# Supplementary material for: Novel sulfonamides unveiled as potent anti-lung cancer agents via tumor pyruvate kinase M2 activation
Source: Royal Society of Chemistry journal article supplement (doi:10.1039/d4md00367e), 2024-01-01
Supplement: d4md00367e1.pdf [file d4md00367e1.pdf]

## ***Supporting Information***

### **Novel Sulfonamides Unveiled as Potent Anti-Lung Cancer Agents via Tumor Pyruvate Kinase M2 Activation**

Rudradip Das<sup>a</sup>, Deep Rohan Chatterjee<sup>a</sup>, Saumya Kapoor<sup>a</sup>, Het Vyas<sup>a</sup> and Amit Shard<sup>a\*</sup>

<sup>a</sup>Department of Medicinal Chemistry, National Institute of Pharmaceutical Education and Research- Ahmedabad (NIPER-A), Opposite Airforce station, Palaj, Gandhinagar, Gujarat – 382355, India.

\*Corresponding author- Email- [amit@niperahm.res.in](mailto:amit@niperahm.res.in) (Orcid id: <https://orcid.org/0000-0003-4109-6275>)

## Contents

|                                                                                                       |     |
|-------------------------------------------------------------------------------------------------------|-----|
| 1. General methods for synthesis.....                                                                 | 2   |
| 2. NMR and HRMS spectral information of the synthesized compounds .....                               | 4   |
| 3. HPLC method and purity chromatogram of synthesized compounds.....                                  | 79  |
| 4. Lactate dehydrogenase-coupled enzyme assay results for compounds (9a-9s and 10a-10s).....          | 95  |
| 5. Cytotoxicity (Alamar blue) assay results for compounds (9a-9s and 10a-10s)- A549 cell line .....   | 96  |
| 6. Cytotoxicity (Alamar blue) assay results for compounds (9a-9s and 10a-10s)- BEAS-2B cell line .... | 96  |
| 7. Cytotoxicity (Alamar blue) assay results for compounds (9a-9s and 10a-10s)- COLO-205 cell line .   | 97  |
| 8. Cytotoxicity (Alamar blue) assay results for compounds (9a-9s and 10a-10s)- MCF-7 cell line .....  | 98  |
| 9. Cytotoxicity (Alamar blue) assay results for compounds (9a-9s and 10a-10s)- CAL-7 cell line .....  | 98  |
| 10. FE-SEM and EDAX data for compound 10q .....                                                       | 99  |
| 11. Molecular dynamic simulation data for 9b-PKM2 interaction .....                                   | 100 |
| 12. Data related to single crystal X-ray diffraction analysis of compound 10q .....                   | 100 |
| 13. Chemical Structures of the synthesized compounds.....                                             | 109 |

## 1. General methods for synthesis

Sulfonyl chloride derivatives, Dimethyl sulfoxide (DMSO), Dimethylformamide (DMF), N,N-Dimethylformamide dimethyl acetal (DMF-DMA), 1-Boc- piperazine, 2-aminopyridine, 2-aminopyrimidine, dimethylformamide (DMF). From Sigma Aldrich, we obtained 1,3-dichloroacetone, and trifluoroacetic acid (TFA). Thermo Fisher Scientific India Pvt. Ltd. supplied the following chemicals: acetonitrile (ACN), dichloromethane (DCM), chloroform (CHCl<sub>3</sub>), ethyl acetate, hexane, ethanol, and methanol. The Corning trans well inserts (6 mm in diameter) and polystyrene polymer (derived from tissue culture polystyrene, or TCPS) were purchased from Sigma Aldrich in India. Using Bruker NMR and internal standard tetramethylsilane (as = 0 ppm), <sup>1</sup>H NMR, <sup>13</sup>C NMR, and <sup>19</sup>F NMR data were collected at 500 MHz, 125 MHz, and 471 MHz respectively. Values for coupling constants (J) are given in Hz. Chemical shift multiplicities were given the following abbreviations: s = singlet, br = broad, d = doublet, t = triplet, q = quartet, and m = multiplet. MestReNova software was used to evaluate the NMR data. Mass spectra were captured using the Agilent 6545, LC/MS using a Q-TOF analyser, in positive mode. Using Agilent 1260 infinity II equipment and an eclipse C18 column (250 4.6 mM, 5 M) eluted at 1 mL/min with 0.1 percent formic acid and acetonitrile, the purity was evaluated. The compounds displayed greater than 95% purity. In the BUCHI M-560 instrument, the melting points of the produced compounds were recorded. A licenced version of Chemdraw was used to create all of the structures.<sup>1,2</sup>

Initially, 3.0 equivalence of DMF-DMA was applied to 2-aminopyri(mi)dine **1a-b** in the presence of methanol at 80 °C for 4 hours. The consumption of all of the 2-aminopyri(mi)dine **1a-b** was used to determine when the reaction had finished by thin layer chromatography (TLC).<sup>1</sup> Without additional purification, the reaction mixture was concentrated under vacuum pressure and used to furnish the Schiff base **2a-b**. The finished product was exposed to 1,3-dichloroacetone **3** for four hours at 70°C in the presence of the aprotic solvent acetonitrile. The imidazopyri(mi)dine substituted chloroacetophenone adduct **4a-b** was purified by column chromatography and used as a starting material for further reactions after the reaction was finished. Next, three steps were taken to complete the synthesis. A round-bottomed flask was first filled with a mixture of

substituted sulfonyl chlorides **6** (1 equiv) and Boc-protected piperazine **5** (1.05 equiv) in 4 mL of dichloromethane. Next, triethylamine (1.2 equiv) was added while the mixture was continuously stirred at room temperature for two hours. TLC kept track of the reaction's development (Hexane: Ethyl acetate in the ratio of 70:30). The reaction mixture was first extracted with ethyl acetate after which it was washed with water, dried over anhydrous sodium sulphate, filtered, and the solvent was then evaporated using a rotary evaporator. The crude product **7** then went through the deprotection process. Trifluoroacetic acid (TFA) and DCM (3:7) were used to dissolve the dry intermediate, which was then agitated at room temperature for two hours. DCM and TFA were evaporated on the rotary evaporator after the deprotection was confirmed by TLC (Hexane: Ethyl acetate in the ratio of 50:50). Following that, DMSO was added to the deprotected intermediate **8** and it was dissolved. Then, the previously synthesised imidazopyri(mi)dine substituted chloroacetophenone adduct **4a-b** (1 equiv.) and activated  $K_2CO_3$  (1.2 equiv.) were added, and the mixture was agitated at 80 °C for two hours. The reaction mixture was poured over crushed ice after it had finished, as determined by TLC (in 100 percent ethyl acetate), and then extracted using a DCM-water solvent system. In order to obtain the product as a yellowish-white solid, the extracted organic layer was passed over anhydrous sodium sulphate and purified by column chromatography (with mobile phase hexane: ethyl acetate in the ratio of 30:70). The  $^1H$ ,  $^{13}C$ ,  $^{19}F$  NMR spectra, and HRMS readings were used to comprehensively characterise each product **9a-s** and **10a-s**.

1. Rasapalli, S., Kumbam, V., Dhawane, A. N., Golen, J. A., Lovely, C. J., & Rheingold, A. L. (2013). Total syntheses of oroidin, hymenidin and clathrocin. *Organic & Biomolecular Chemistry*, 11(25), 4133-4137.
2. Vasu, K. K., Digwal, C. S., Pandya, A. N., Pandya, D. H., Sharma, J. A., Patel, S., & Agarwal, M. (2017). Imidazo [1, 2-a] pyridines linked with thiazoles/thiophene motif through keto spacer as potential cytotoxic agents and NF- $\kappa$ B inhibitors. *Bioorganic & Medicinal Chemistry Letters*, 27(24), 5463-5466.

## 2. NMR and HRMS spectral information of the synthesized compounds

### NMR and HRMS spectra

1: 1- (imidazo[1,2-a]pyrimidin-3-yl)-2-(4-(phenylsulfonyl)piperazin-1-yl)ethan-1-one (**9b**) (<sup>1</sup>H NMR, <sup>13</sup>C NMR & HRMS Spectra)

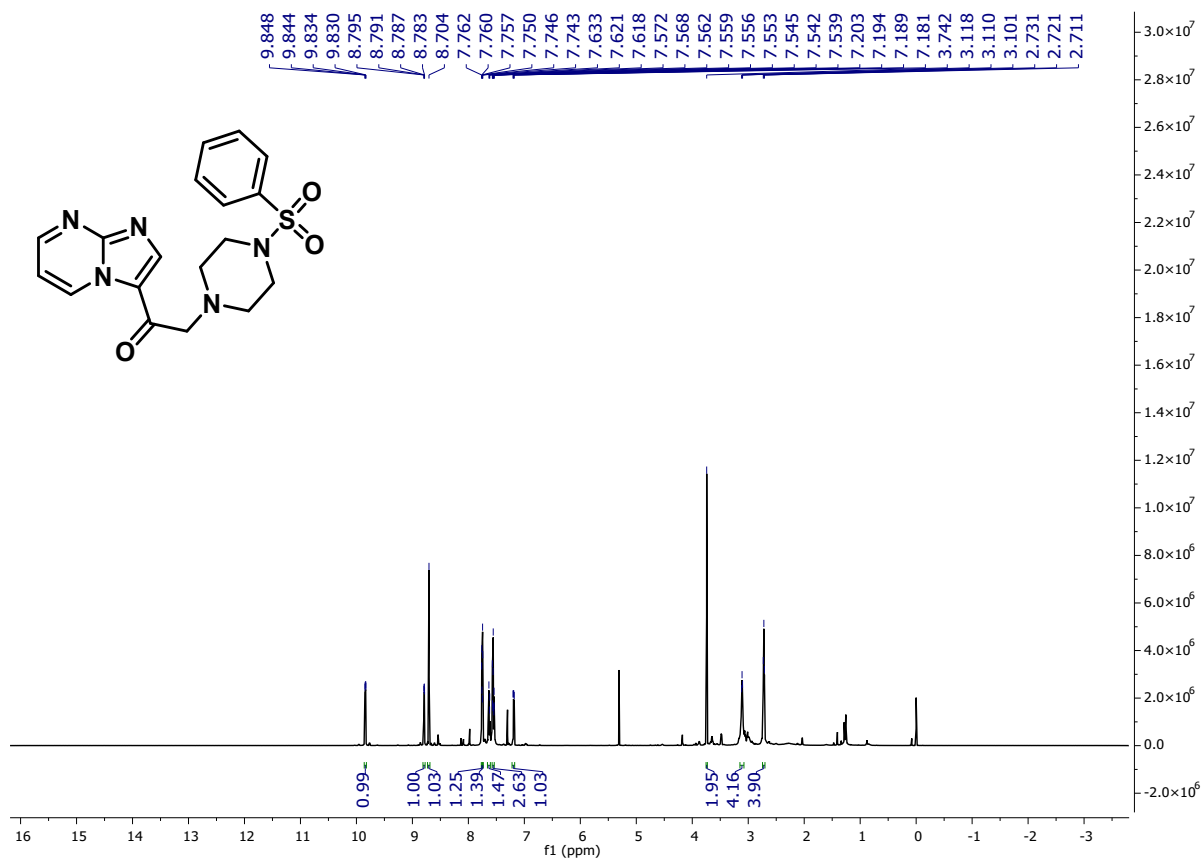

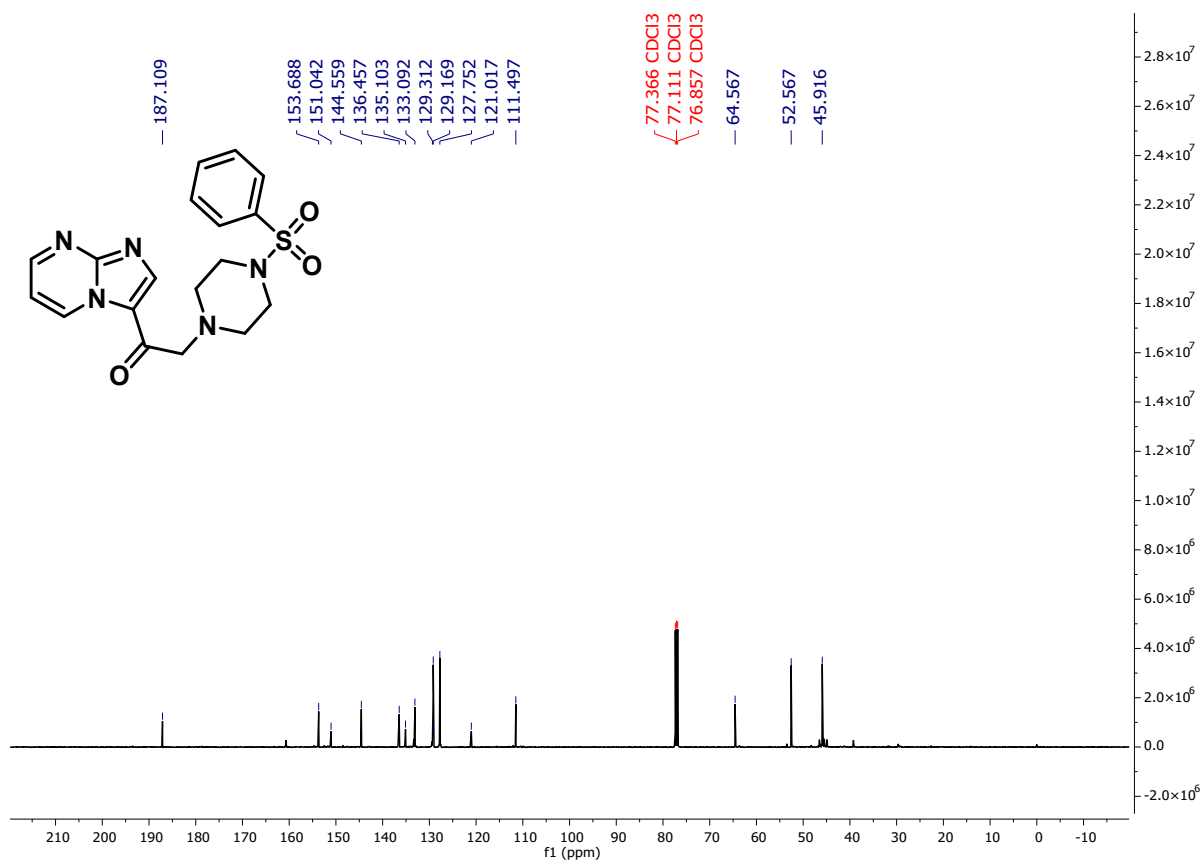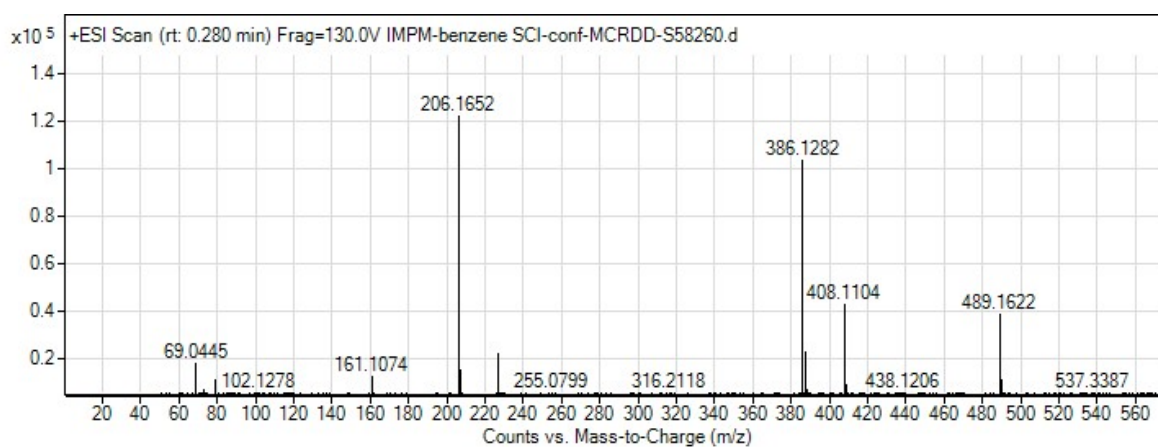

**FIGURE S1: 1- (imidazo[1,2-a]pyrimidin-3-yl)-2-(4-(phenylsulfonyl)piperazin-1-yl)ethan-1-one (9b) (<sup>1</sup>H NMR, <sup>13</sup>C NMR & HRMS Spectra).**

2: 1-(imidazo[1,2-a]pyrimidin-3-yl)-2-(4-(thiophen-2-ylsulfonyl)piperazin-1-yl)ethan-1-one (**9c**) (<sup>1</sup>H NMR, <sup>13</sup>C NMR & HRMS Spectra)

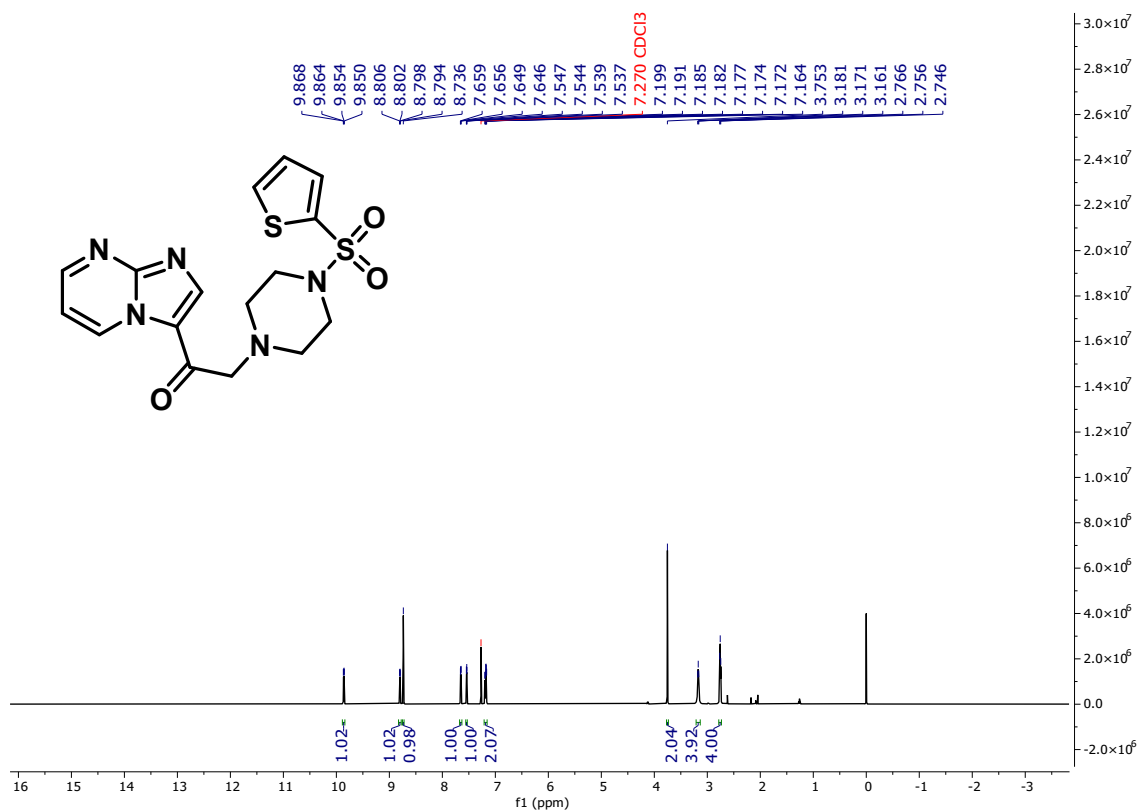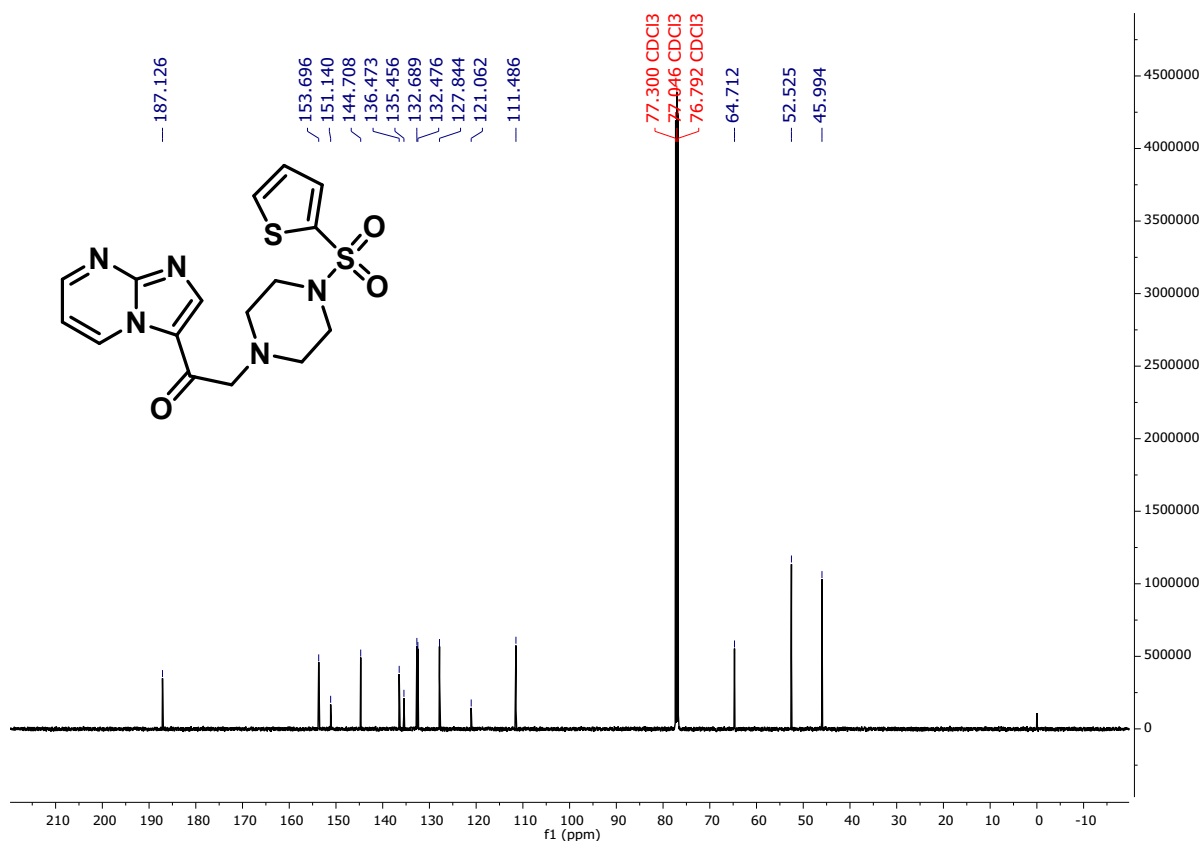

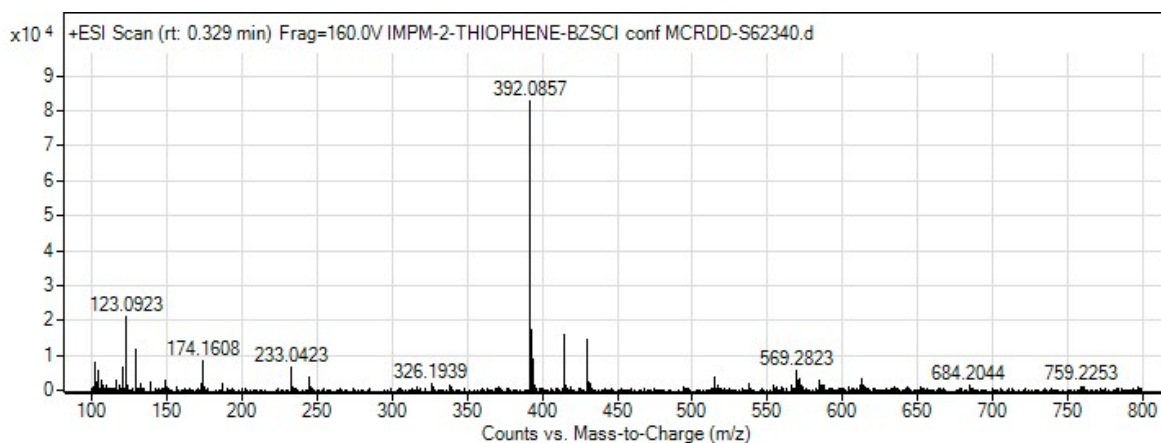

**FIGURE S2: 1-(imidazo[1,2-a]pyrimidin-3-yl)-2-(4-(thiophen-2-ylsulfonyl)piperazin-1-yl)ethan-1-one (9c) (<sup>1</sup>H NMR, <sup>13</sup>C NMR & HRMS Spectra).**

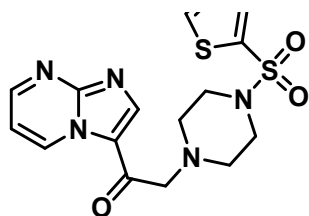



**3: 1-(imidazo[1,2-a]pyrimidin-3-yl)-2-(4-((4-(trifluoromethyl)phenyl)sulfonyl)piperazin-1-yl)ethan-1-one (9d) (<sup>1</sup>H NMR, <sup>13</sup>C NMR, <sup>19</sup>F NMR & HRMS Spectra)**

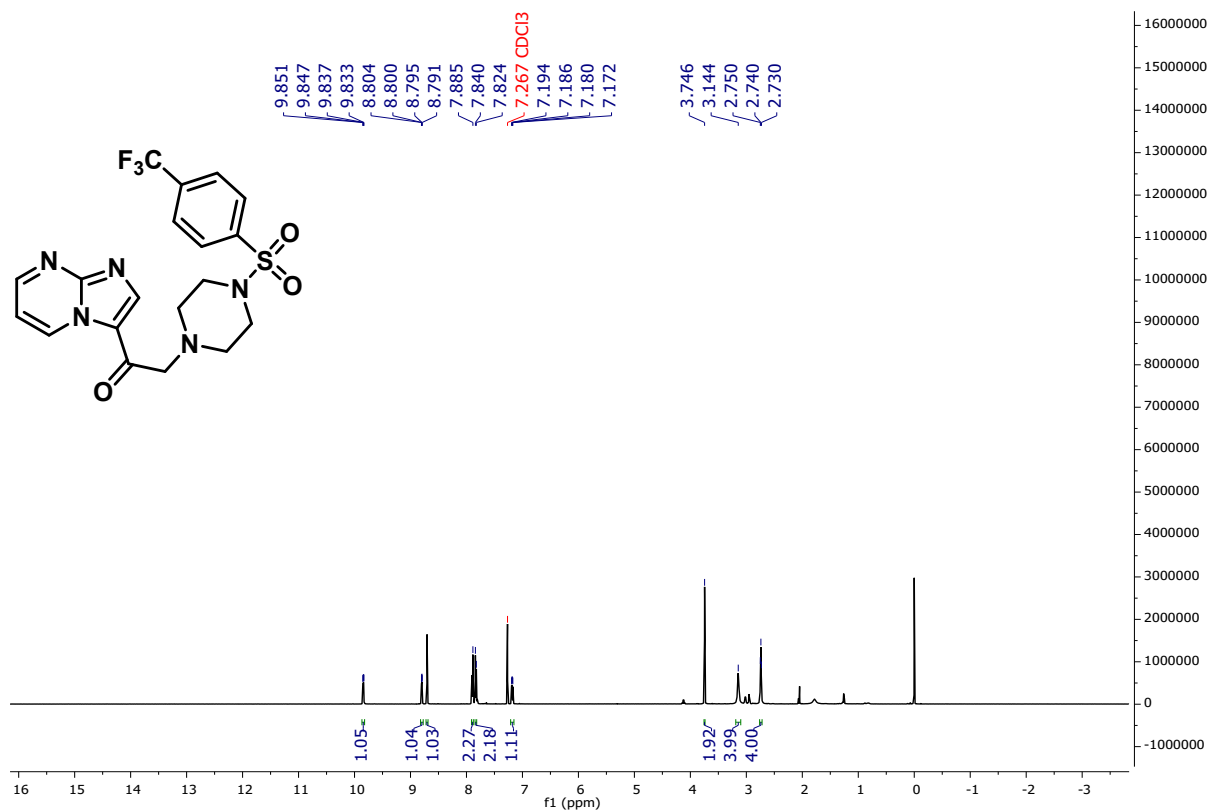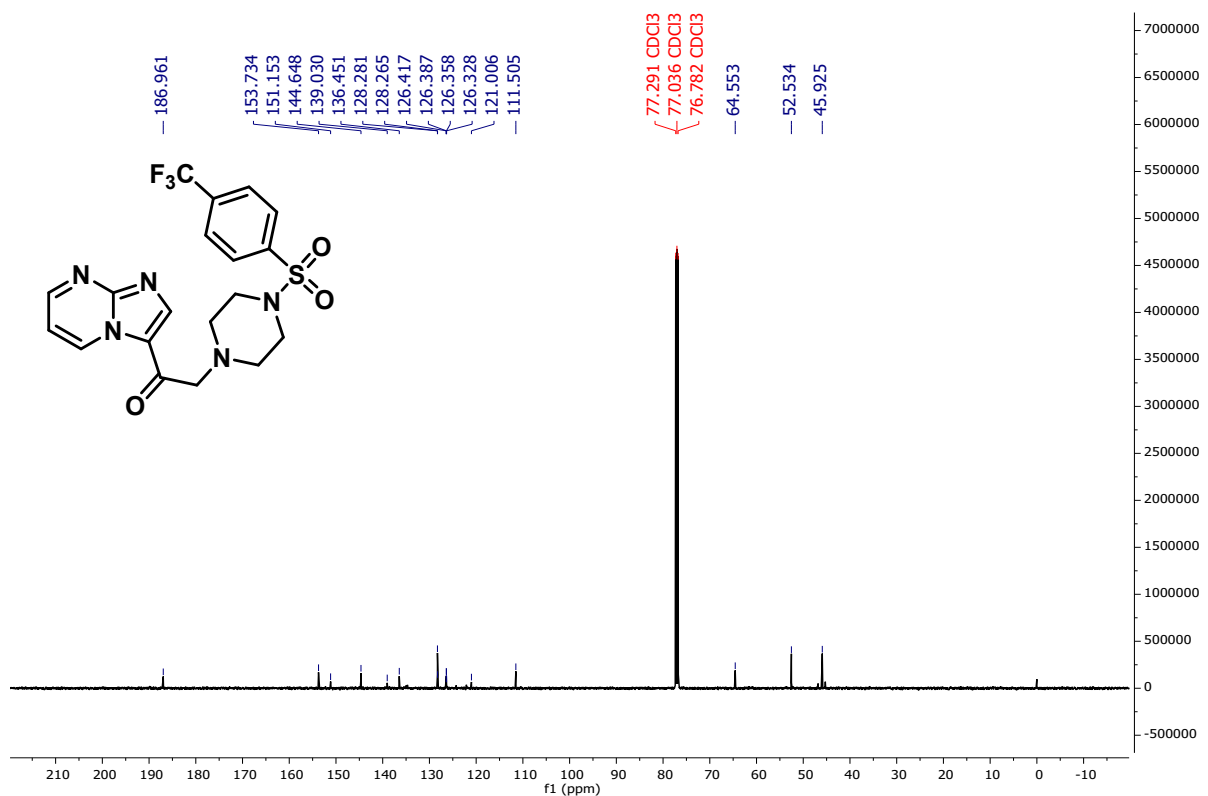

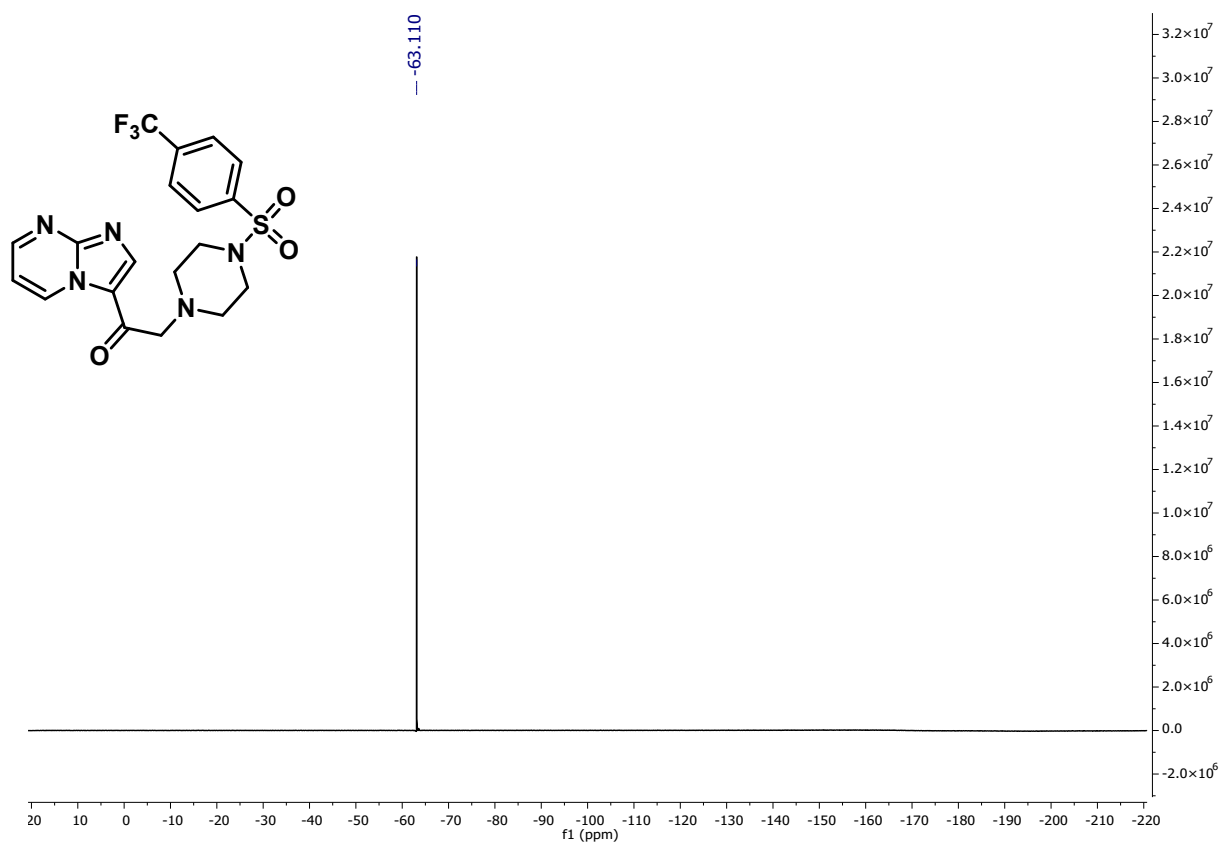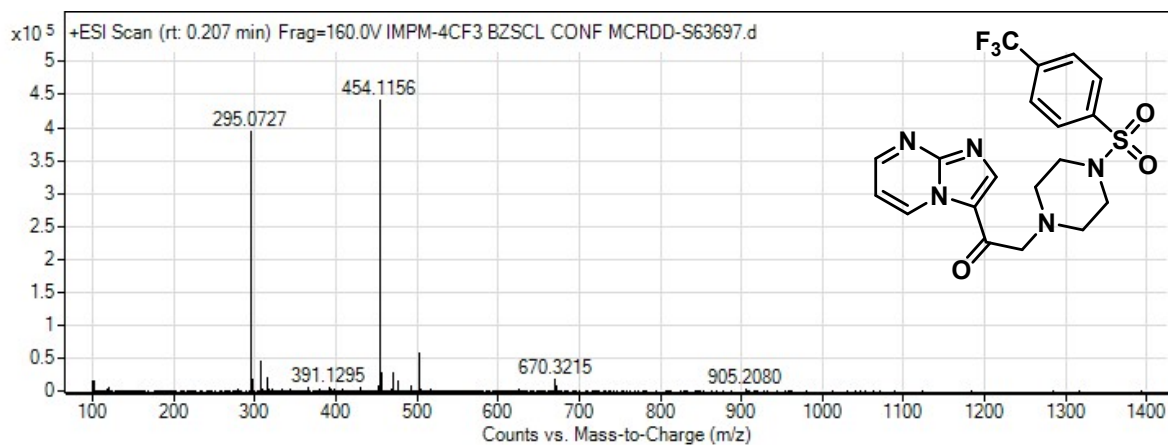

**FIGURE S3: 1-(imidazo[1,2-a]pyrimidin-3-yl)-2-(4-((4-(trifluoromethyl)phenyl)sulfonyl)piperazin-1-yl)ethan-1-one (9d) ( $^1\text{H}$  NMR,  $^{13}\text{C}$  NMR,  $^{19}\text{F}$  NMR & HRMS Spectra).**

4: 2-(4-((5-bromo-2-methoxyphenyl)sulfonyl)piperazin-1-yl)-1-(imidazo[1,2-a]pyrimidin-3-yl)ethan-1-one (9j) (<sup>1</sup>H NMR, <sup>13</sup>C NMR & HRMS Spectra)

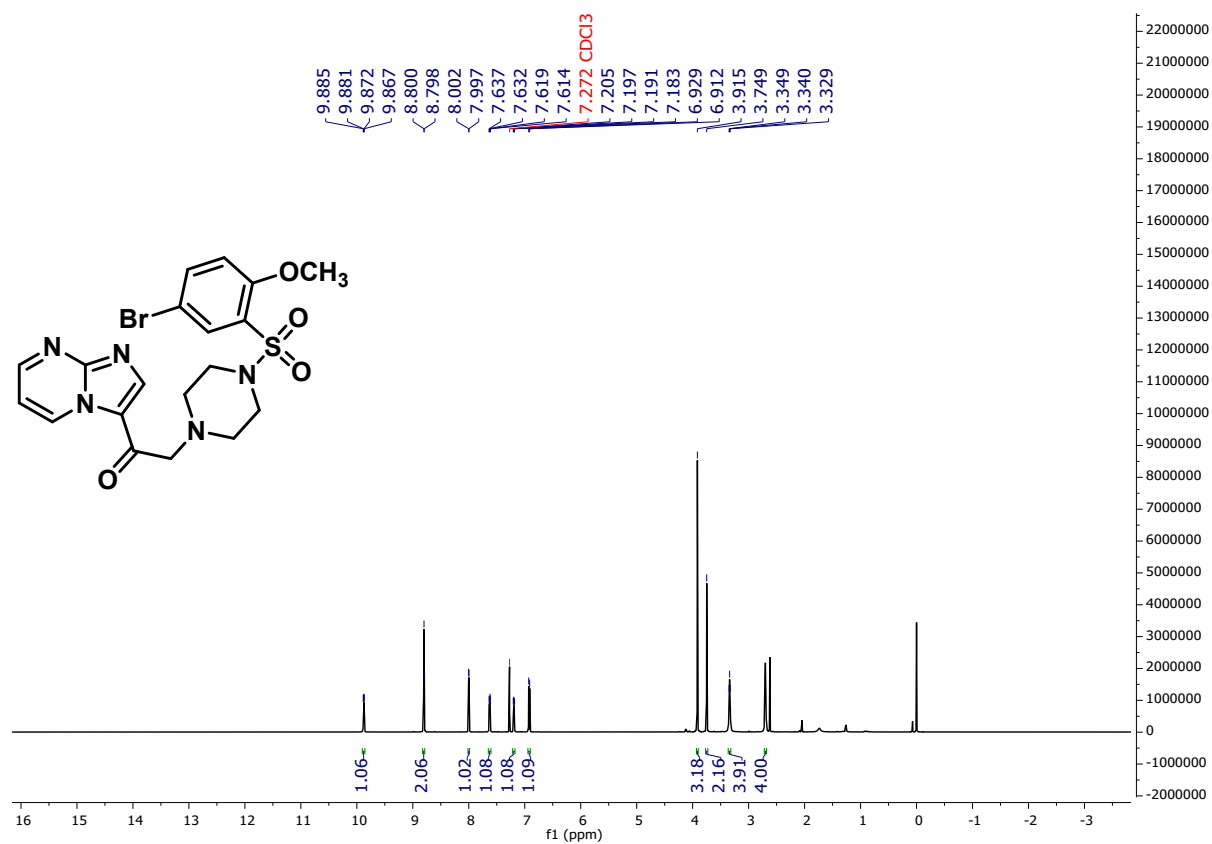

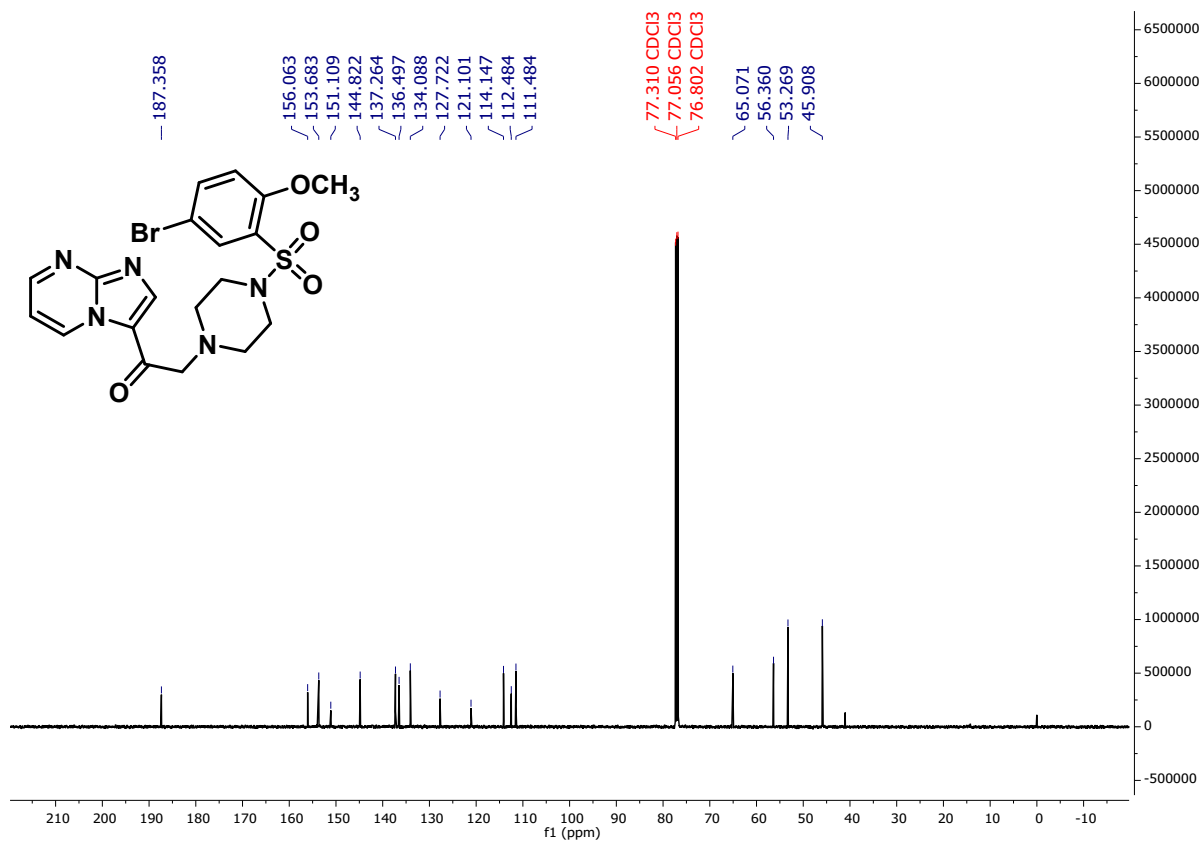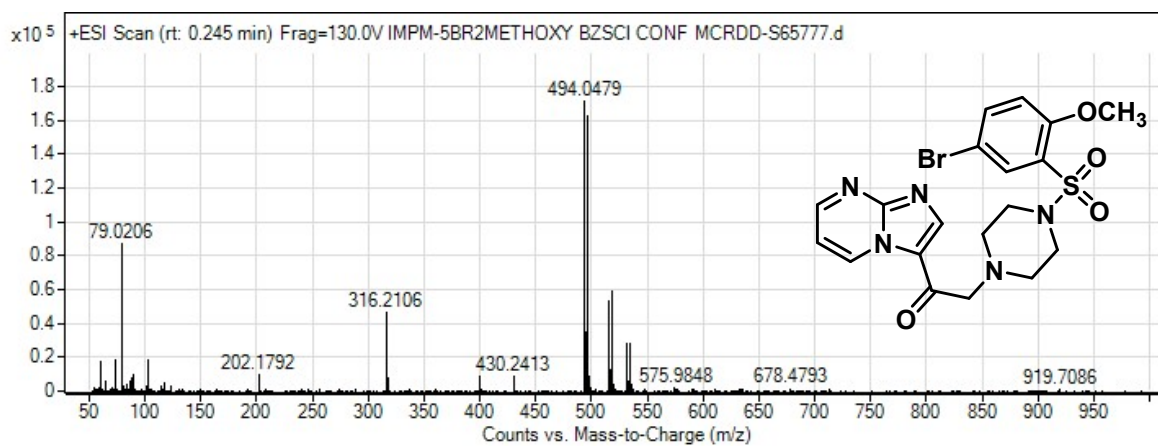

**FIGURE S4: 2-(4-(5-bromo-2-methoxyphenyl)sulfonyl)piperazin-1-yl)-1-(imidazo[1,2-a]pyrimidin-3-yl)ethan-1-one (9j) (<sup>1</sup>H NMR, <sup>13</sup>C NMR & HRMS Spectra).**

5: 1-(imidazo[1,2-a]pyrimidin-3-yl)-2-(4-tosylpiperazin-1-yl)ethan-1-one (9a) (<sup>1</sup>H NMR, <sup>13</sup>C NMR & HRMS Spectra)

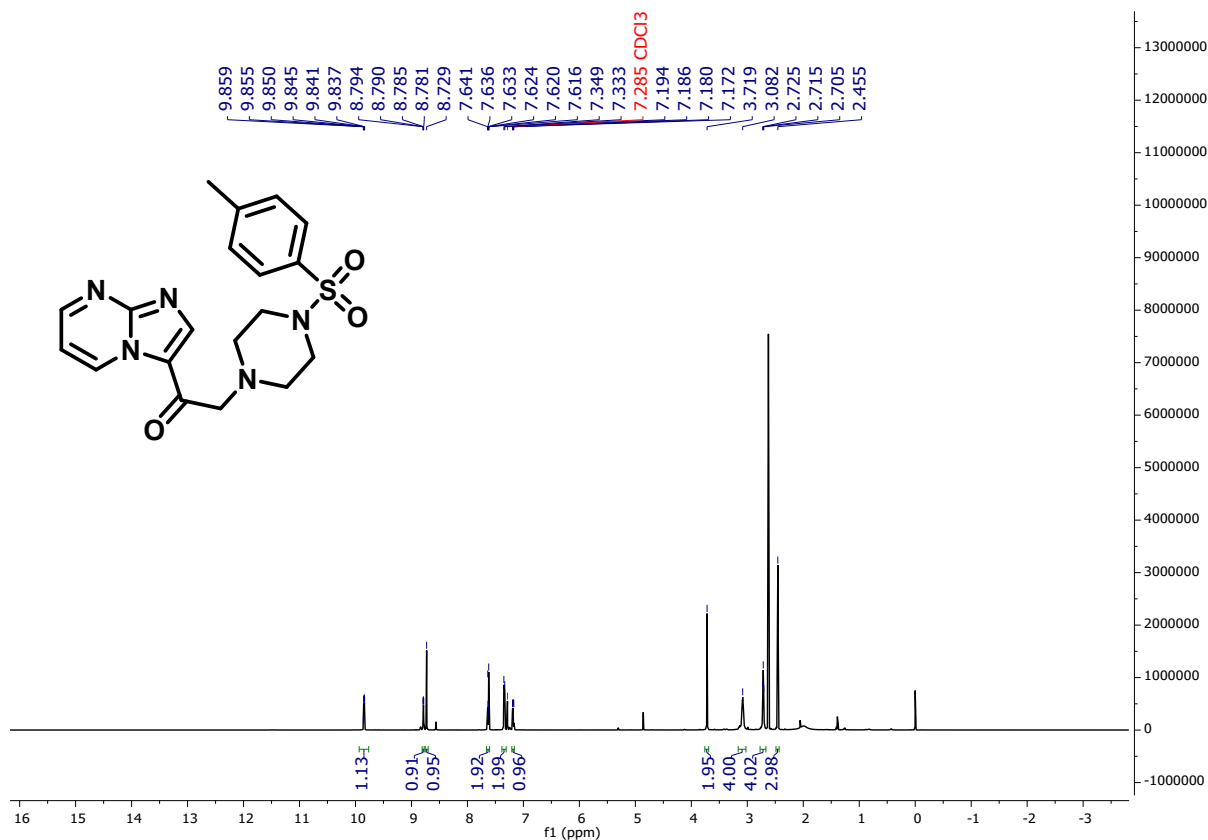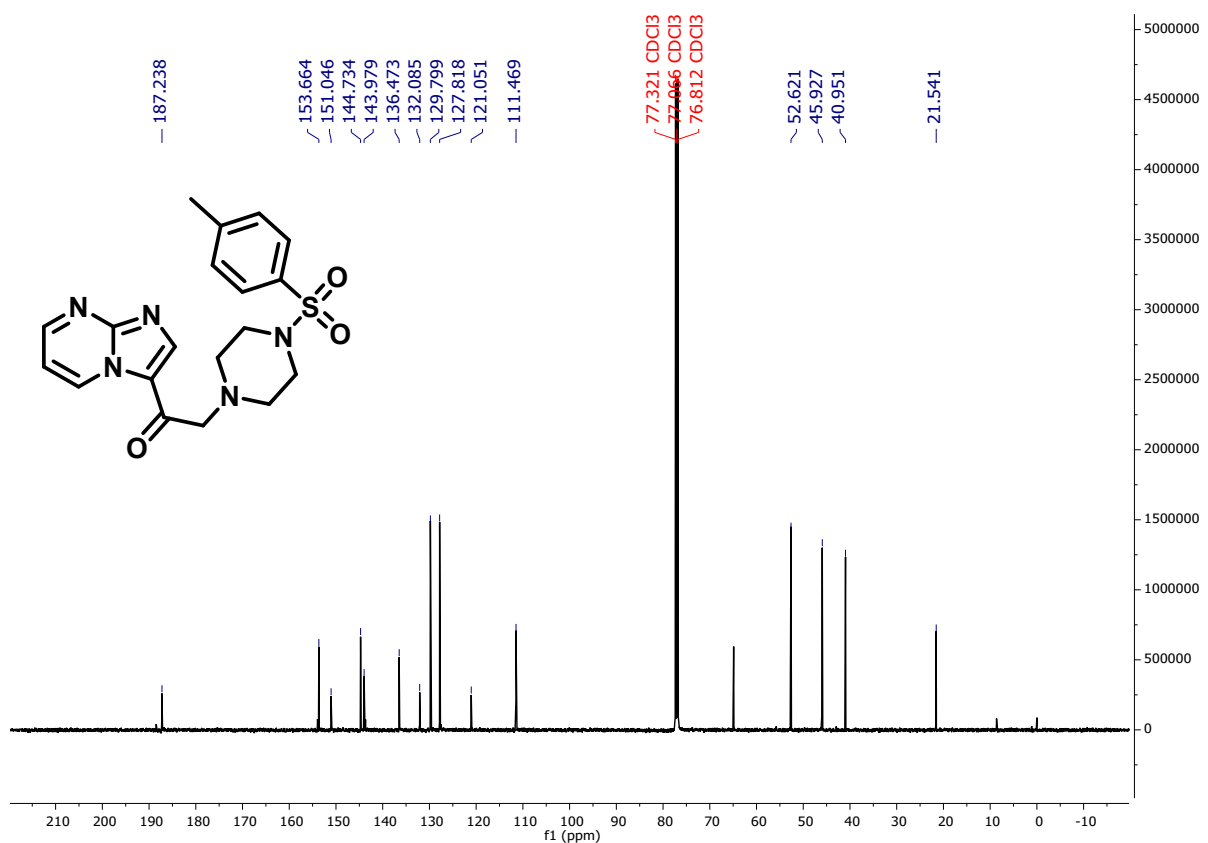

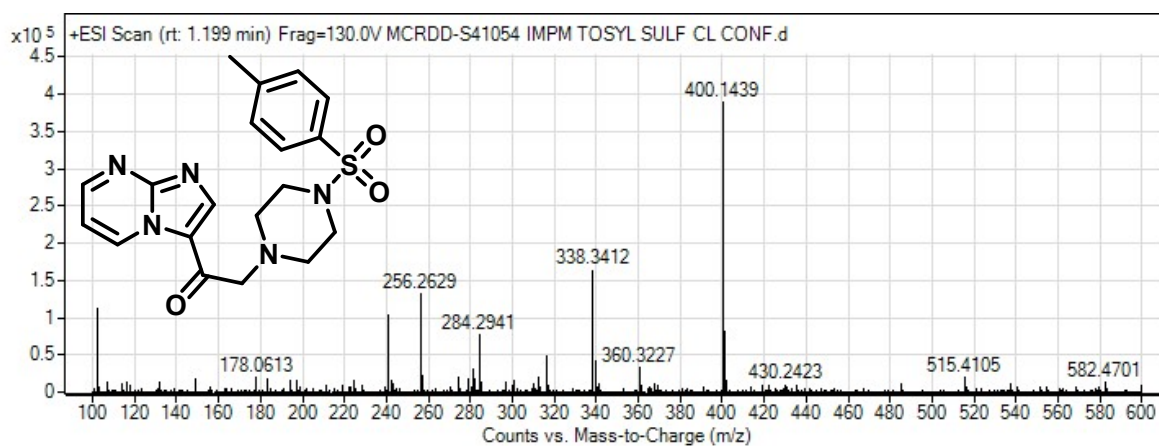

**FIGURE S5: 1-(imidazo[1,2-a]pyrimidin-3-yl)-2-(4-tosylpiperazin-1-yl)ethan-1-one (9a) (<sup>1</sup>H NMR, <sup>13</sup>C NMR & HRMS Spectra).**

6: 2-(4-(4-bromophenyl)sulfonyl)piperazin-1-yl)-1-(imidazo[1,2-a]pyrimidin-3-yl)ethan-1-one (9e)  
 (<sup>1</sup>H NMR, <sup>13</sup>C NMR & HRMS Spectra)

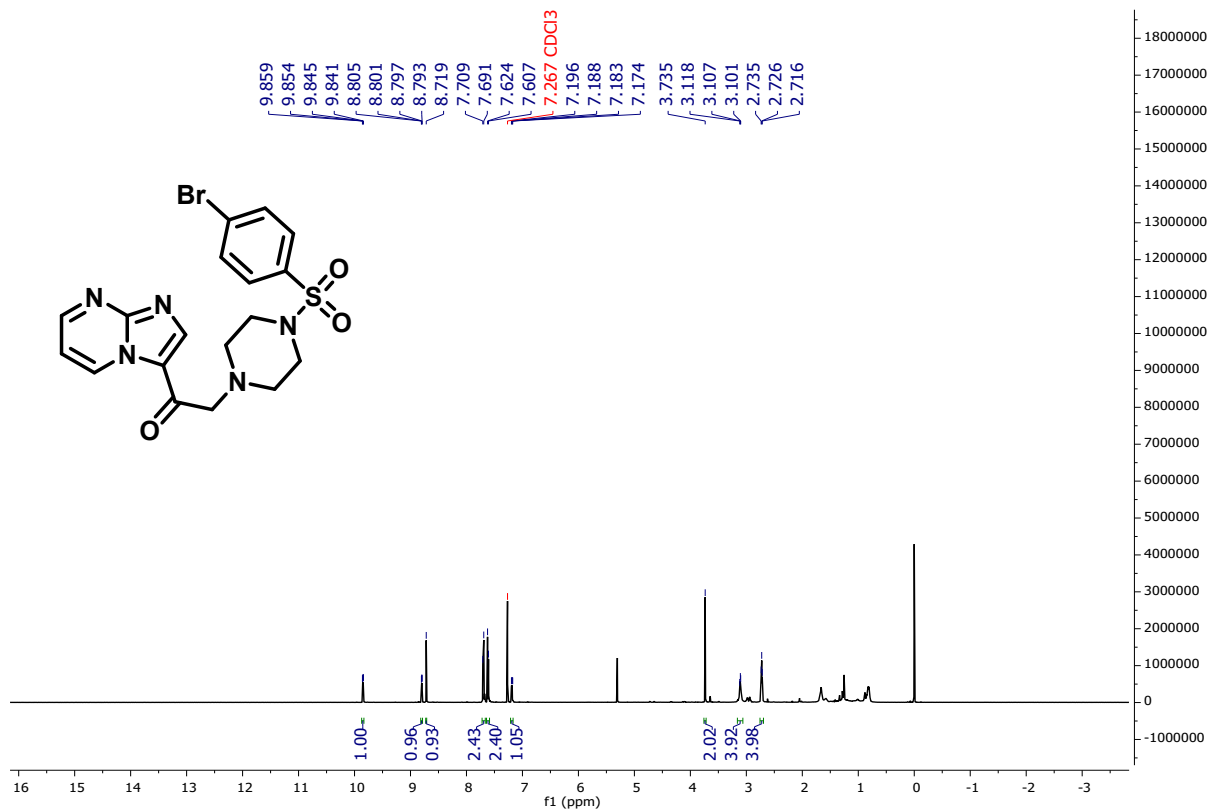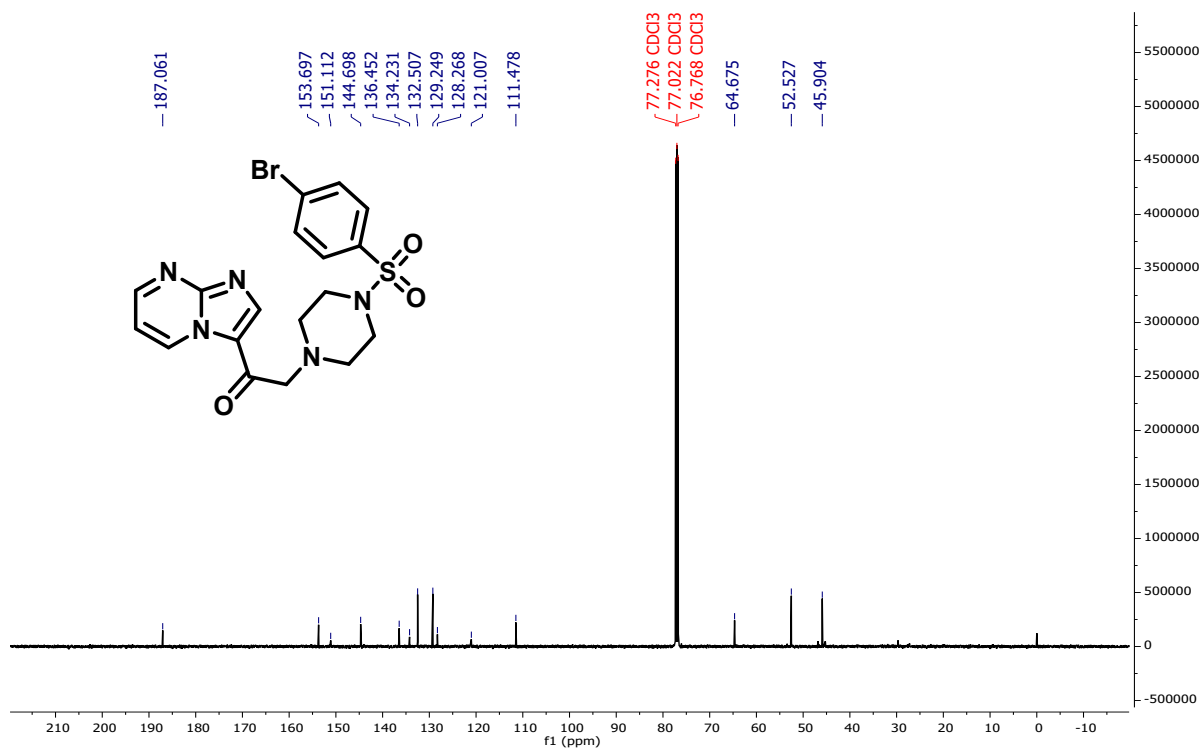

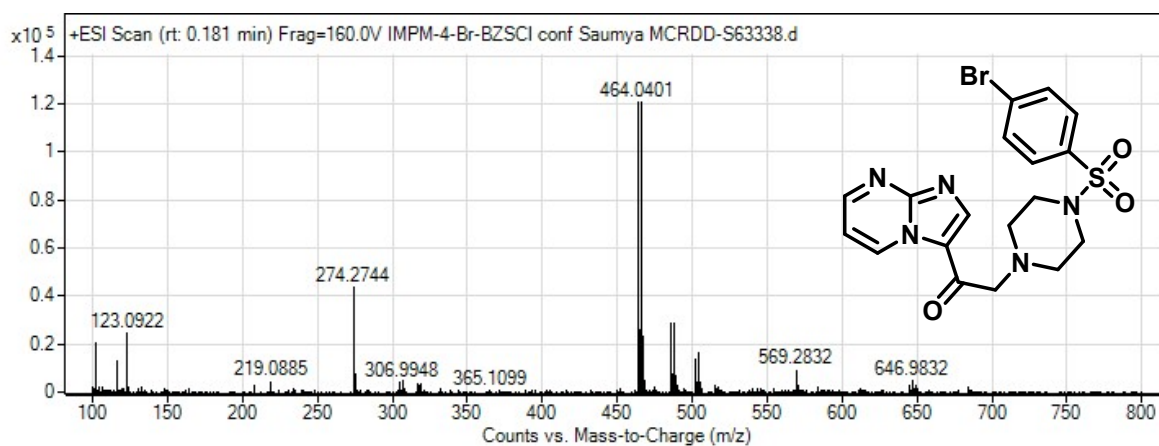

**FIGURE S6:** 2-(4-((4-bromophenyl)sulfonyl)piperazin-1-yl)-1-(imidazo[1,2-a]pyrimidin-3-yl)ethan-1-one (9e) ( $^1\text{H}$  NMR,  $^{13}\text{C}$  NMR & HRMS Spectra).



**7: 2-(4-((4-fluorophenyl)sulfonyl)piperazin-1-yl)-1-(imidazo[1,2-a]pyrimidin-3-yl)ethan-1-one (9f)**  
 (<sup>1</sup>H NMR, <sup>13</sup>C NMR, <sup>19</sup>F NMR & HRMS Spectra)

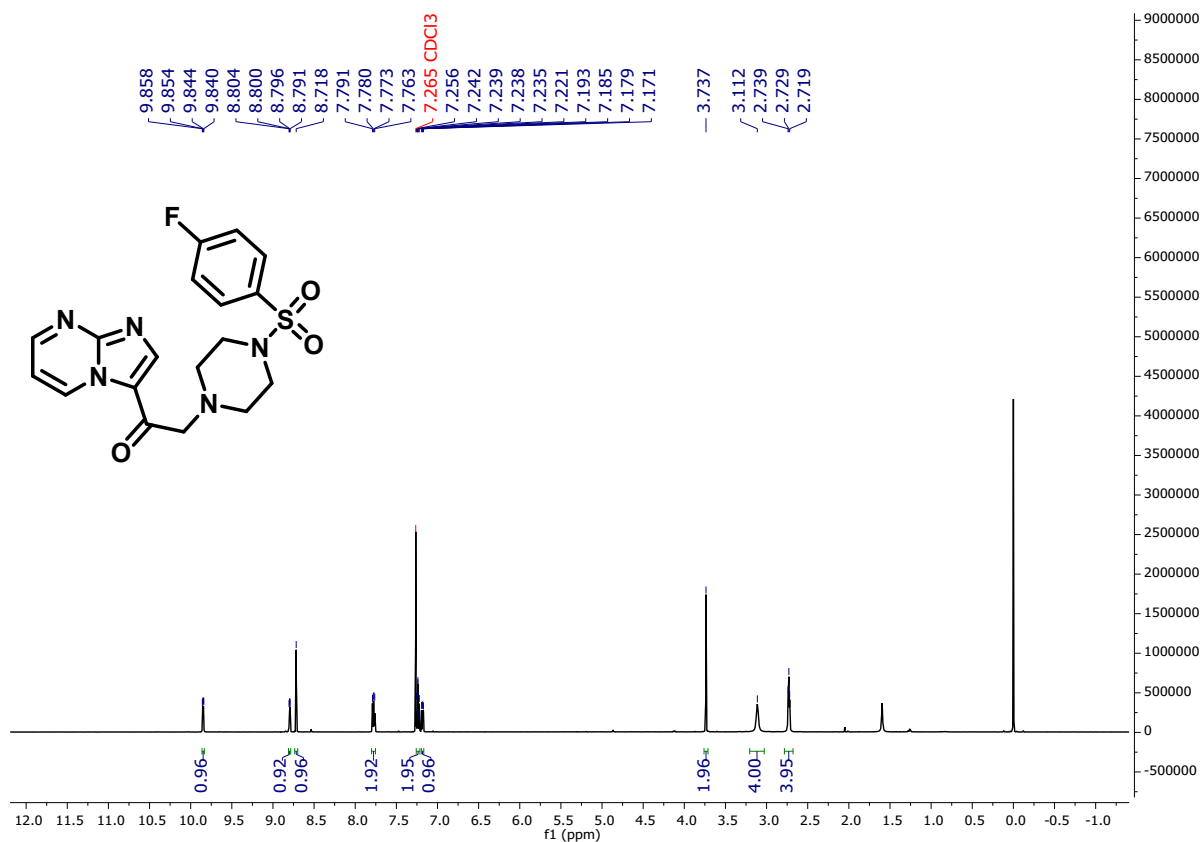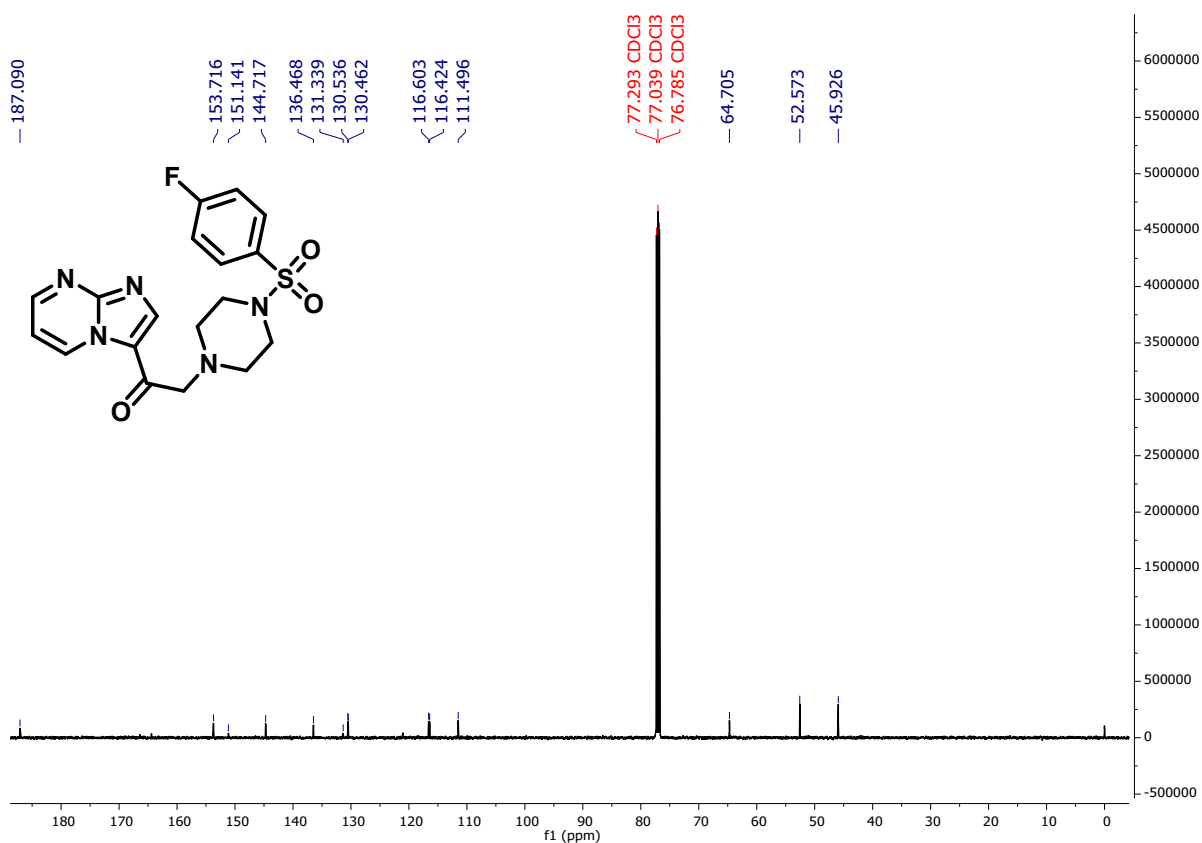

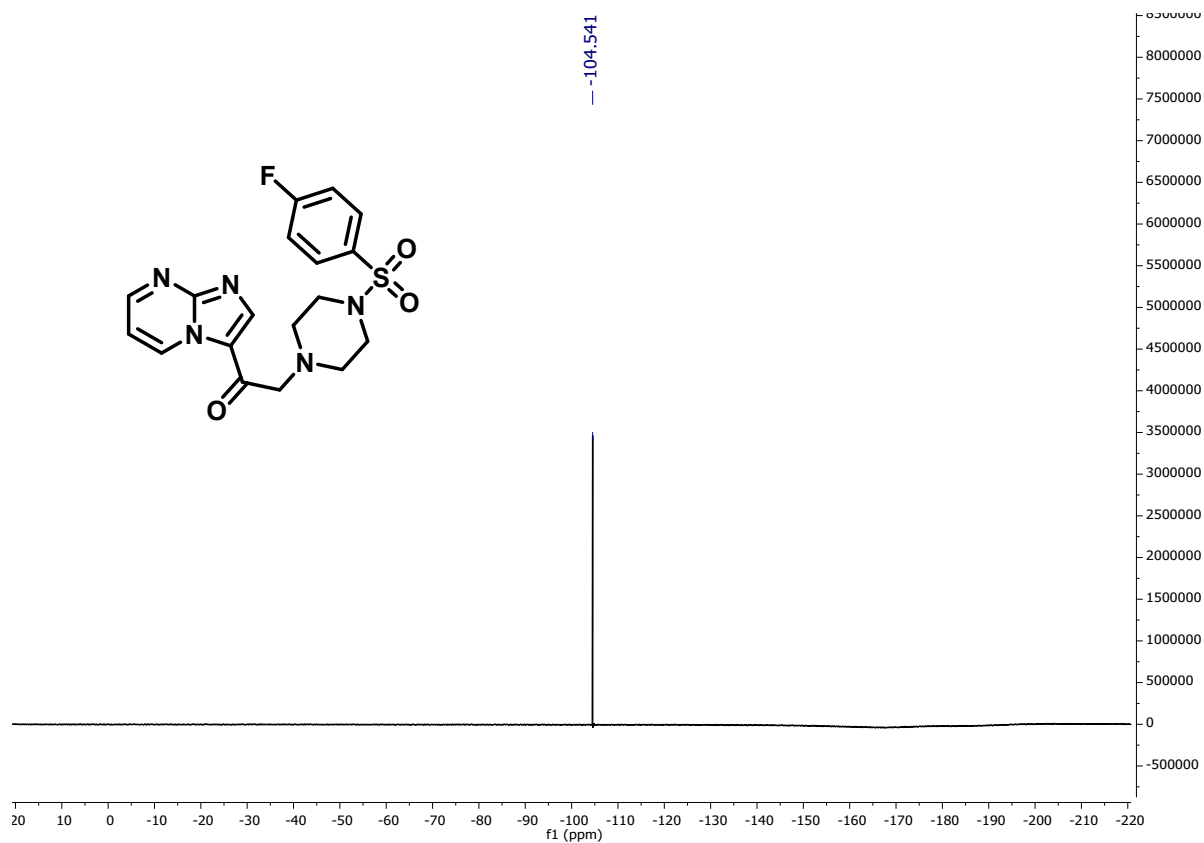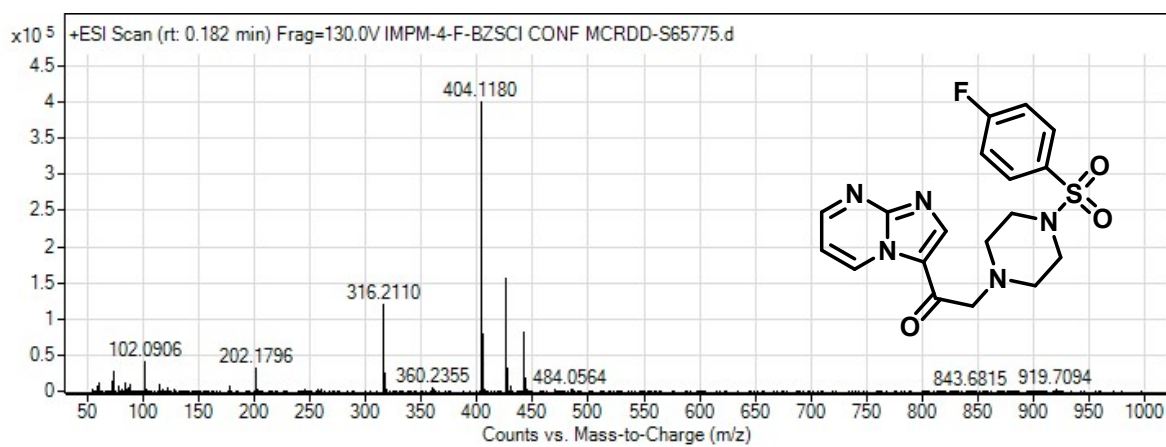

**FIGURE S7: 2-(4-((4-fluorophenyl)sulfonyl)piperazin-1-yl)-1-(imidazo[1,2-a]pyrimidin-3-yl)ethan-1-one (9f) ( $^1\text{H}$  NMR,  $^{13}\text{C}$  NMR,  $^{19}\text{F}$  NMR & HRMS Spectra).**

8: 1-(imidazo[1,2-a]pyrimidin-3-yl)-2-(4-((4-methoxyphenyl)sulfonyl)piperazin-1-yl)ethan-1-one  
 (9g) (<sup>1</sup>H NMR, <sup>13</sup>C NMR & HRMS Spectra)

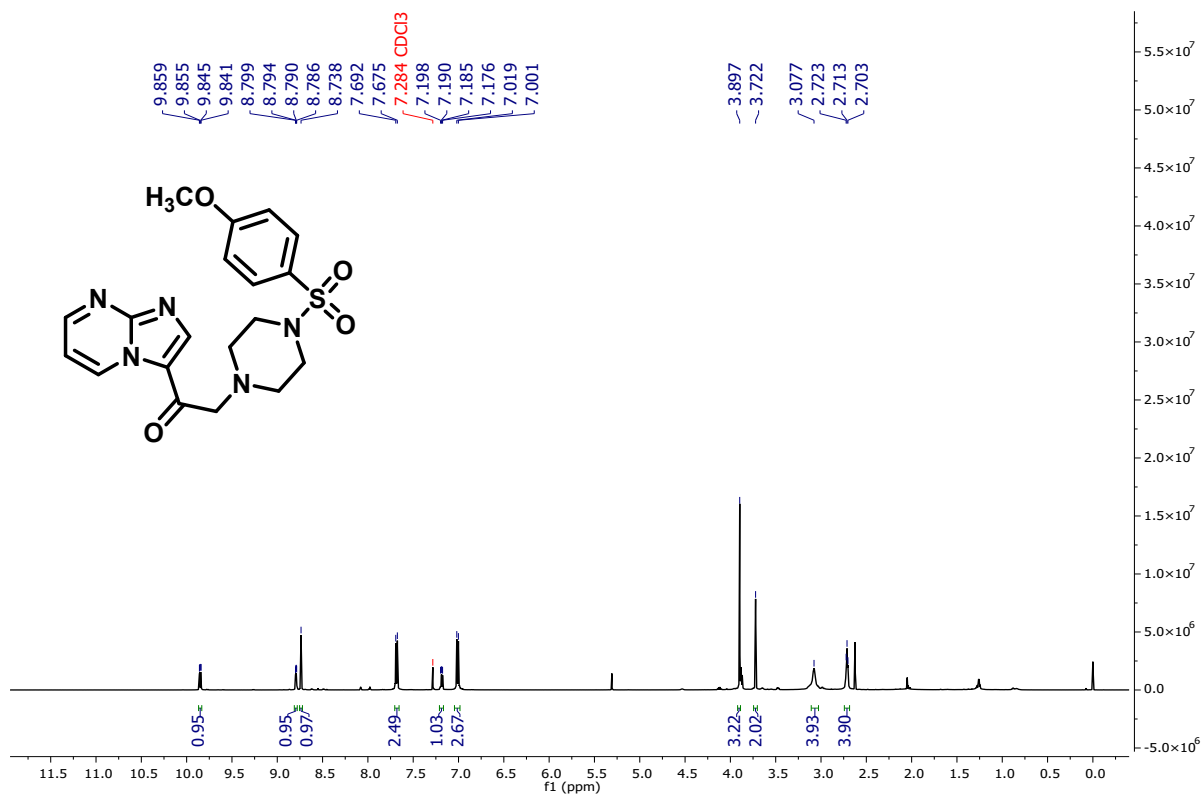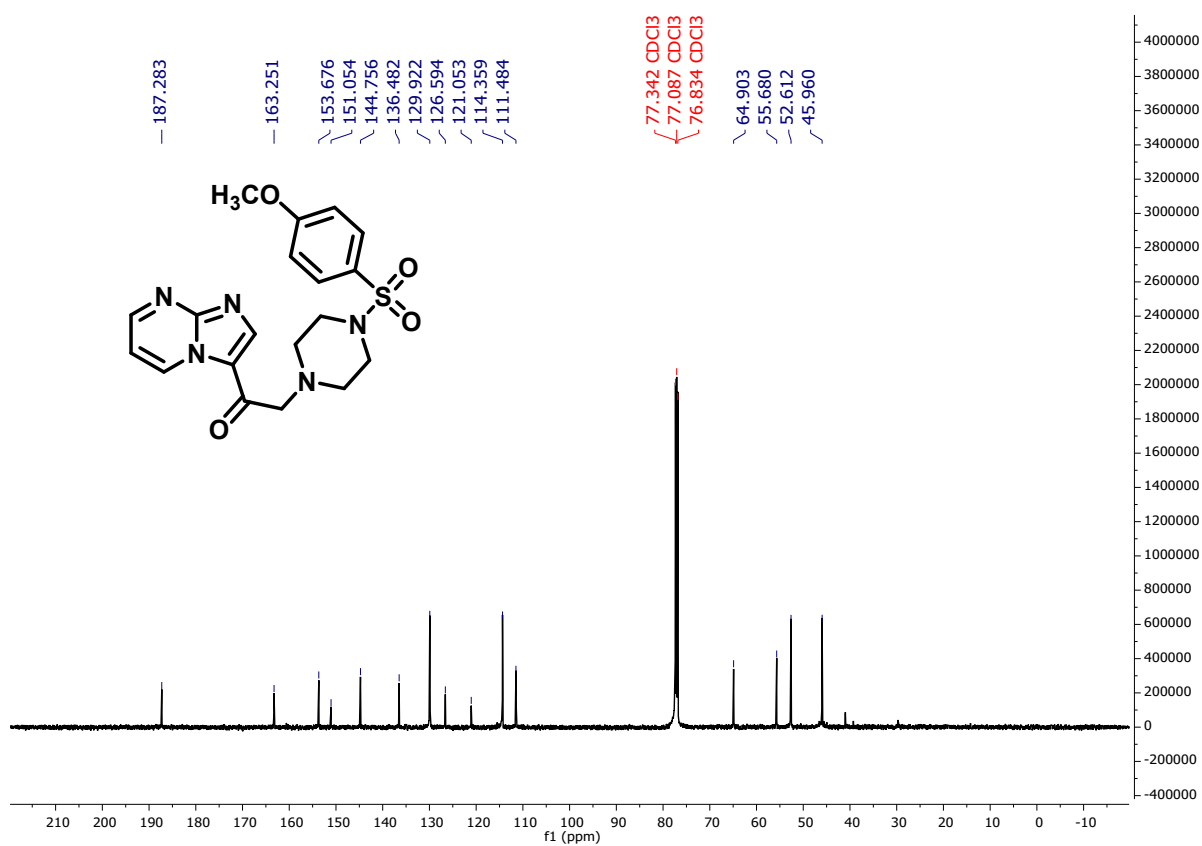

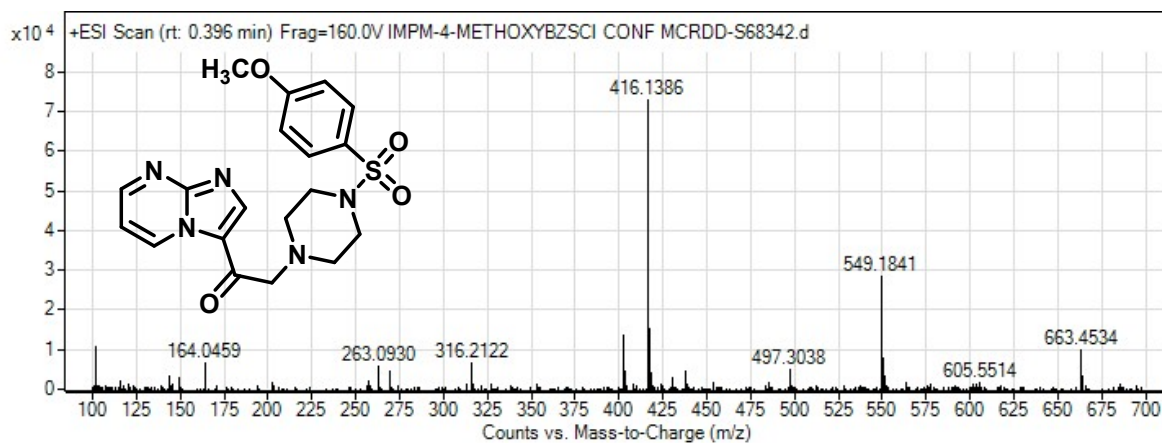

**FIGURE S8:** 1-(imidazo[1,2-a]pyrimidin-3-yl)-2-(4-((4-methoxyphenyl)sulfonyl)piperazin-1-yl)ethan-1-one (9g) (<sup>1</sup>H NMR, <sup>13</sup>C NMR & HRMS Spectra).

9: 2-(4-((2,5-dichlorophenyl)sulfonyl)piperazin-1-yl)-1-(imidazo[1,2-a]pyrimidin-3-yl)ethan-1-one  
 (9h) (<sup>1</sup>H NMR, <sup>13</sup>C NMR & HRMS Spectra)

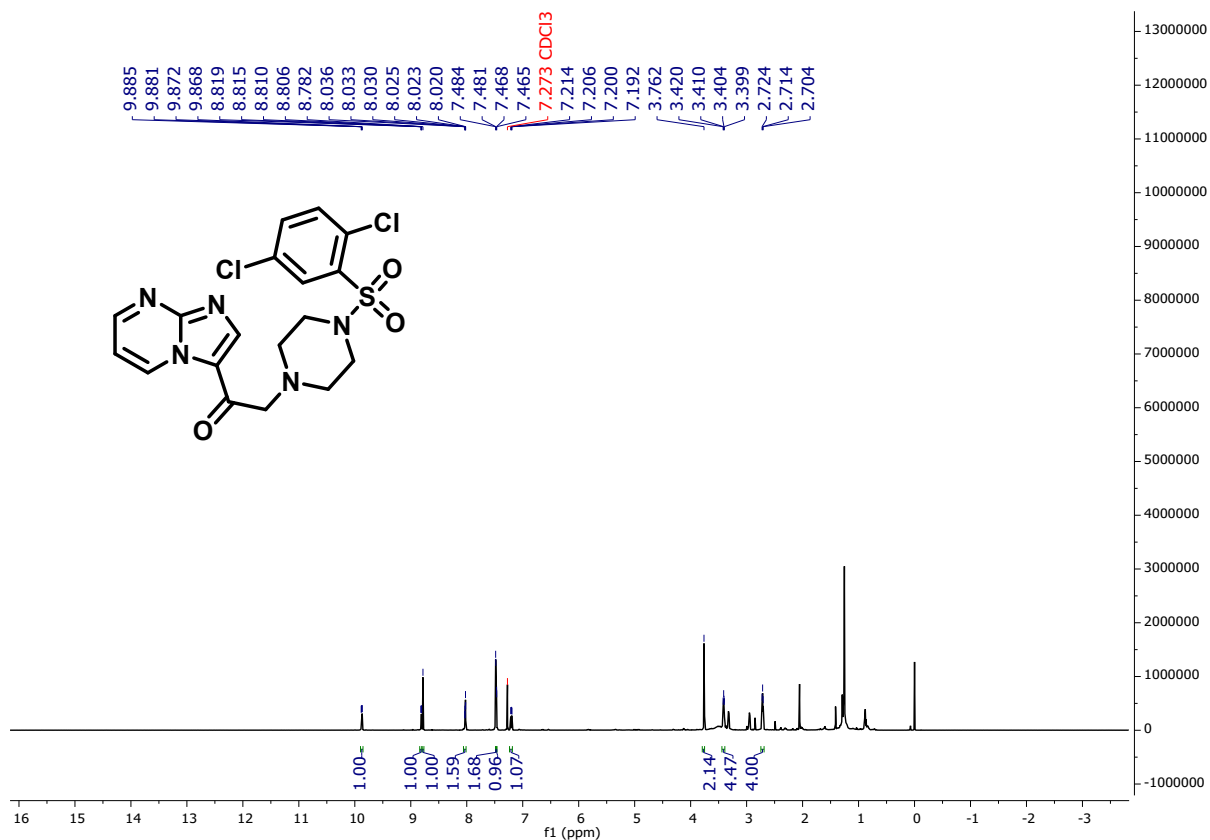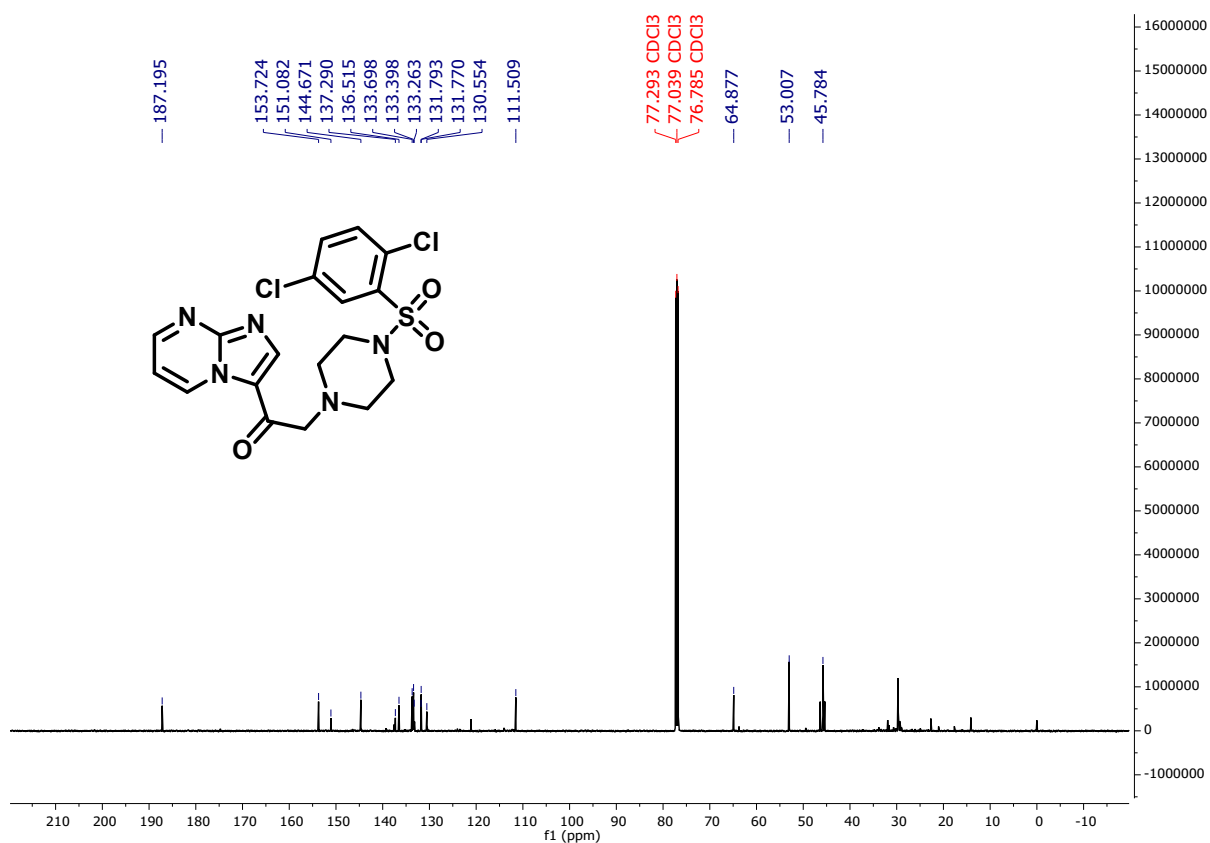

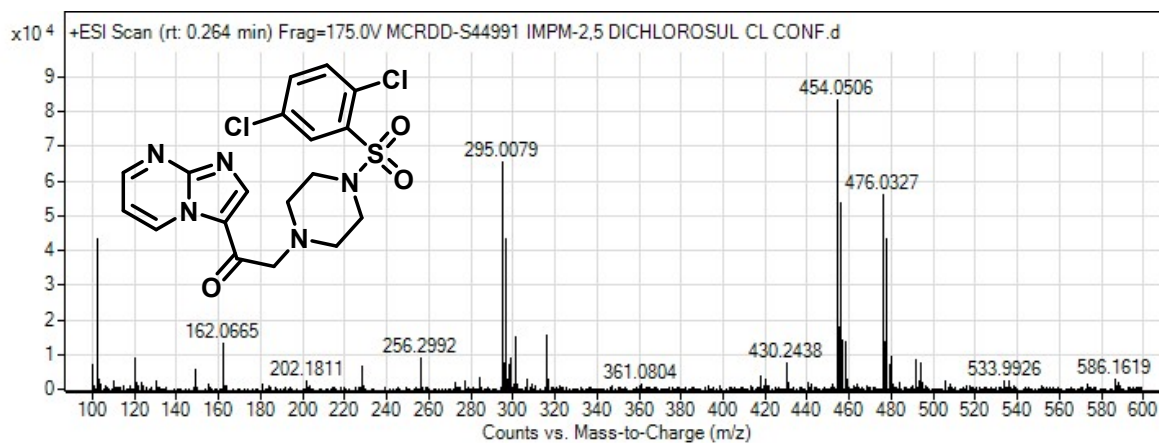

**FIGURE S9:** 2-(4-((2,5-dichlorophenyl)sulfonyl)piperazin-1-yl)-1-(imidazo[1,2-a]pyrimidin-3-yl)ethan-1-one (9h) (<sup>1</sup>H NMR, <sup>13</sup>C NMR & HRMS Spectra).

**10: 1-(imidazo[1,2-a]pyrimidin-3-yl)-2-(4-(mesitylsulfonyl)piperazin-1-yl)ethan-1-one (**9i**) (<sup>1</sup>H NMR, <sup>13</sup>C NMR & HRMS Spectra)**

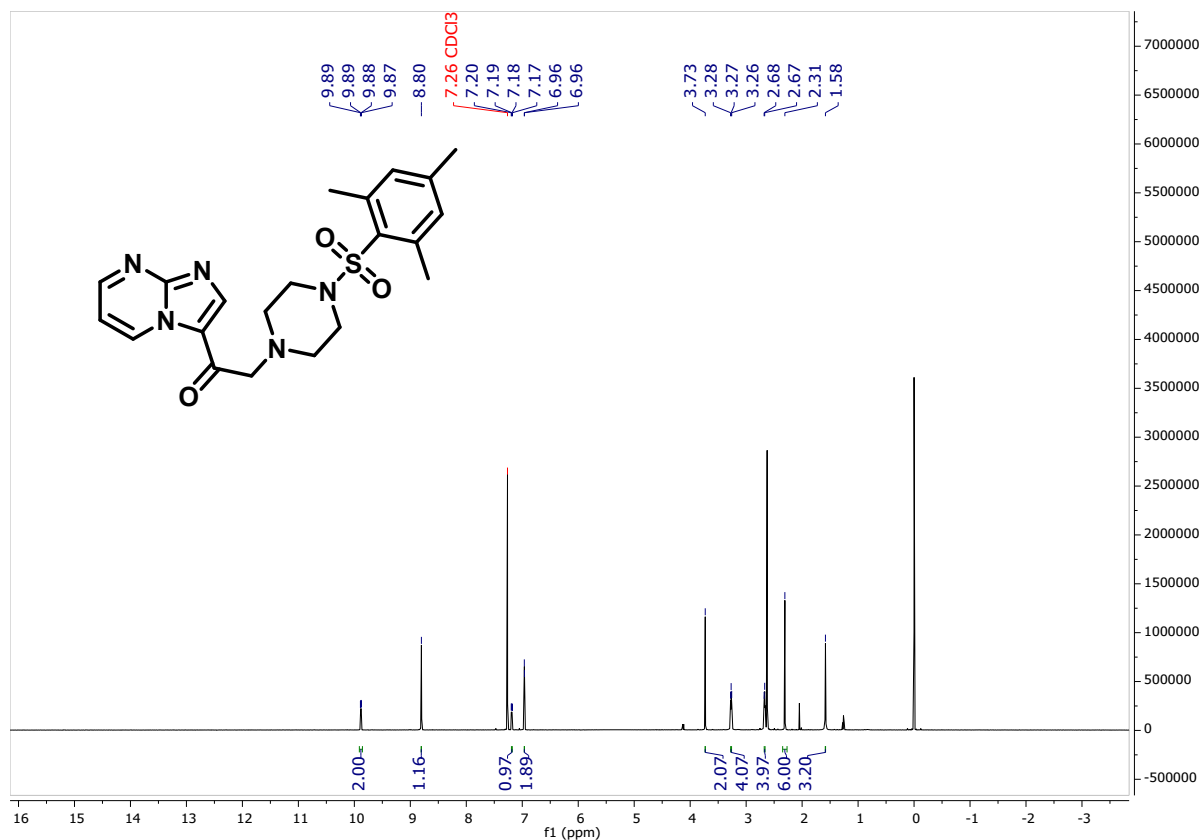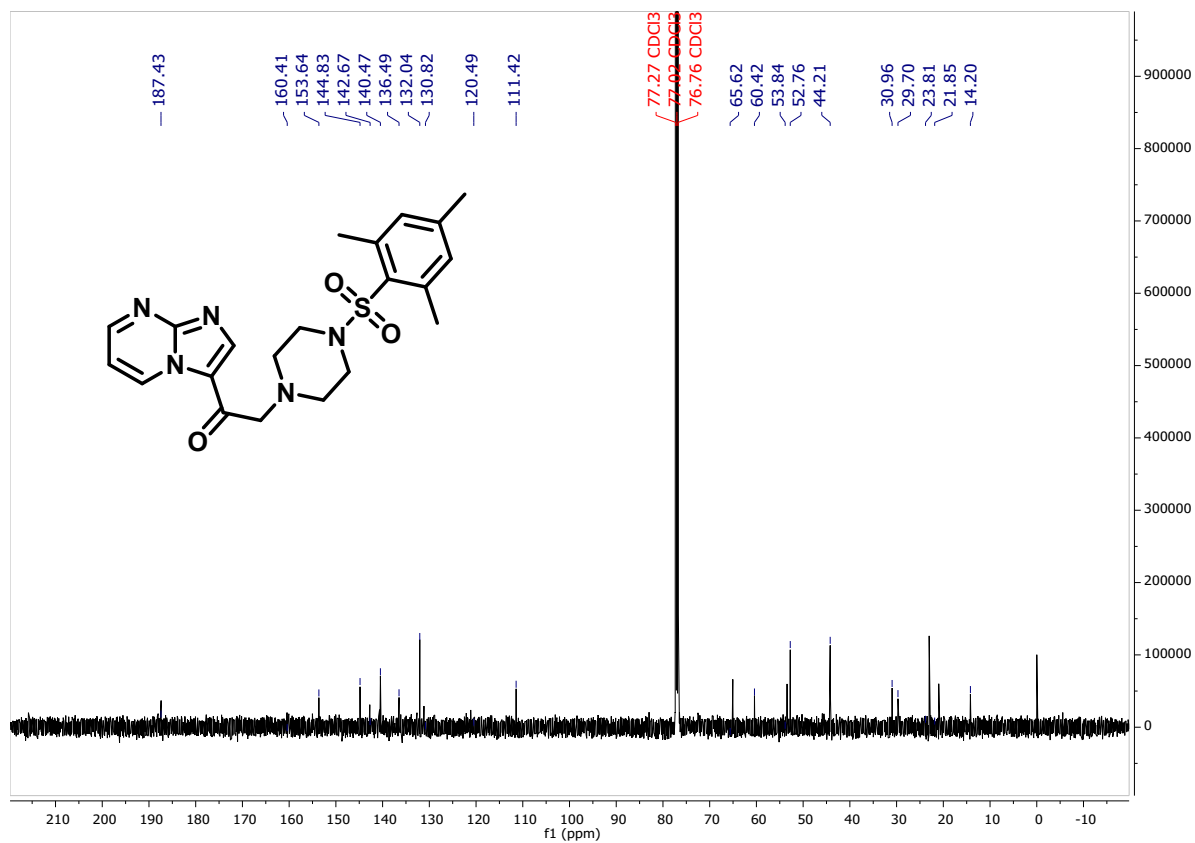

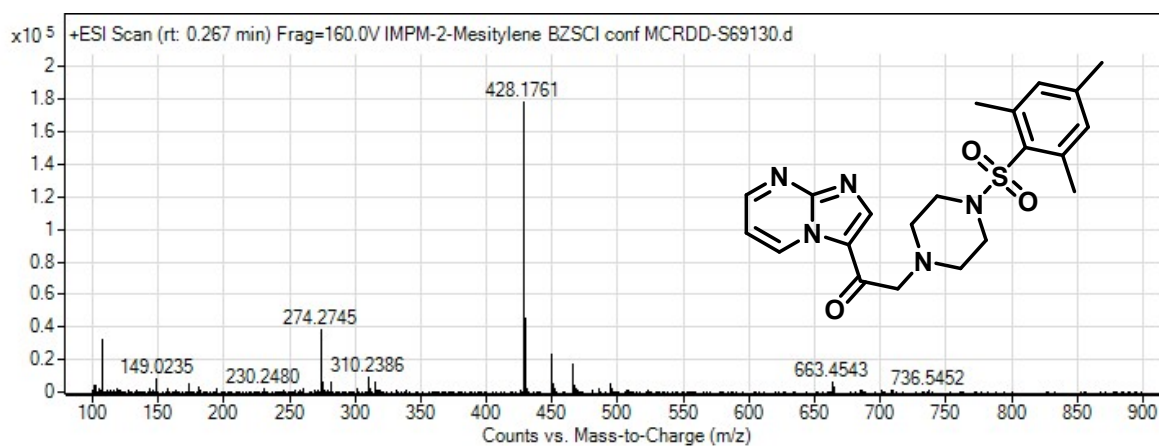

**FIGURE S10: 1-(imidazo[1,2-a]pyrimidin-3-yl)-2-(4-(mesitylsulfonyl)piperazin-1-yl)ethan-1-one (9i) (<sup>1</sup>H NMR, <sup>13</sup>C NMR & HRMS Spectra).**



**11: 2-(4-((3-bromophenyl)sulfonyl)piperazin-1-yl)-1-(imidazo[1,2-a]pyrimidin-3-yl)ethan-1-one (9k)**  
 (<sup>1</sup>H NMR, <sup>13</sup>C NMR & HRMS Spectra)

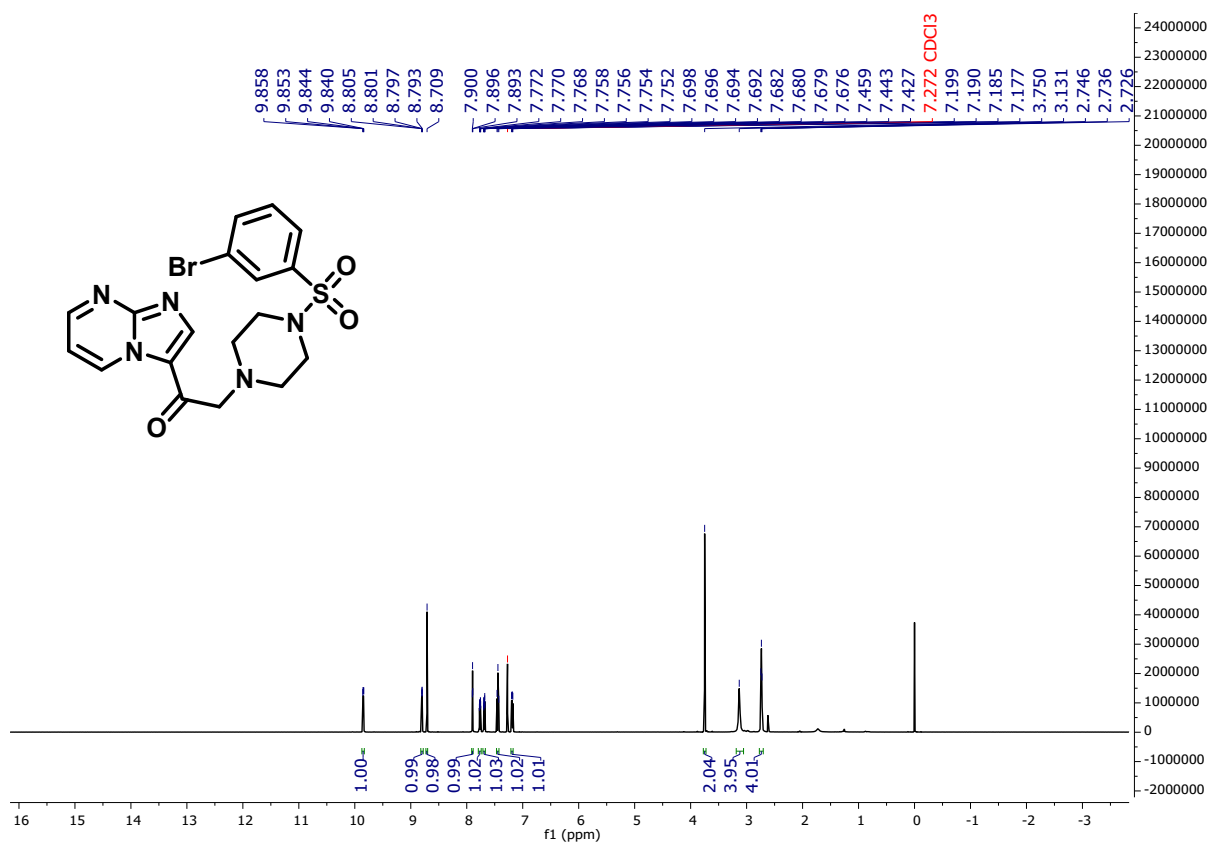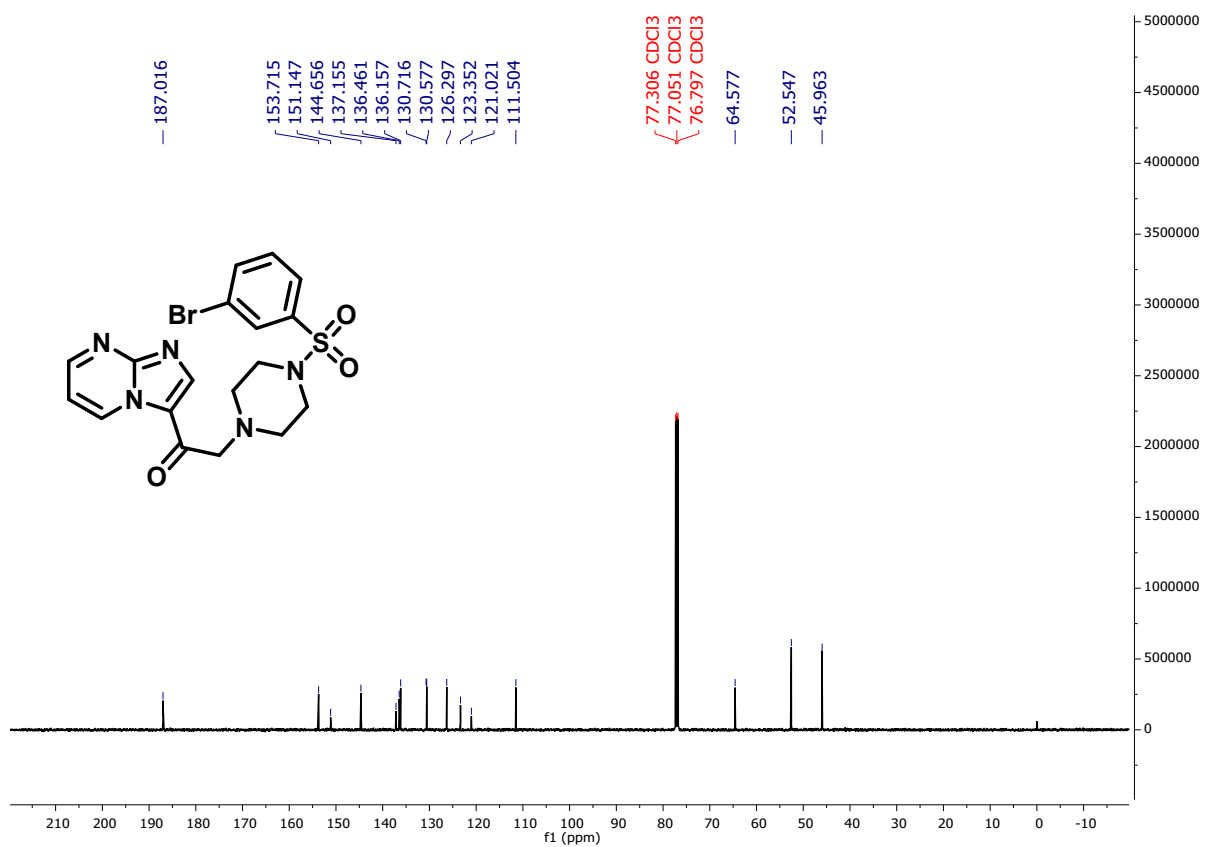

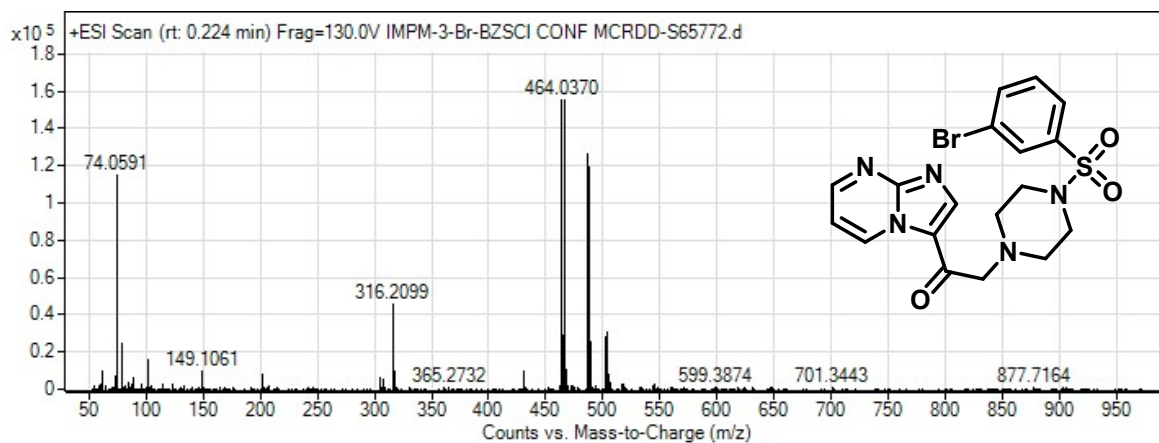

**FIGURE S11:** 2-(4-((3-bromophenyl)sulfonyl)piperazin-1-yl)-1-(imidazo[1,2-a]pyrimidin-3-yl)ethan-1-one (9k) ( $^1\text{H}$  NMR,  $^{13}\text{C}$  NMR & HRMS Spectra).

12: 2-(4-(cyclohexylsulfonyl)piperazin-1-yl)-1-(imidazo[1,2-a]pyrimidin-3-yl)ethan-1-one (**9l**) (<sup>1</sup>H NMR, <sup>13</sup>C NMR & HRMS Spectra)

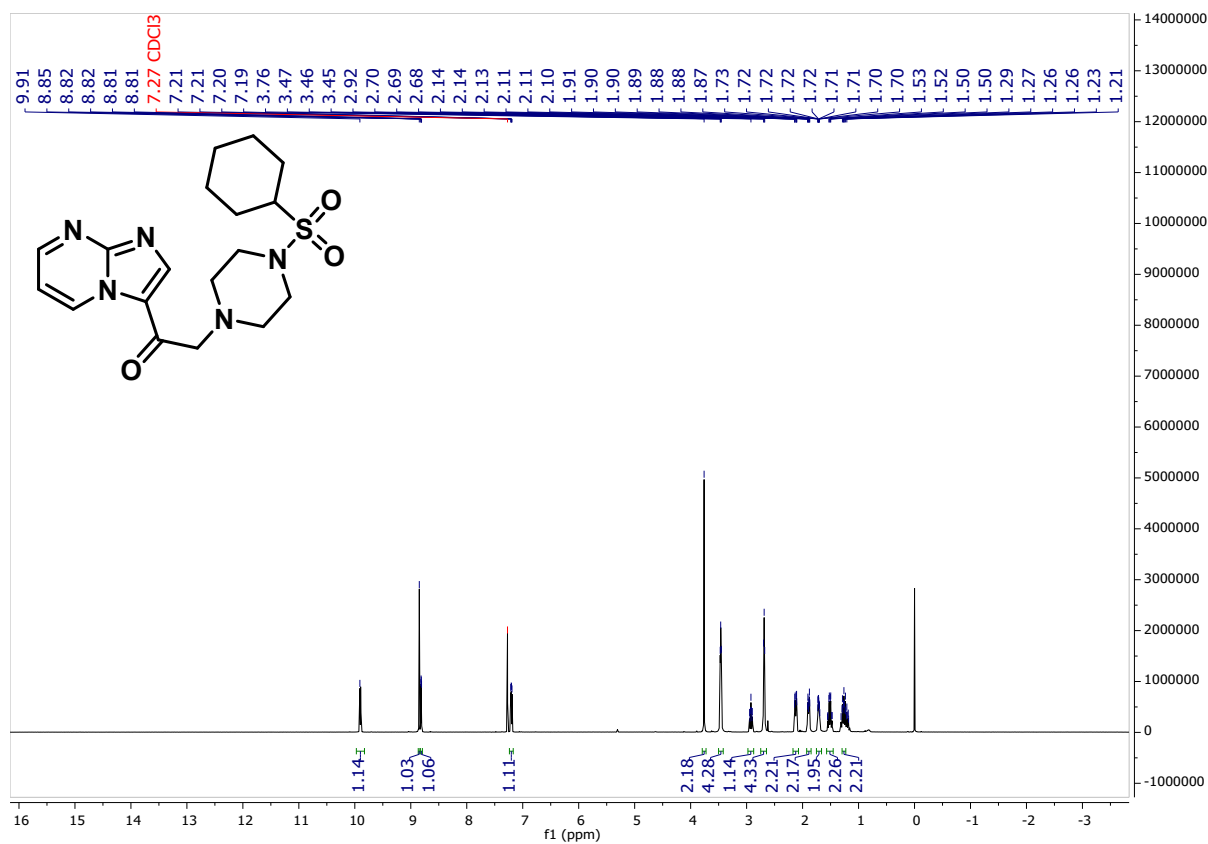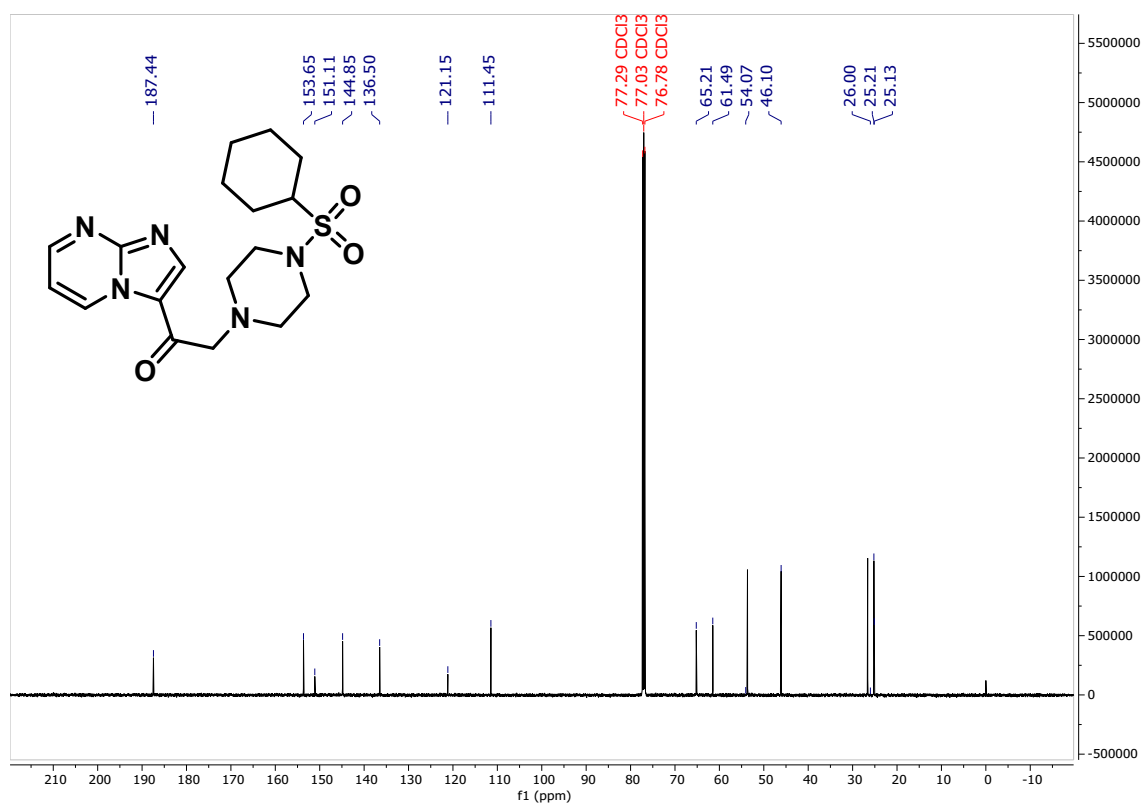

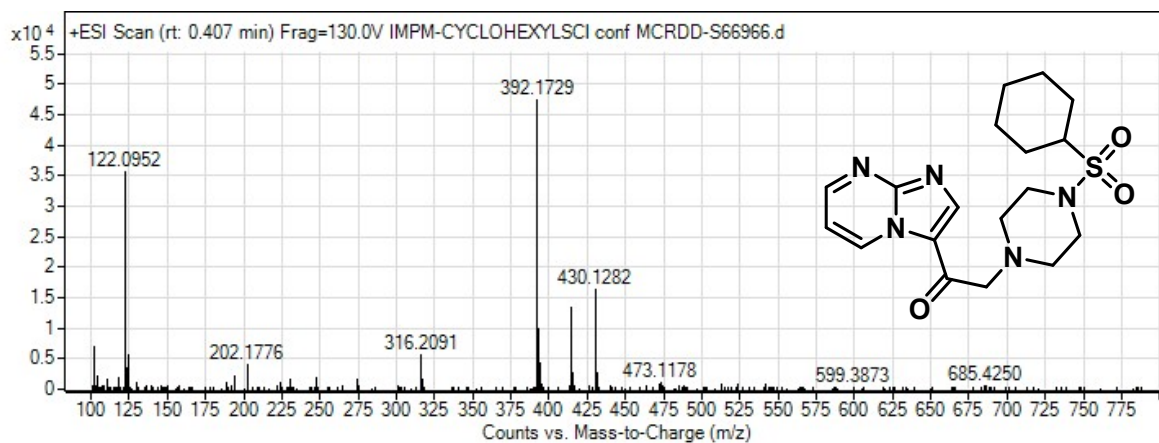

**FIGURE S12:** 2-(4-(cyclohexylsulfonyl)piperazin-1-yl)-1-(imidazo[1,2-a]pyrimidin-3-yl)ethan-1-one (9I) ( $^1\text{H}$  NMR,  $^{13}\text{C}$  NMR & HRMS Spectra).

**13: 2-(4-((5-bromothiophen-2-yl)sulfonyl)piperazin-1-yl)-1-(imidazo[1,2-a]pyrimidin-3-yl)ethan-1-one (9m) (<sup>1</sup>H NMR, <sup>13</sup>C NMR & HRMS Spectra)**

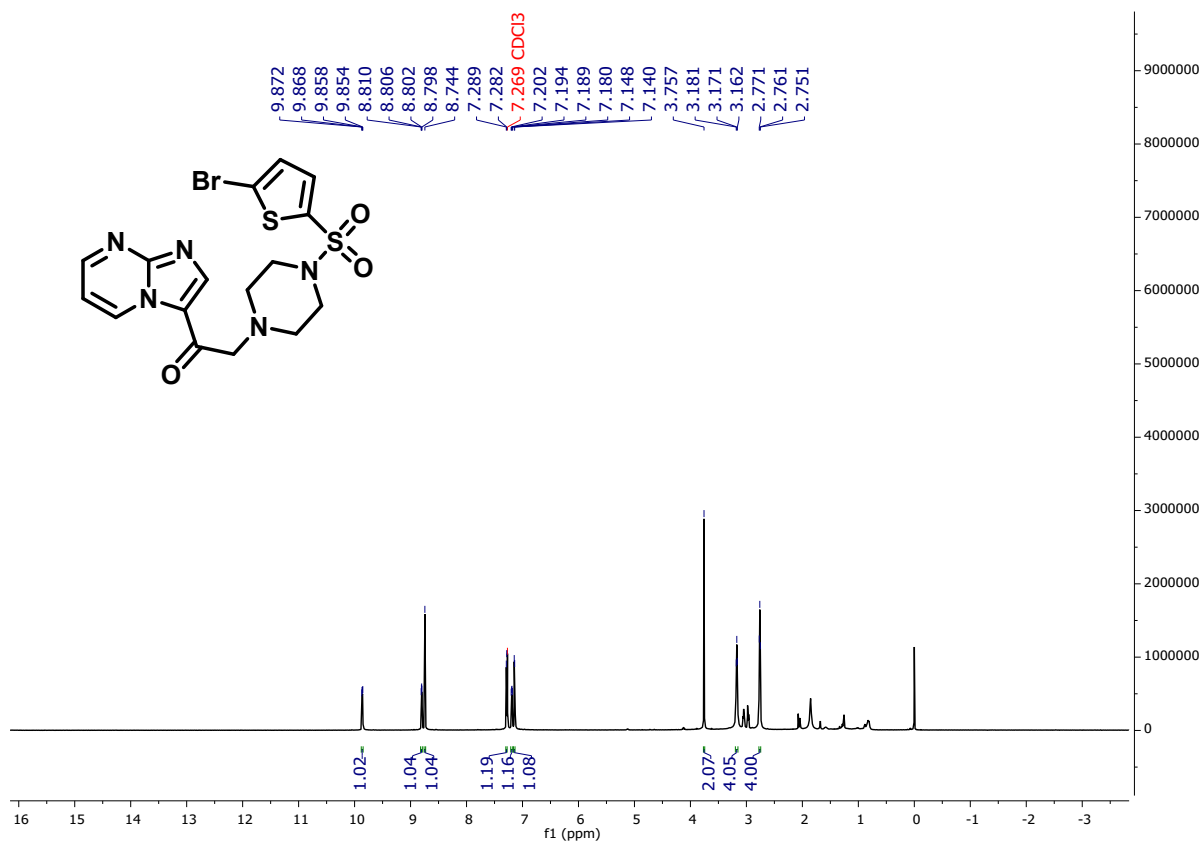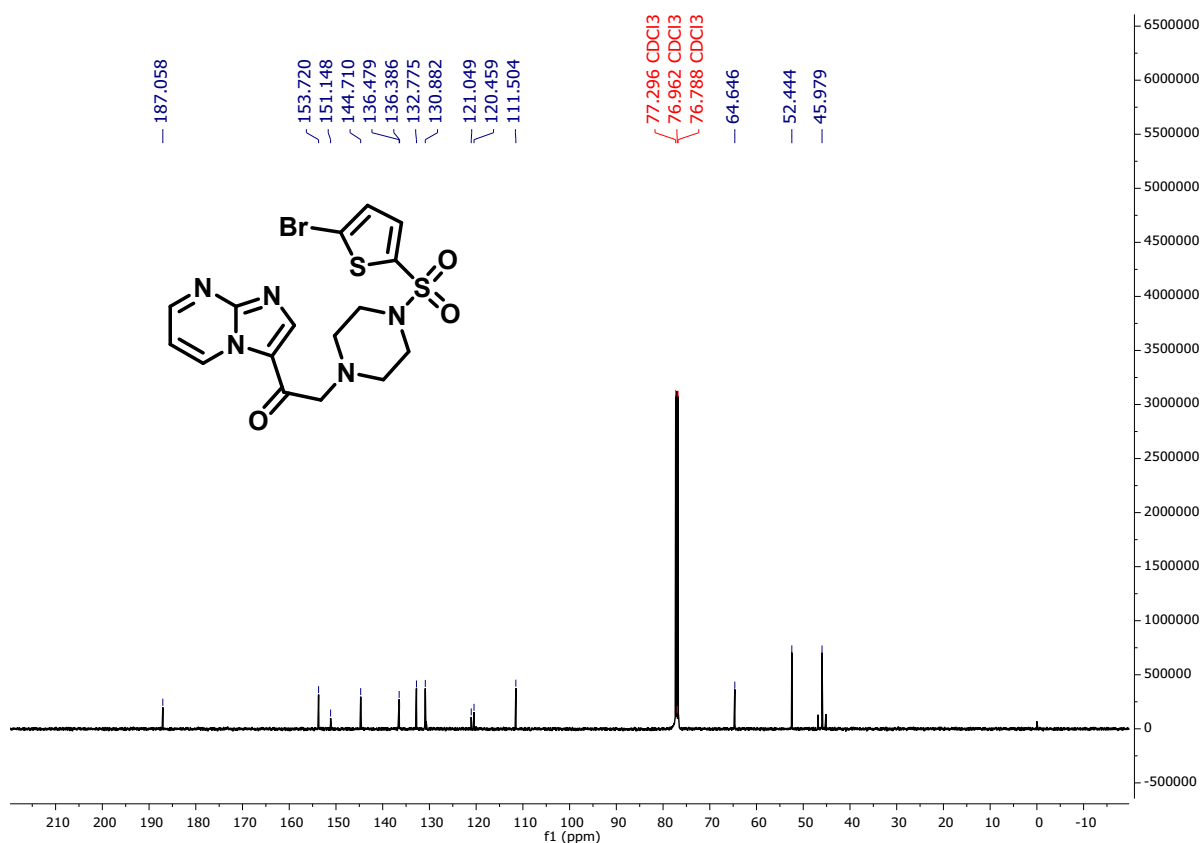

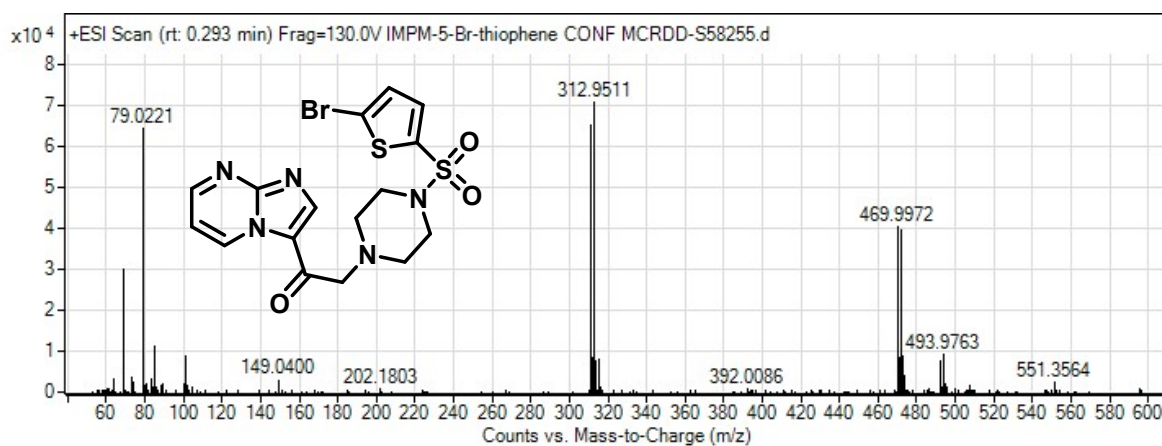

**FIGURE S13: 2-(4-((5-bromothiophen-2-yl)sulfonyl)piperazin-1-yl)-1-(imidazo[1,2-a]pyrimidin-3-yl)ethan-1-one (9m) (<sup>1</sup>H NMR, <sup>13</sup>C NMR & HRMS Spectra).**

14: 2-(4-((5-chlorothiophen-2-yl)sulfonyl)piperazin-1-yl)-1-(imidazo[1,2-a]pyrimidin-3-yl)ethan-1-one (9q) (<sup>1</sup>H NMR, <sup>13</sup>C NMR & HRMS Spectra)

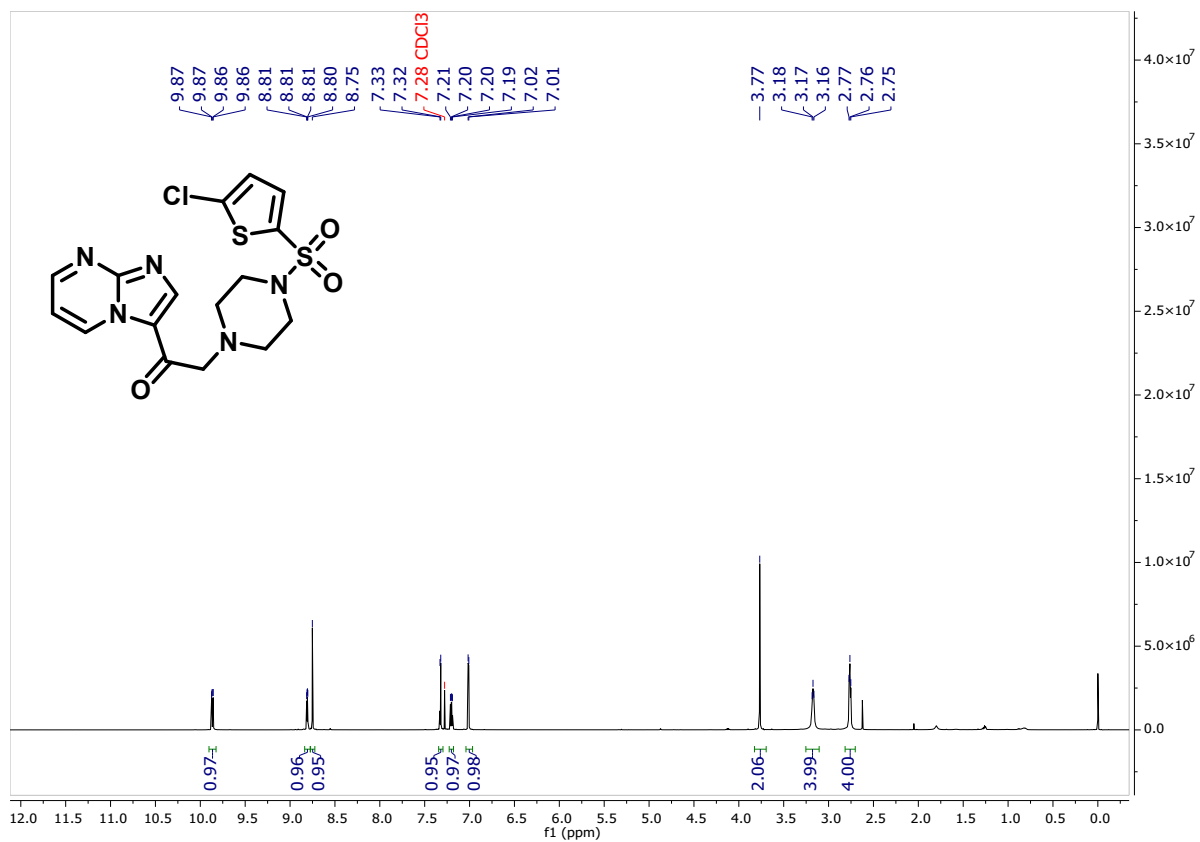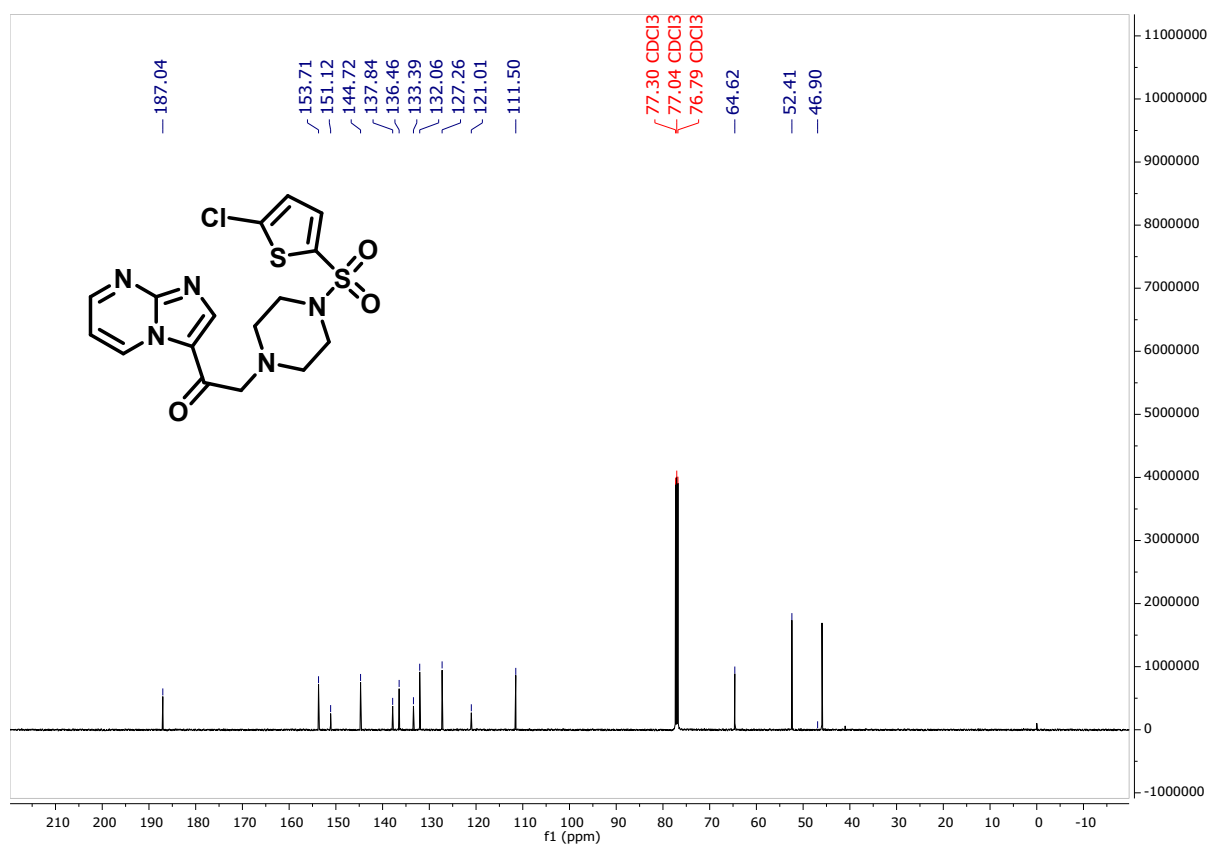

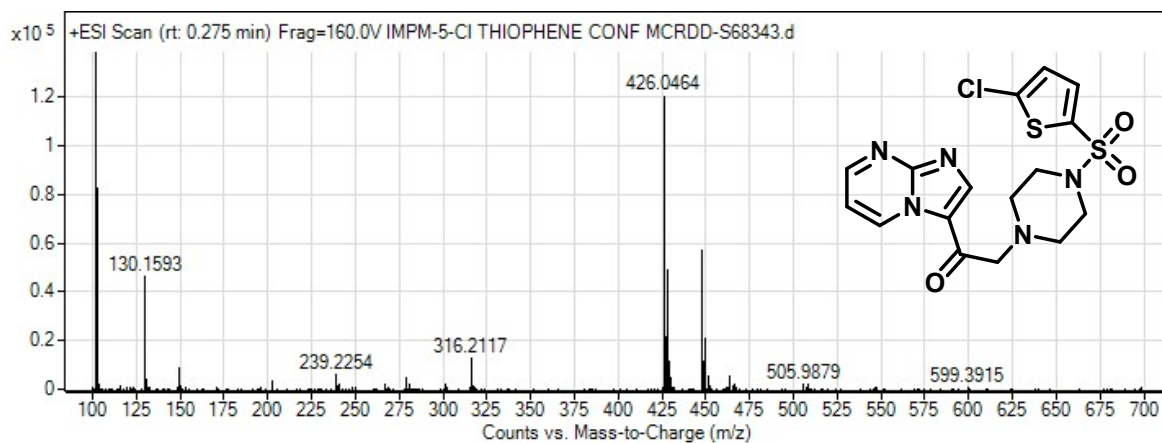

**FIGURE S14: 2-(4-((5-chlorothiophen-2-yl)sulfonyl)piperazin-1-yl)-1-(imidazo[1,2-a]pyrimidin-3-yl)ethan-1-one (9q) ( $^1\text{H}$  NMR,  $^{13}\text{C}$  NMR & HRMS Spectra).**



15: 2-(4-(cyclopropylsulfonyl)piperazin-1-yl)-1-(imidazo[1,2-a]pyrimidin-3-yl)ethan-1-one (**9n**) (<sup>1</sup>H NMR, <sup>13</sup>C NMR & HRMS Spectra)

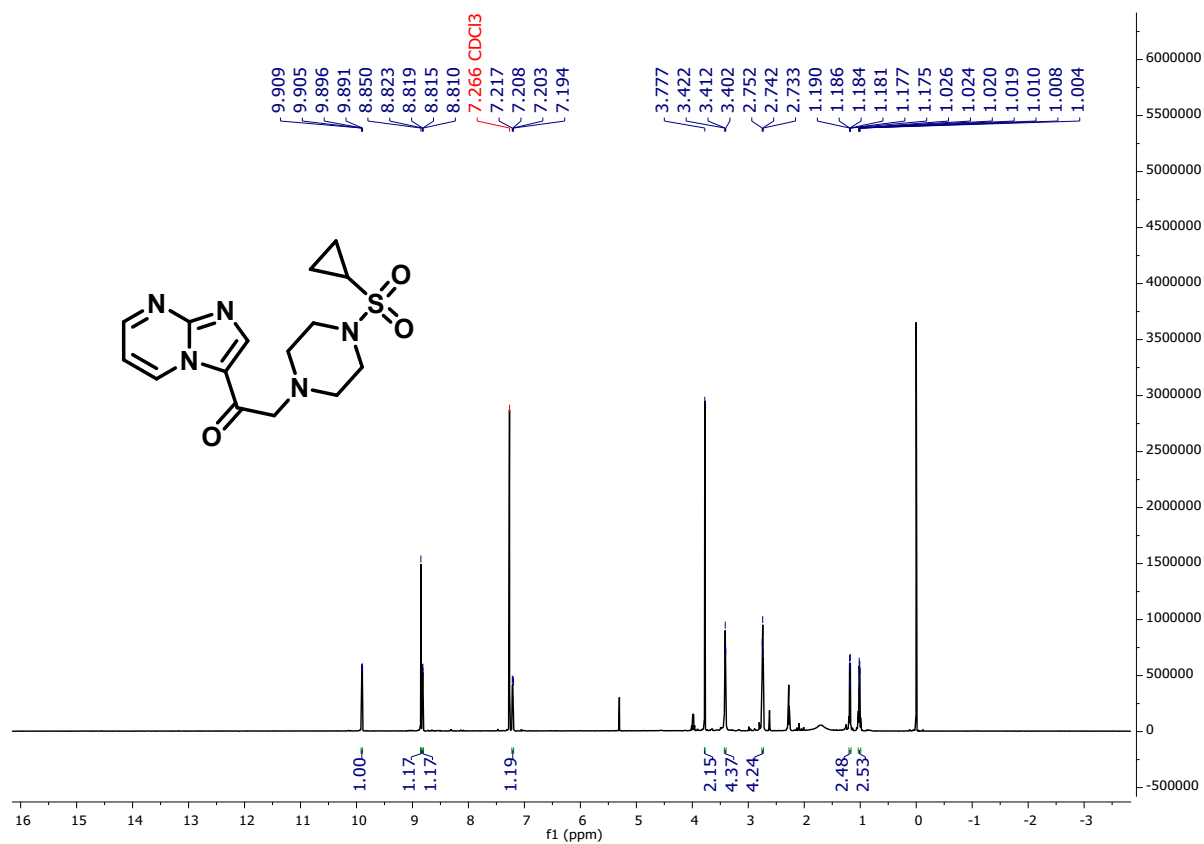

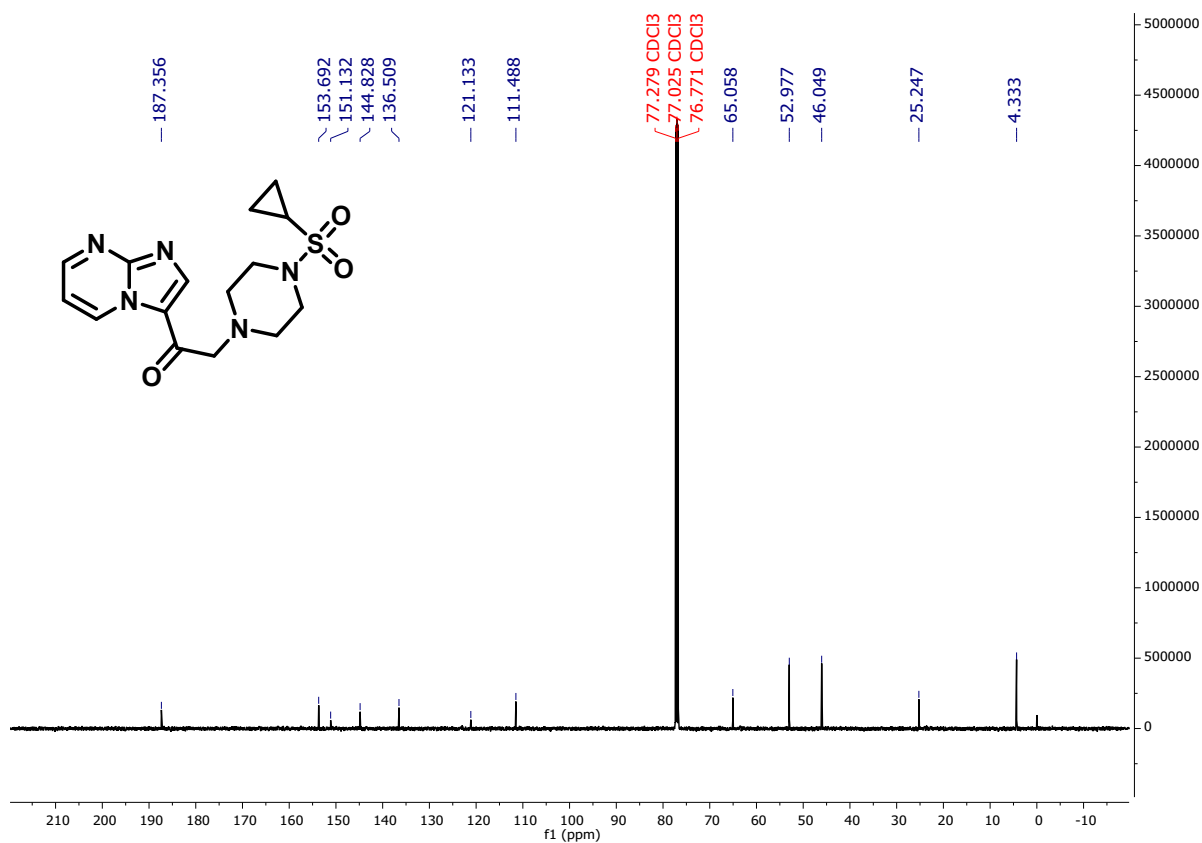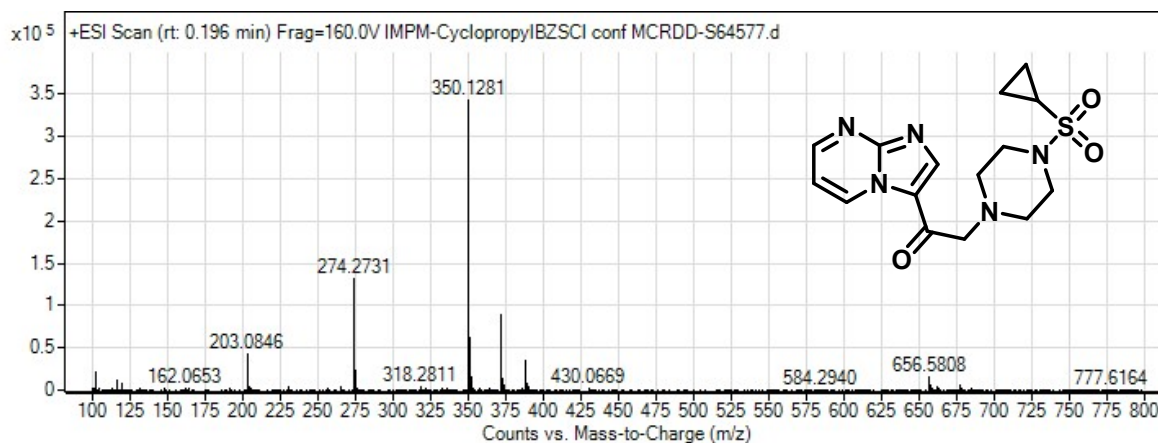

**FIGURE S15: 2-(4-(cyclopropylsulfonyl)piperazin-1-yl)-1-(imidazo[1,2-a]pyrimidin-3-yl)ethan-1-one (9n) (<sup>1</sup>H NMR, <sup>13</sup>C NMR & HRMS Spectra).**

16: 2-((4-(2-(imidazo[1,2-a]pyrimidin-3-yl)-2-oxoethyl)piperazin-1-yl)sulfonyl)benzotrile (9o) (<sup>1</sup>H NMR, <sup>13</sup>C NMR & HRMS Spectra)

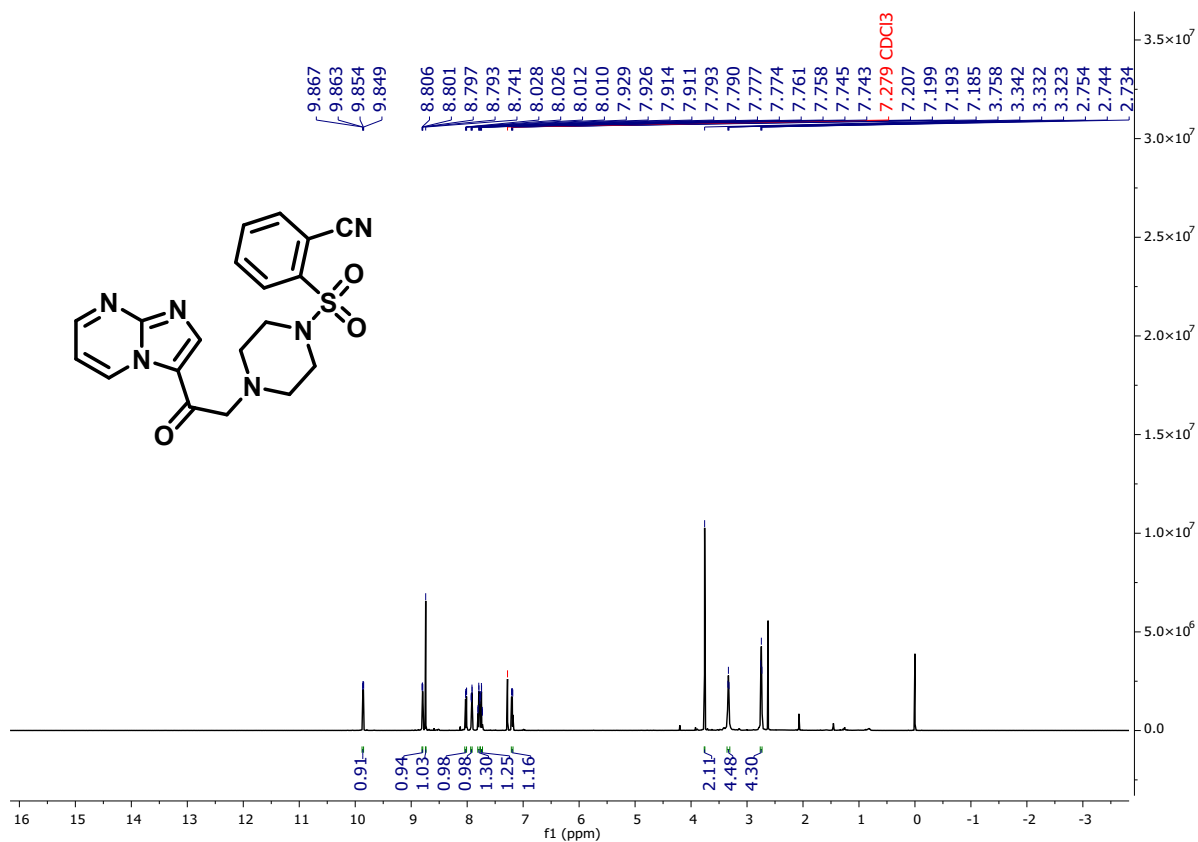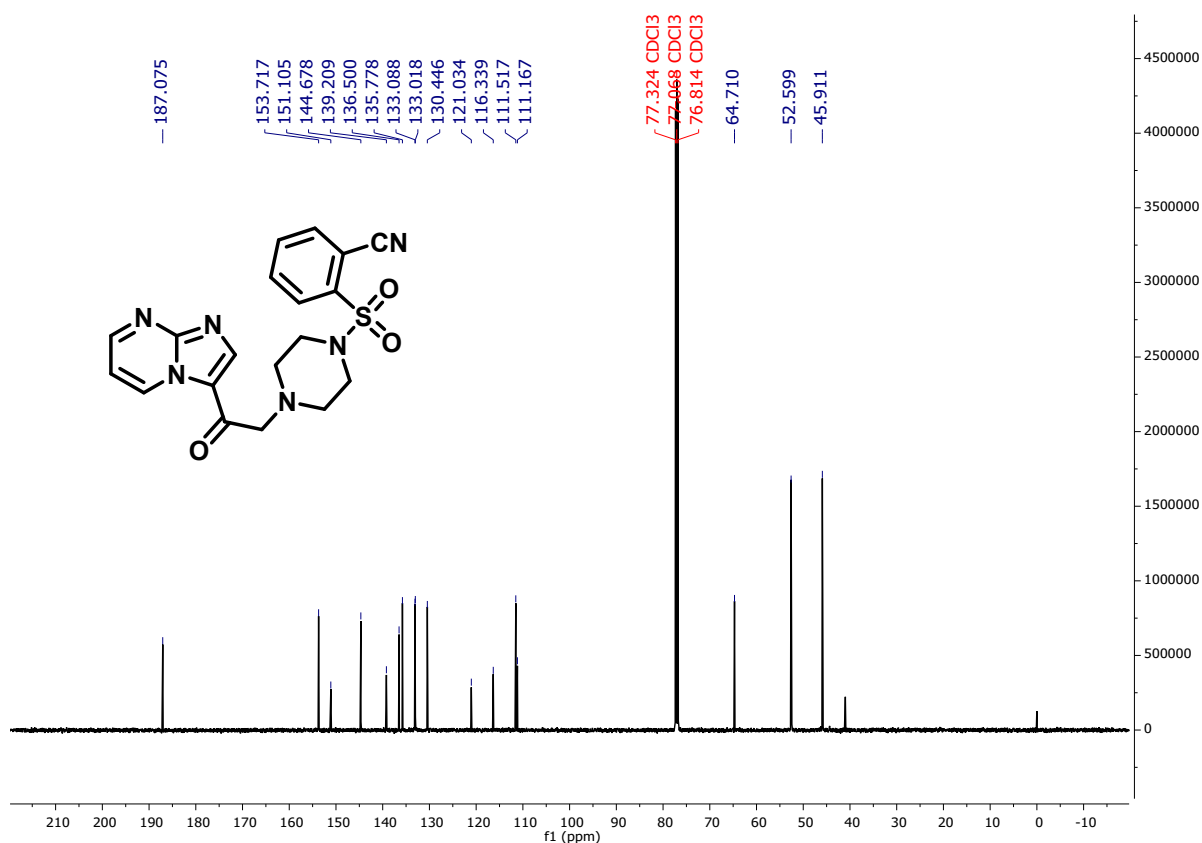

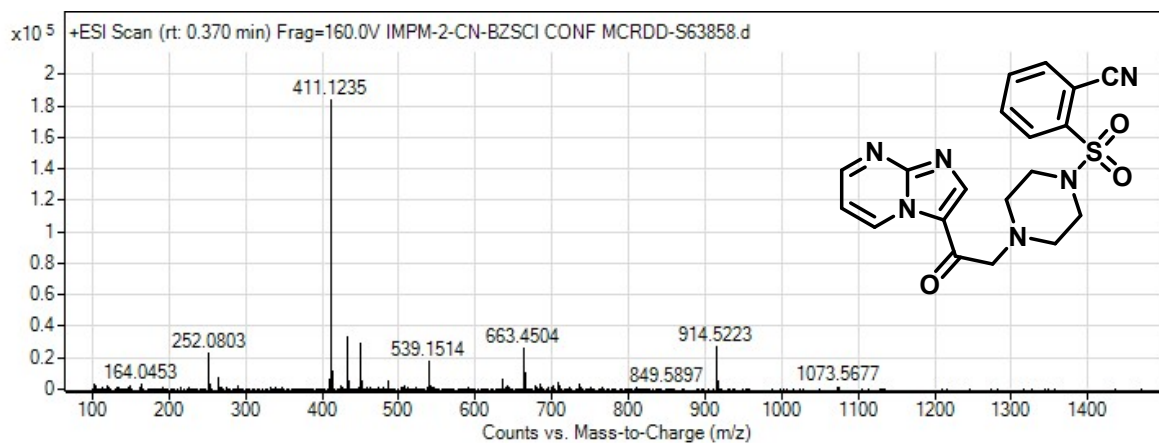

**FIGURE S16:** 2-((4-(2-(imidazo[1,2-a]pyrimidin-3-yl)-2-oxoethyl)piperazin-1-yl)sulfonyl)benzotrile (9o) ( $^1\text{H}$  NMR,  $^{13}\text{C}$  NMR & HRMS Spectra).

17: 1-(imidazo[1,2-a]pyrimidin-3-yl)-2-(4-((4'-methoxy-[1,1'-biphenyl]-4-yl)sulfonyl)piperazin-1-yl)ethan-1-one (9r) (<sup>1</sup>H NMR, <sup>13</sup>C NMR & HRMS Spectra)

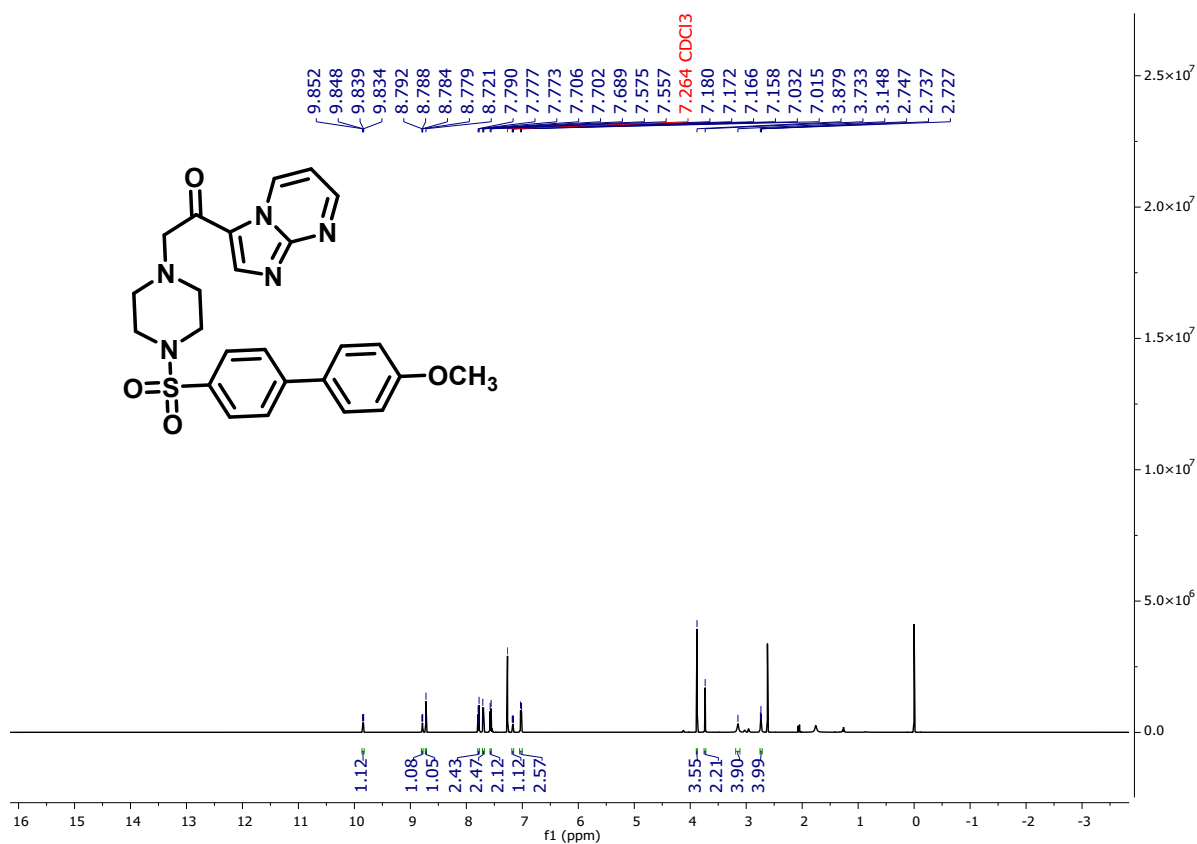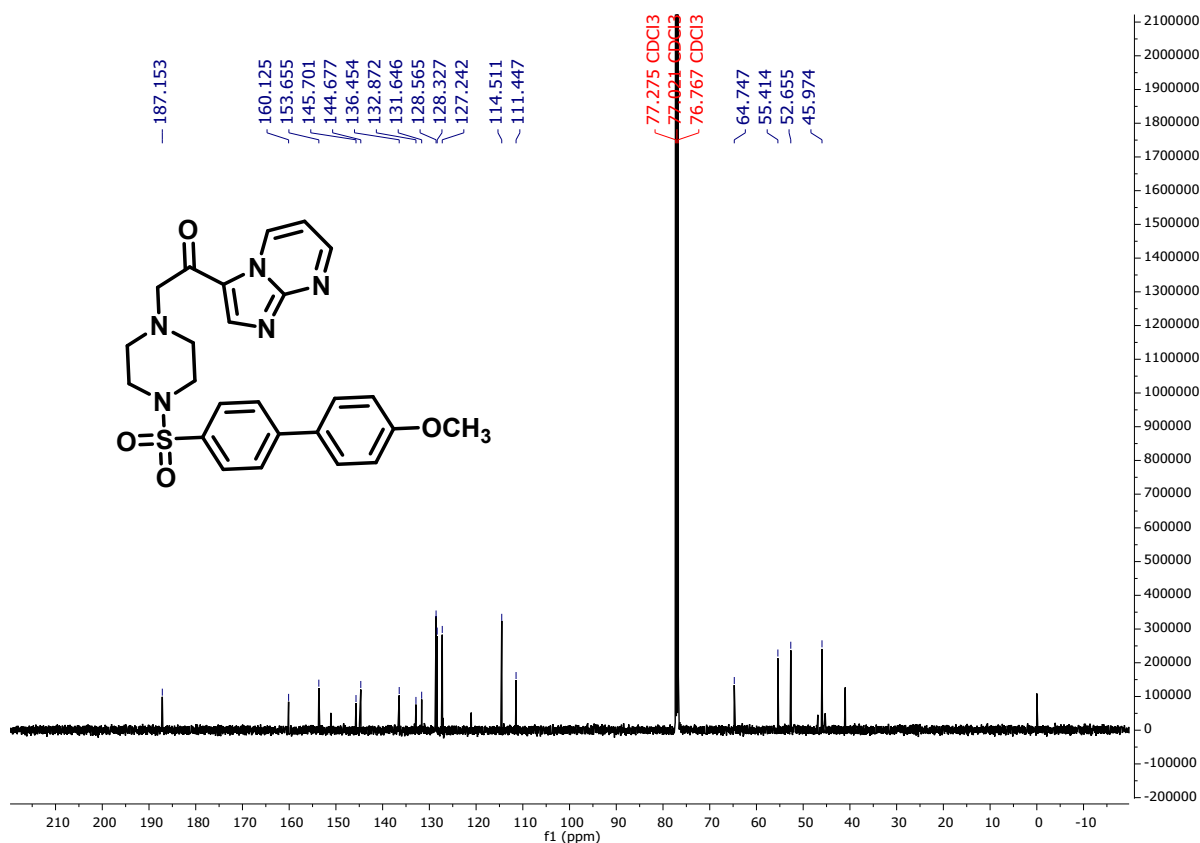

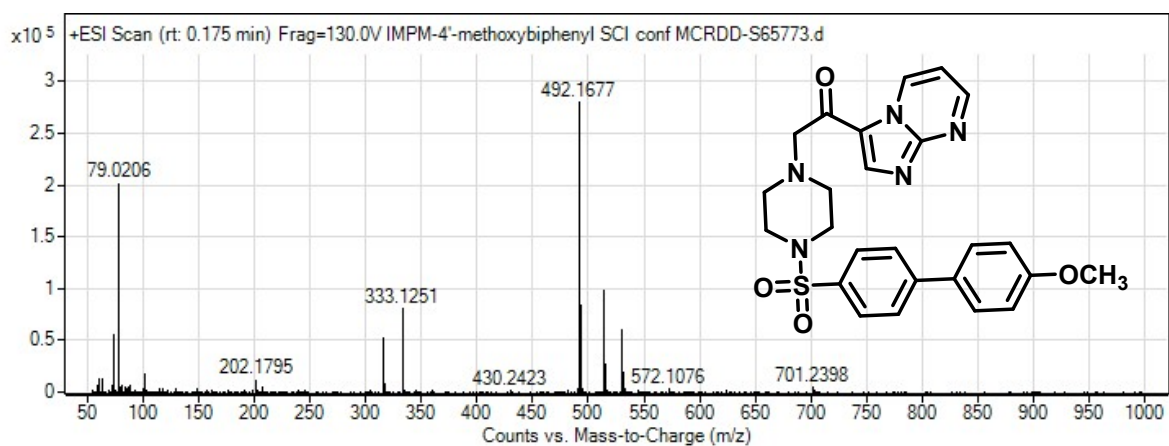

**FIGURE S17:** 1-(imidazo[1,2-a]pyrimidin-3-yl)-2-(4-((4'-methoxy-[1,1'-biphenyl]-4-yl)sulfonyl)piperazin-1-yl)ethan-1-one (9r) (<sup>1</sup>H NMR, <sup>13</sup>C NMR & HRMS Spectra).

18: 1-(imidazo[1,2-a]pyrimidin-3-yl)-2-(4-((4-nitrophenyl)sulfonyl)piperazin-1-yl)ethan-1-one (9s)

(<sup>1</sup>H NMR, <sup>13</sup>C NMR & HRMS Spectra)

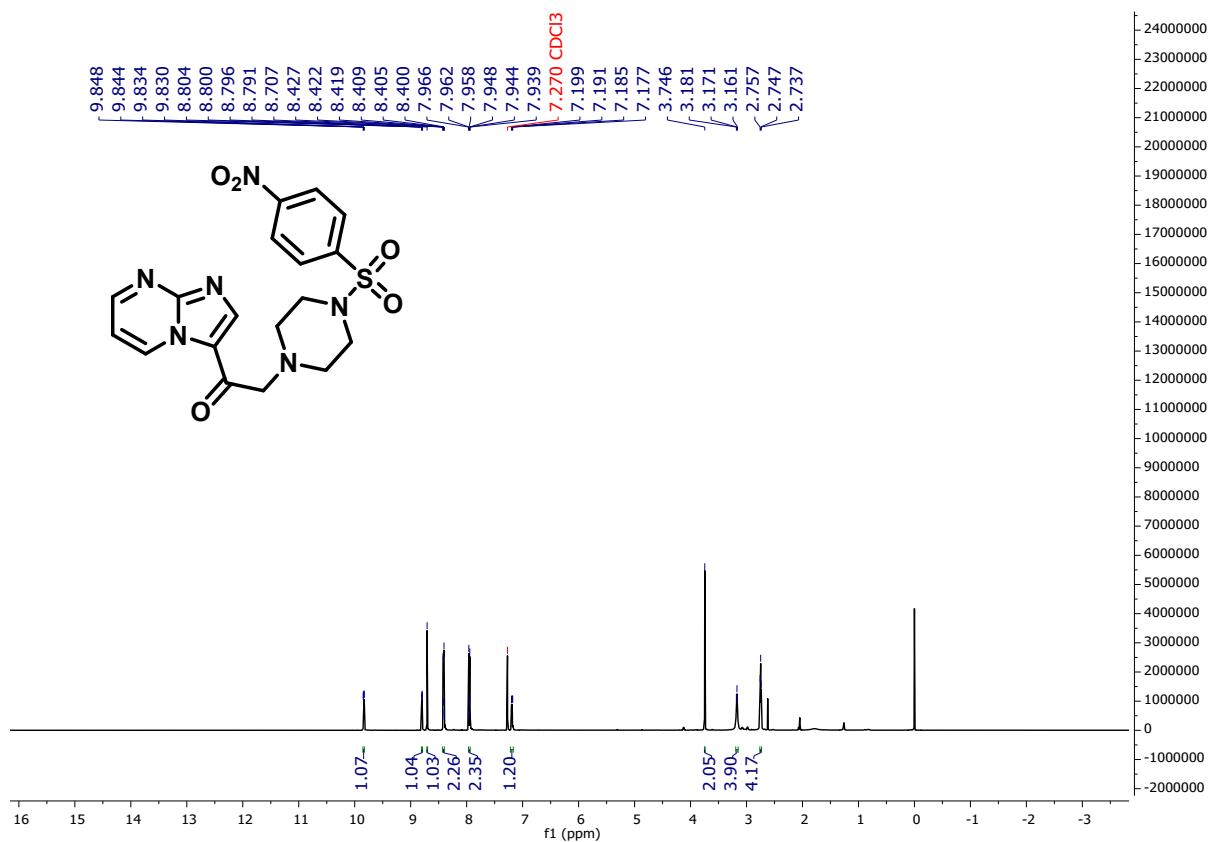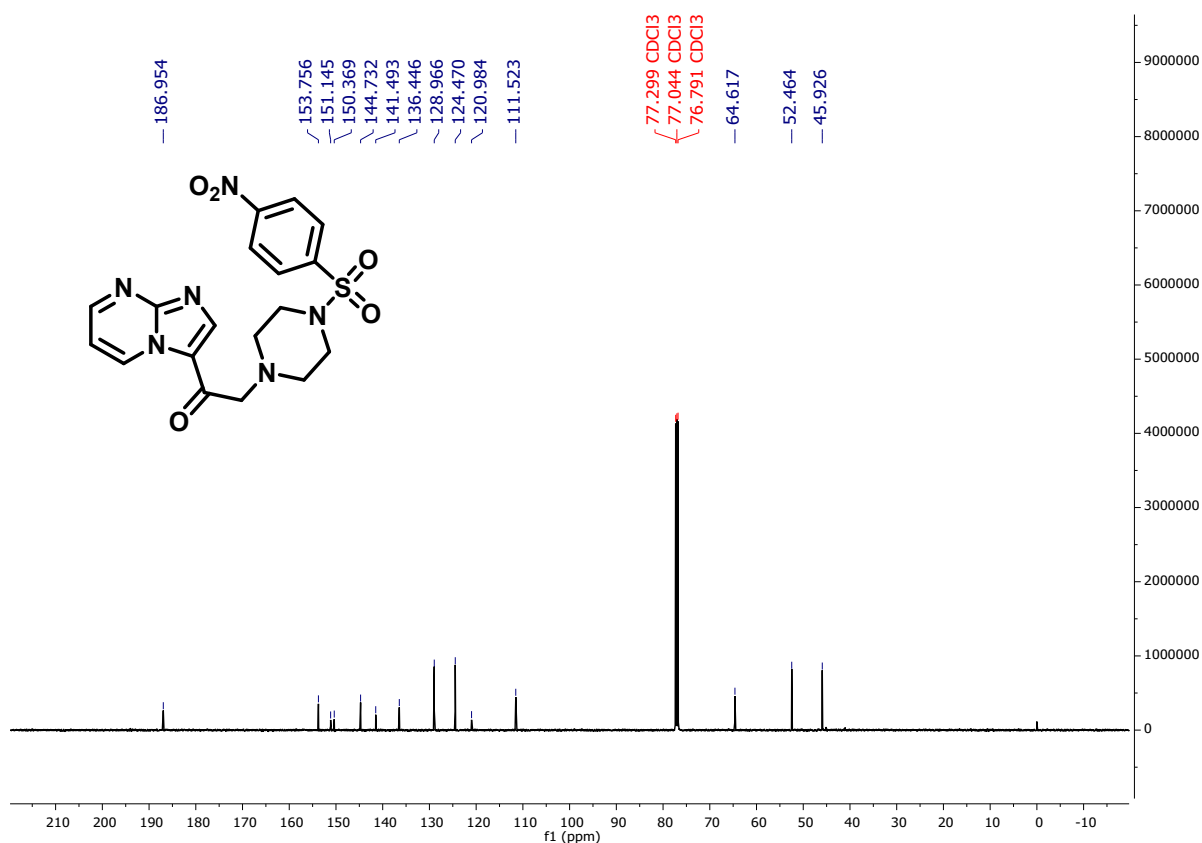

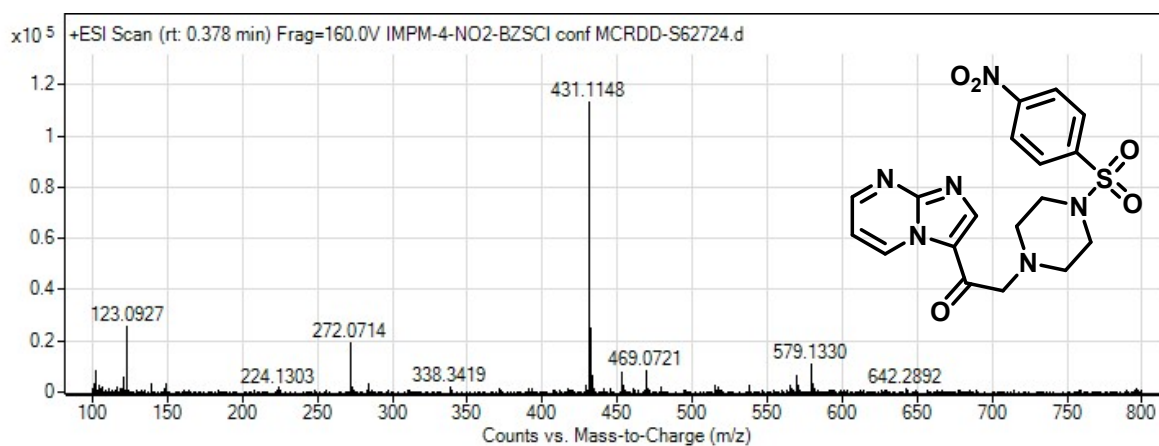

**FIGURE S18:** 1-(imidazo[1,2-a]pyrimidin-3-yl)-2-(4-((4-nitrophenyl)sulfonyl)piperazin-1-yl)ethan-1-one (9s) ( $^1\text{H}$  NMR,  $^{13}\text{C}$  NMR & HRMS Spectra).



19: 2-(4-((2-chloro-4-fluorophenyl)sulfonyl)piperazin-1-yl)-1-(imidazo[1,2-a]pyrimidin-3-yl)ethan-1-one (9p) (<sup>1</sup>H NMR, <sup>13</sup>C NMR, <sup>19</sup>F NMR & HRMS Spectra)

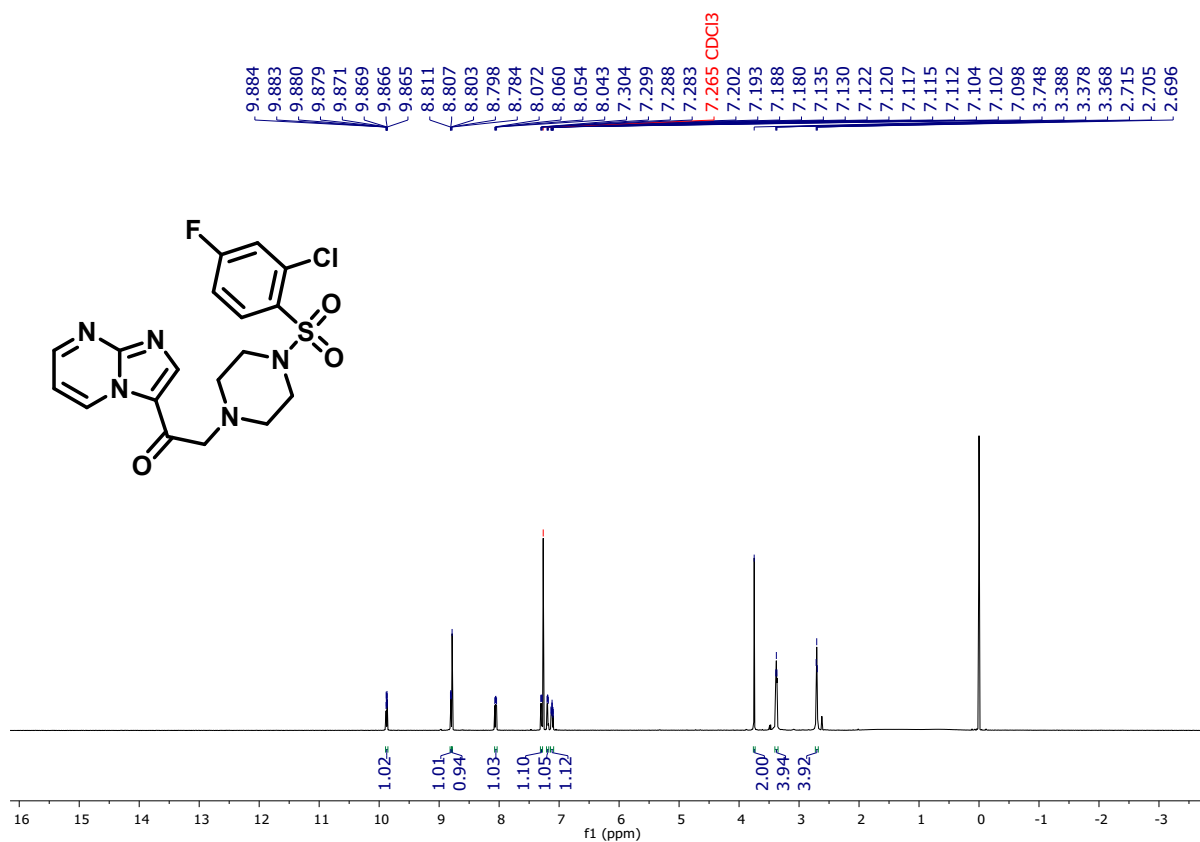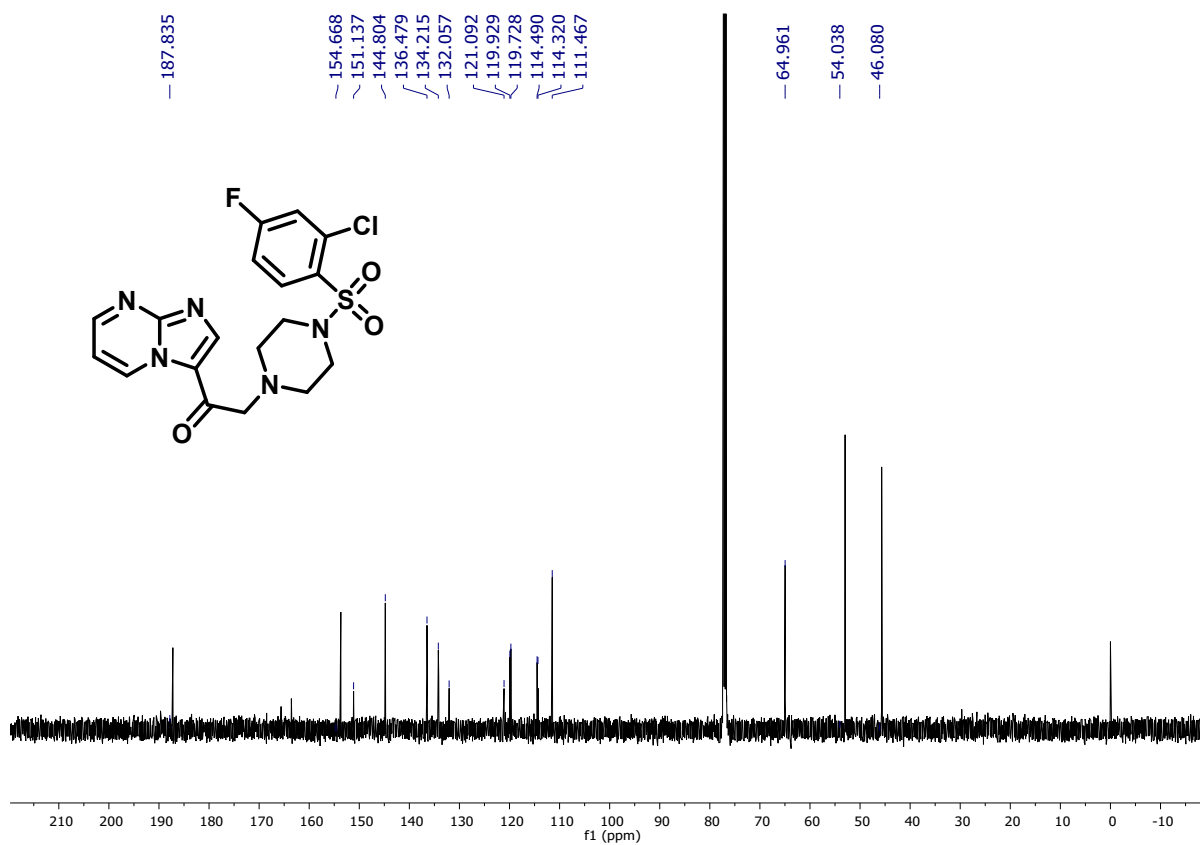

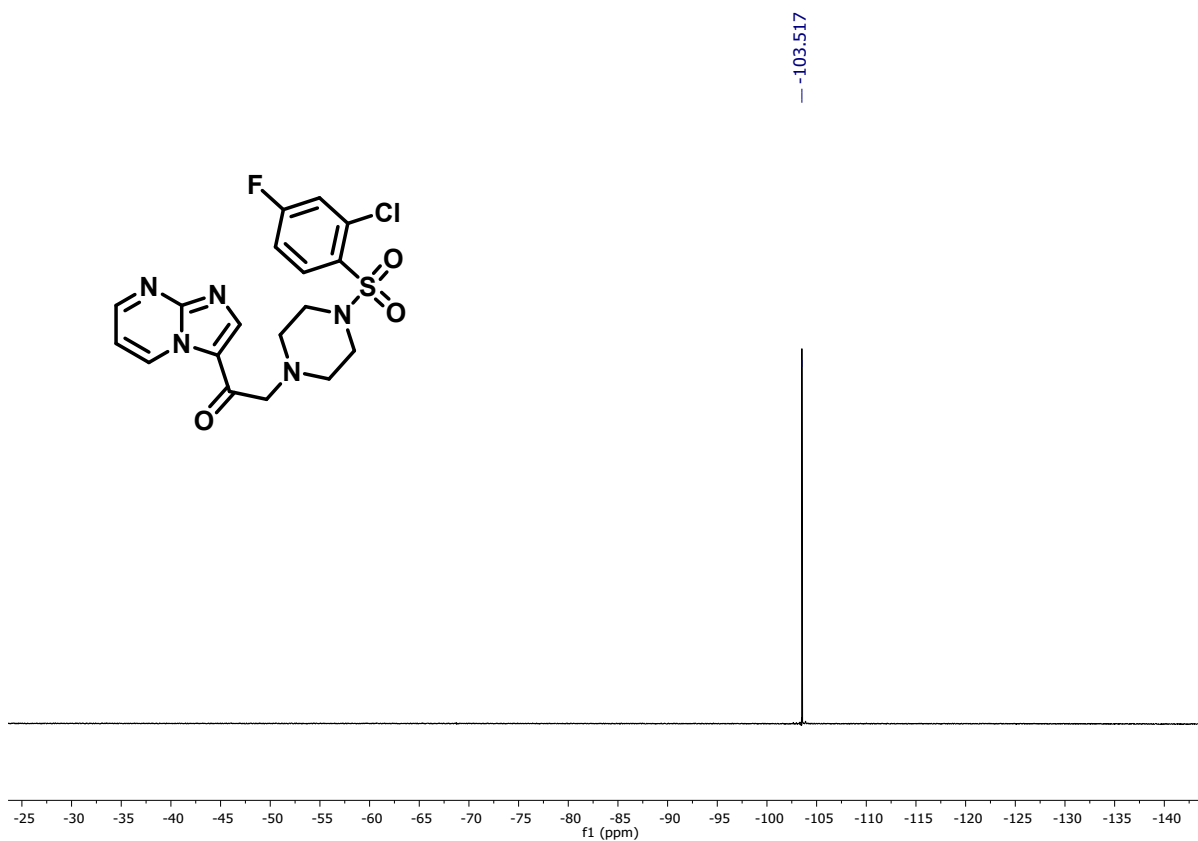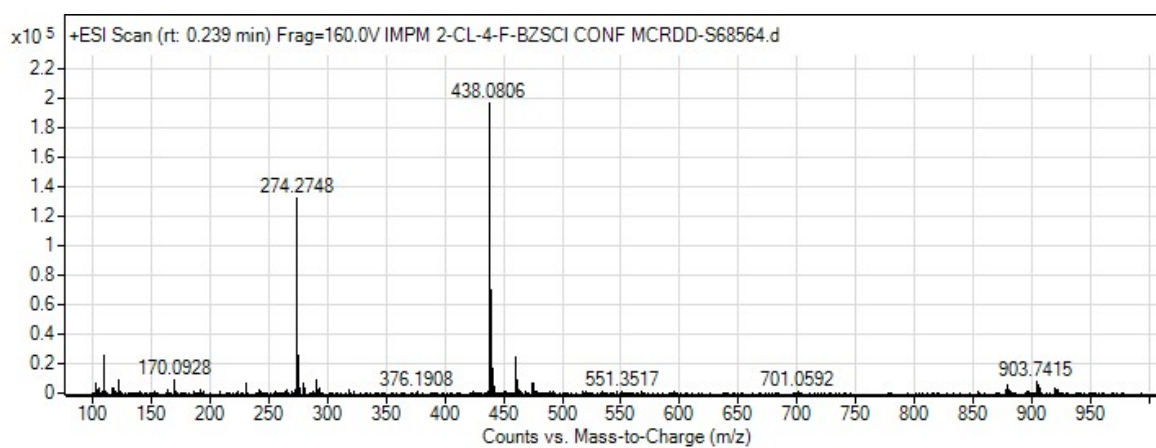

**FIGURE S19: 2-(4-((2-chloro-4-fluorophenyl)sulfonyl)piperazin-1-yl)-1-(imidazo[1,2-a]pyrimidin-3-yl)ethan-1-one (9p) (<sup>1</sup>H NMR, <sup>13</sup>C NMR, <sup>19</sup>F NMR & HRMS Spectra).**

20: 1-(imidazo[1,2-a]pyridin-3-yl)-2-(4-tosylpiperazin-1-yl)ethan-1-one (10a) (<sup>1</sup>H NMR, <sup>13</sup>C NMR & HRMS Spectra)

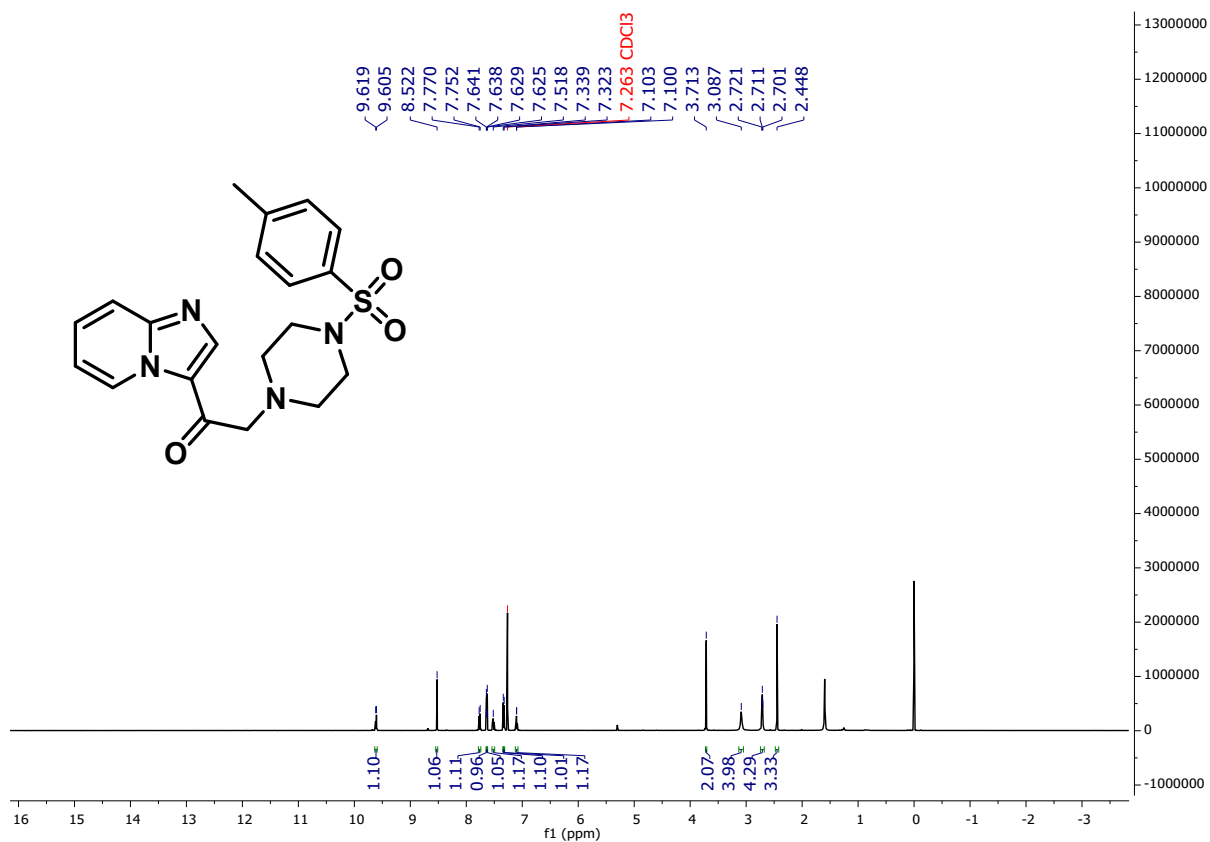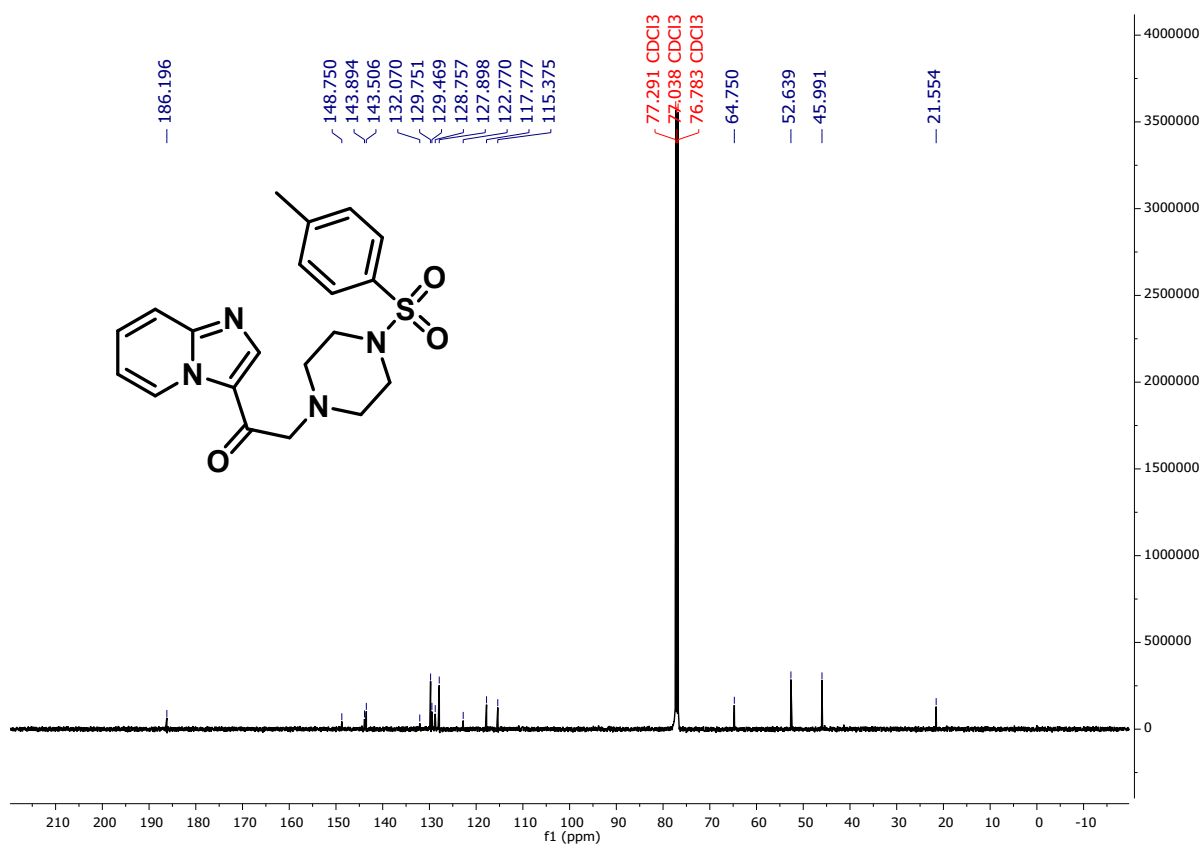

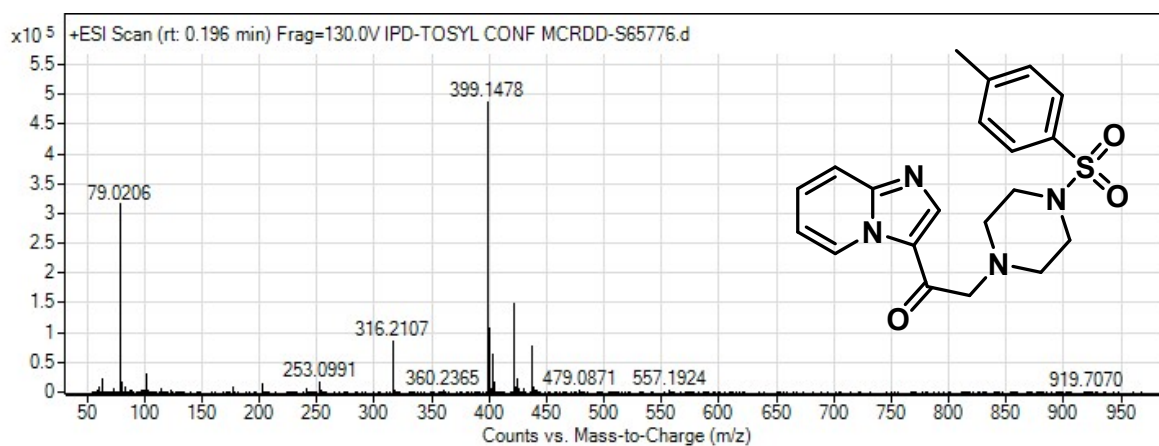

**FIGURE S20: 1-(imidazo[1,2-a]pyridin-3-yl)-2-(4-tosylpiperazin-1-yl)ethan-1-one (10a) ( $^1\text{H}$  NMR,  $^{13}\text{C}$  NMR & HRMS Spectra).**

**21: 2-(4-((2,5-dichlorophenyl)sulfonyl)piperazin-1-yl)-1-(imidazo[1,2-a]pyridin-3-yl)ethan-1-one**  
**(10h) (<sup>1</sup>H NMR, <sup>13</sup>C NMR & HRMS Spectra)**

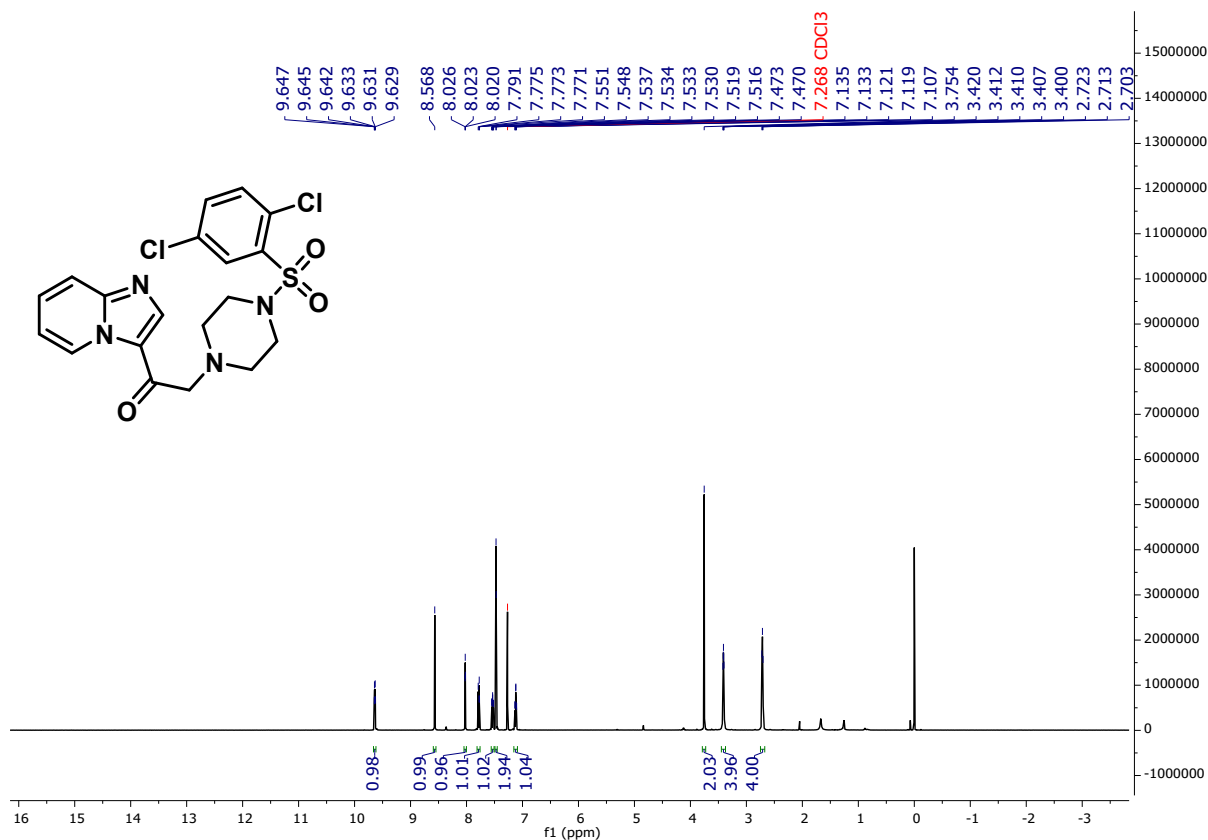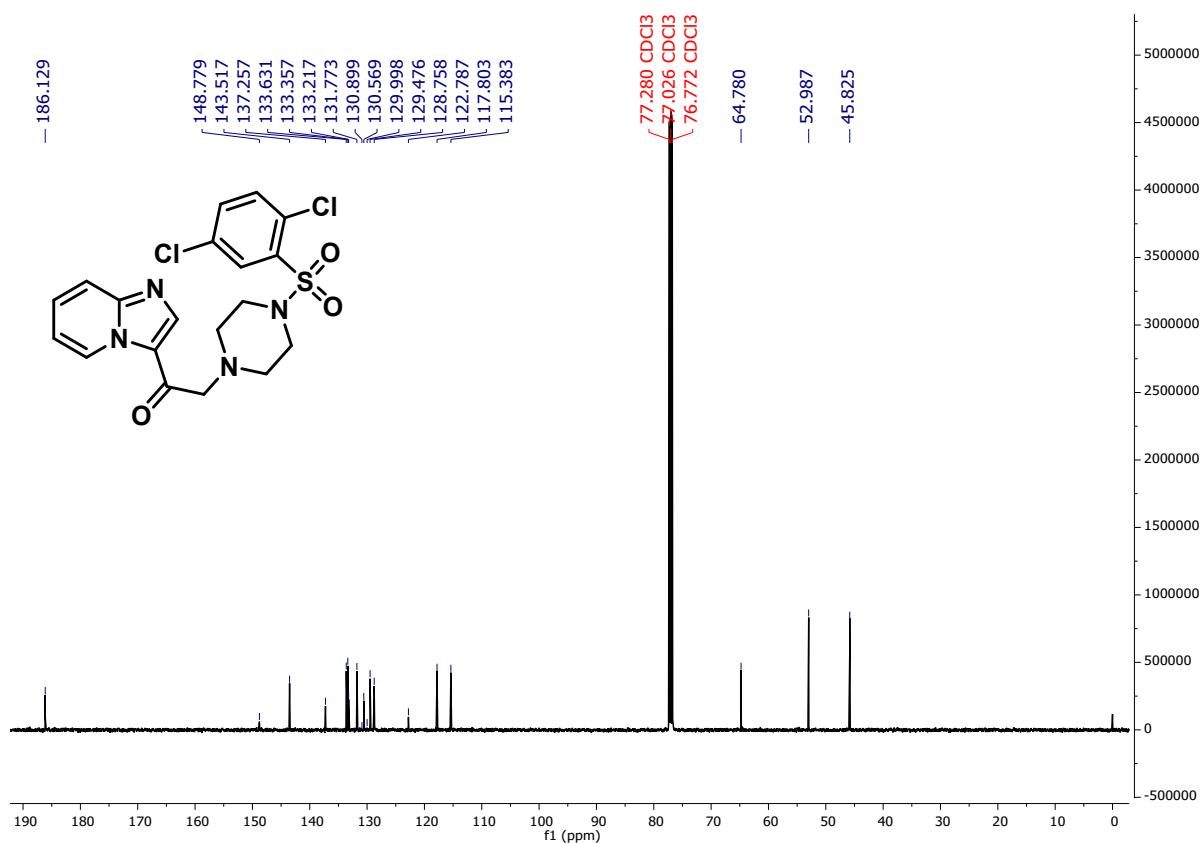

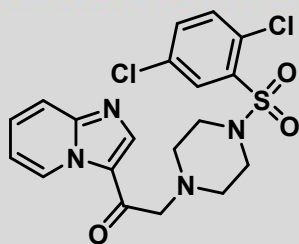

**FIGURE S21:** 2-(4-((2,5-dichlorophenyl)sulfonyl)piperazin-1-yl)-1-(imidazo[1,2-a]pyridin-3-yl)ethan-1-one (10h) ( $^1\text{H}$  NMR,  $^{13}\text{C}$  NMR & HRMS Spectra).

**22: 1-(imidazo[1,2-a]pyridin-3-yl)-2-(4-((4-nitrophenyl)sulfonyl)piperazin-1-yl)ethan-1-one (10s) (<sup>1</sup>H NMR, <sup>13</sup>C NMR & HRMS Spectra)**

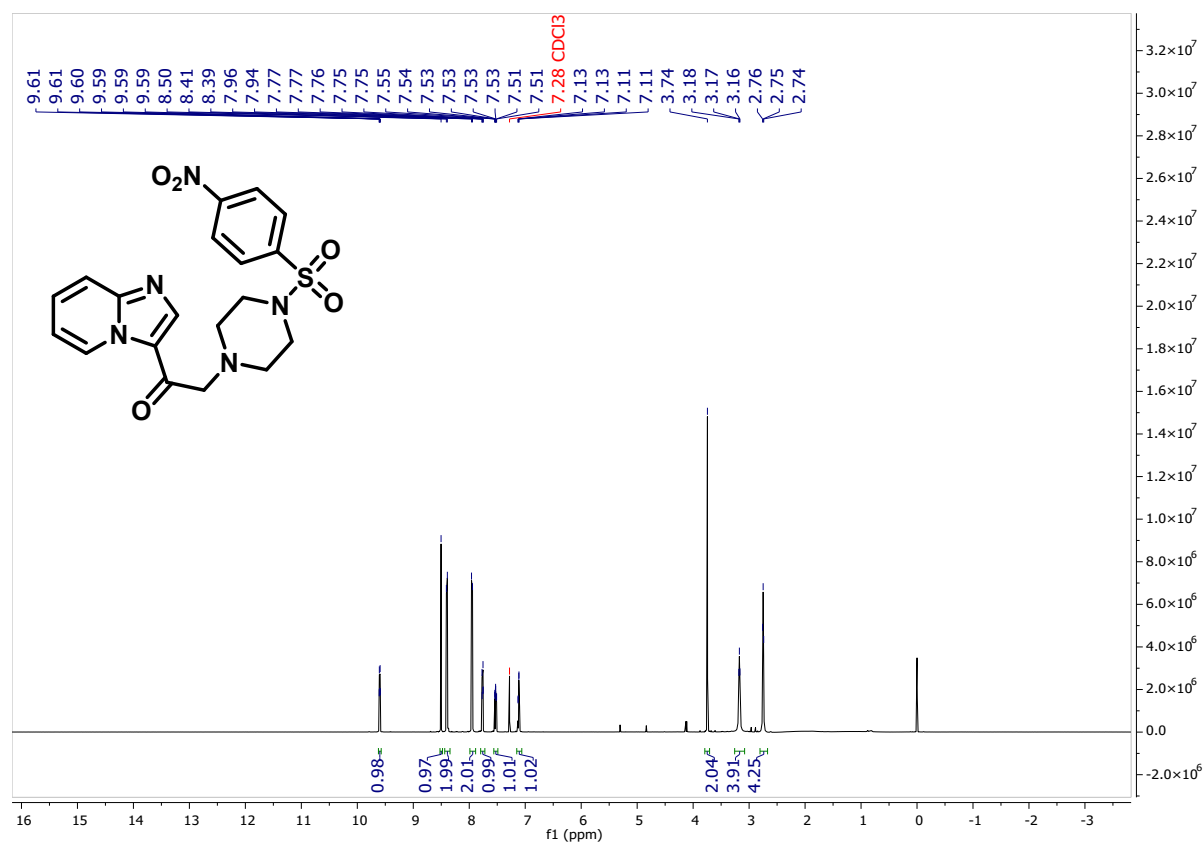

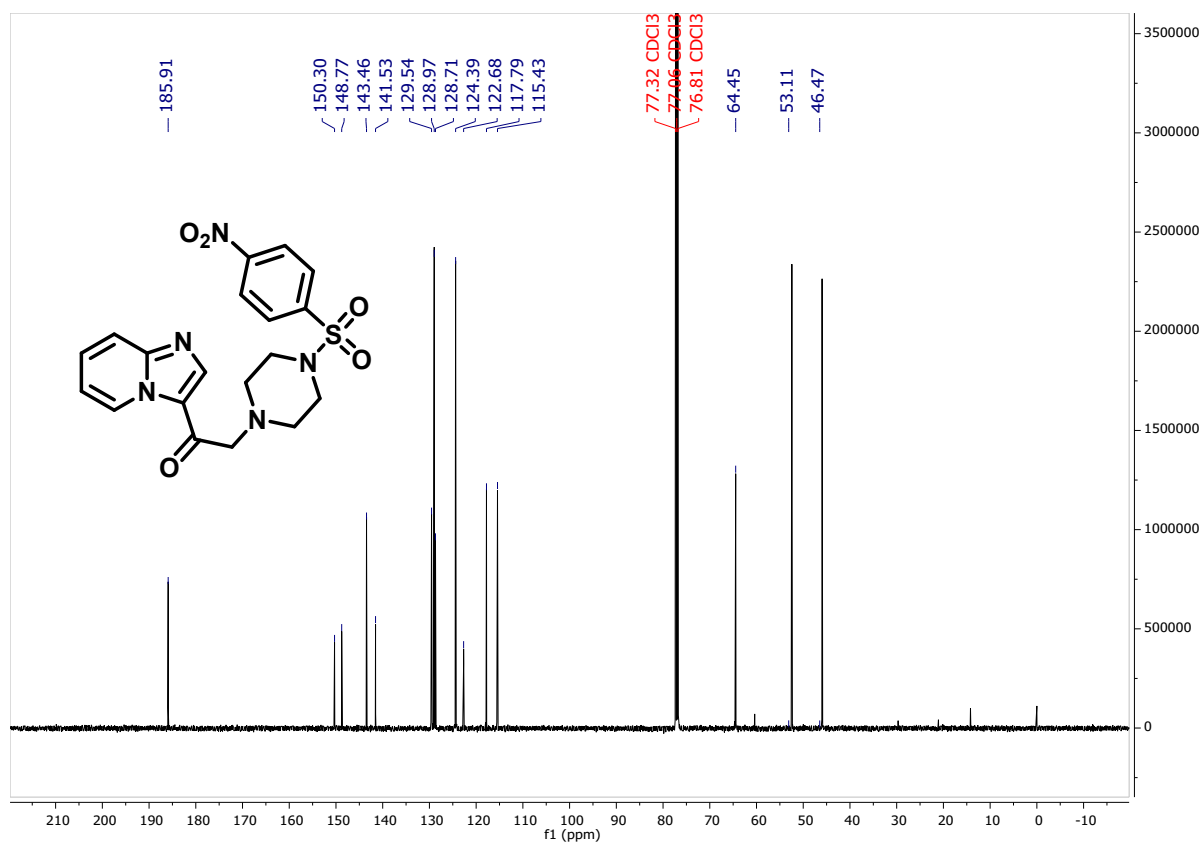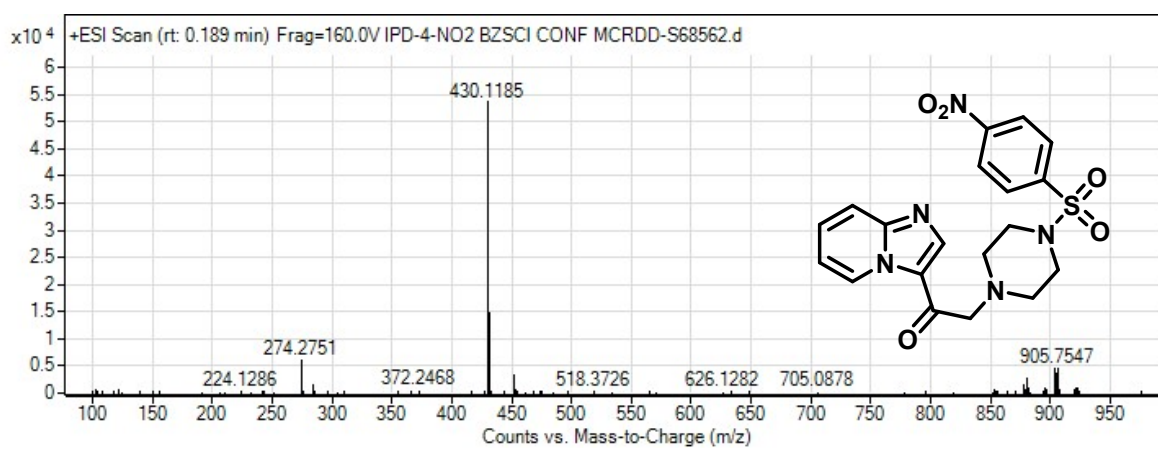

**FIGURE S22: 1-(imidazo[1,2-a]pyridin-3-yl)-2-(4-((4-nitrophenyl)sulfonyl)piperazin-1-yl)ethan-1-one (10s) (<sup>1</sup>H NMR, <sup>13</sup>C NMR & HRMS Spectra).**



**23: 2-((4-(2-(imidazo[1,2-a]pyridin-3-yl)-2-oxoethyl)piperazin-1-yl)sulfonyl)benzotrile (10o) (<sup>1</sup>H NMR, <sup>13</sup>C NMR & HRMS Spectra)**

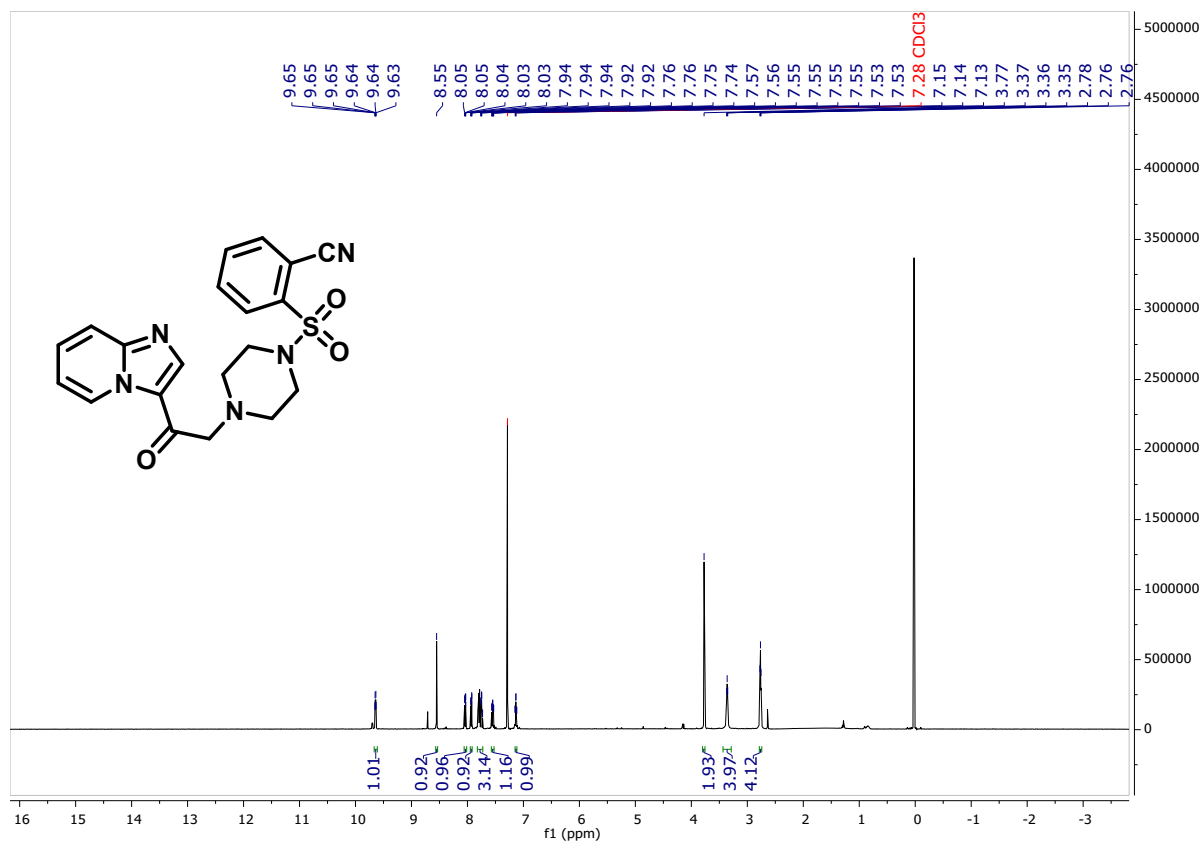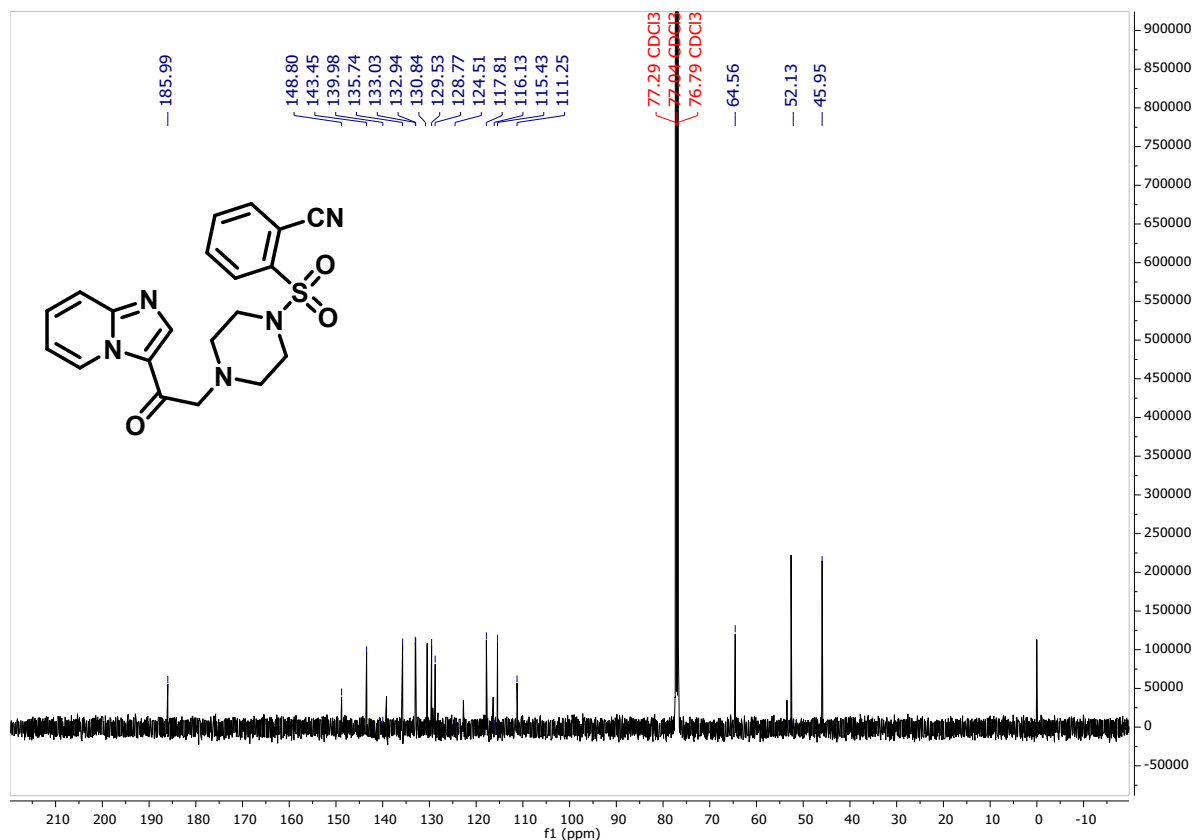

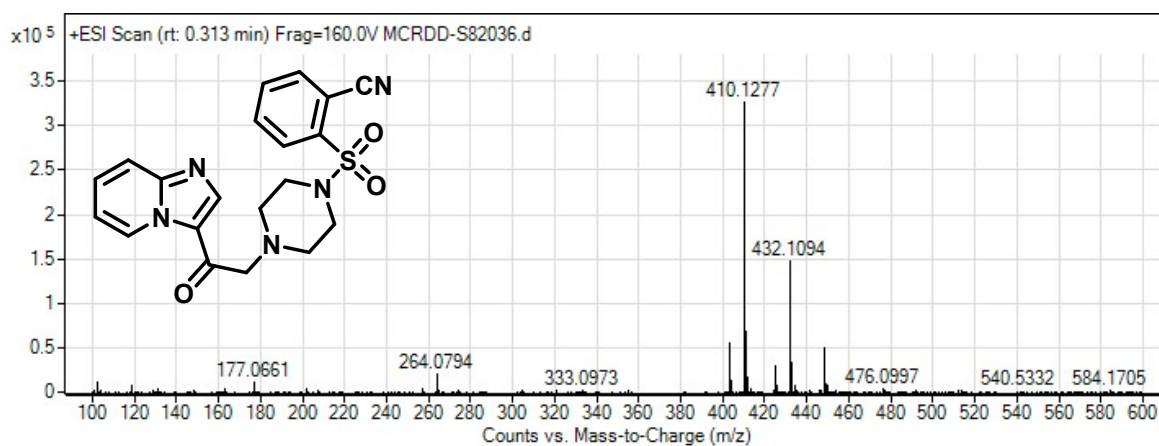

**FIGURE S23: 2-((4-(2-(imidazo[1,2-a]pyridin-3-yl)-2-oxoethyl)piperazin-1-yl)sulfonyl)benzotrile (10o) (<sup>1</sup>H NMR, <sup>13</sup>C NMR & HRMS Spectra).**

**24: 1-(imidazo[1,2-a]pyridin-3-yl)-2-(4-(thiophen-2-ylsulfonyl)piperazin-1-yl)ethan-1-one (10c) (<sup>1</sup>H NMR, <sup>13</sup>C NMR & HRMS Spectra)**

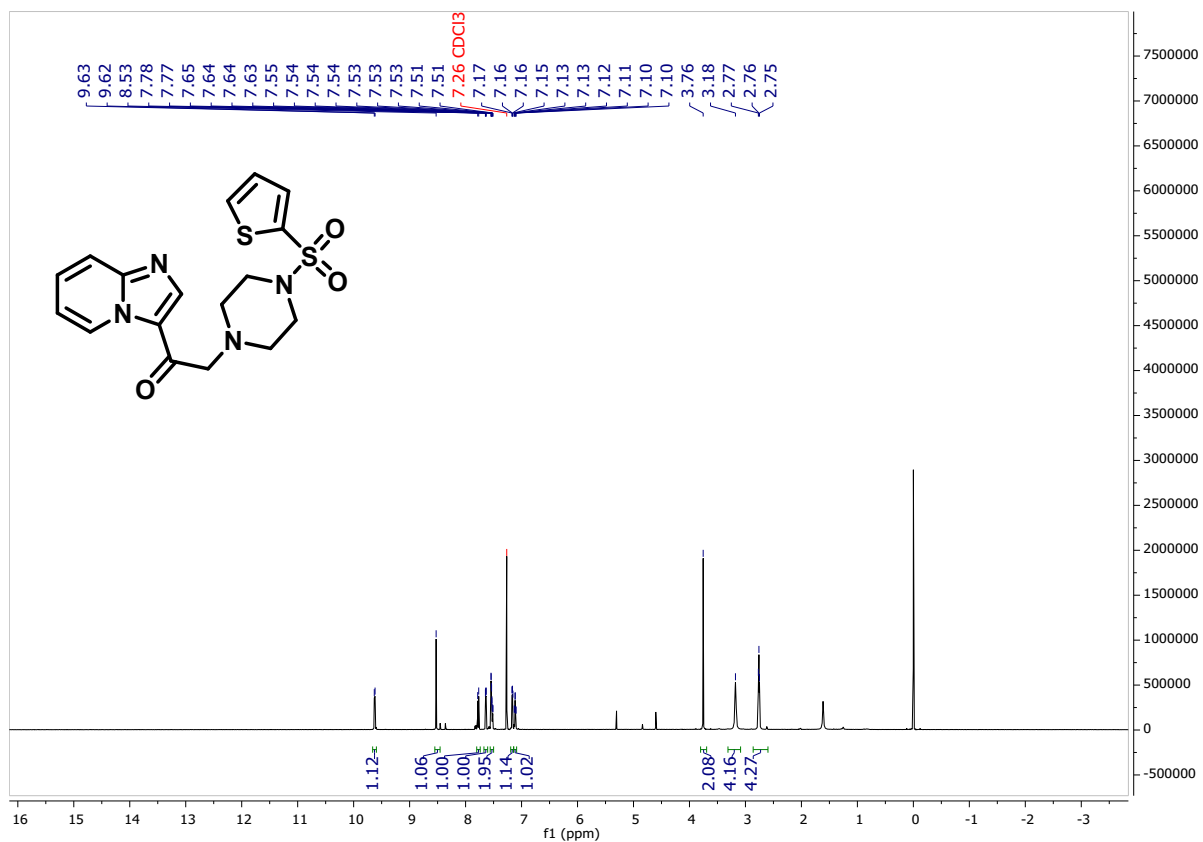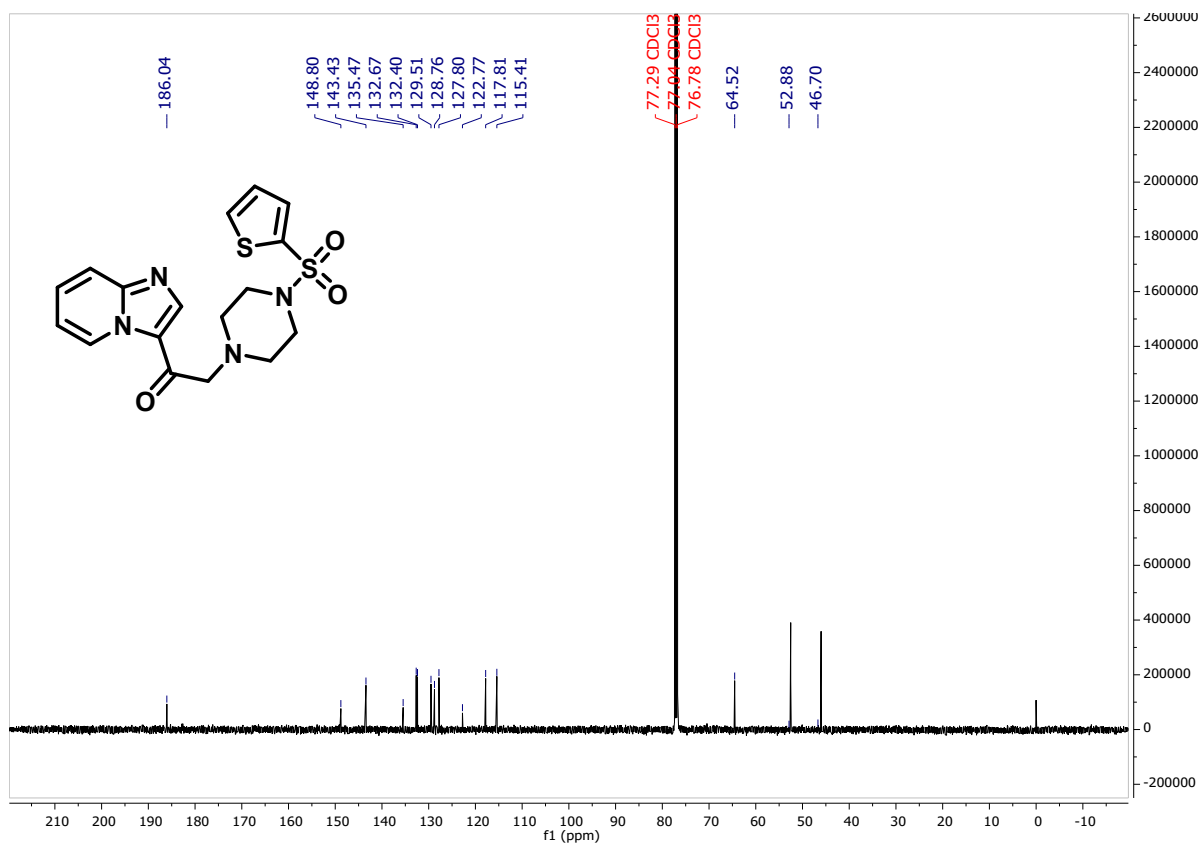

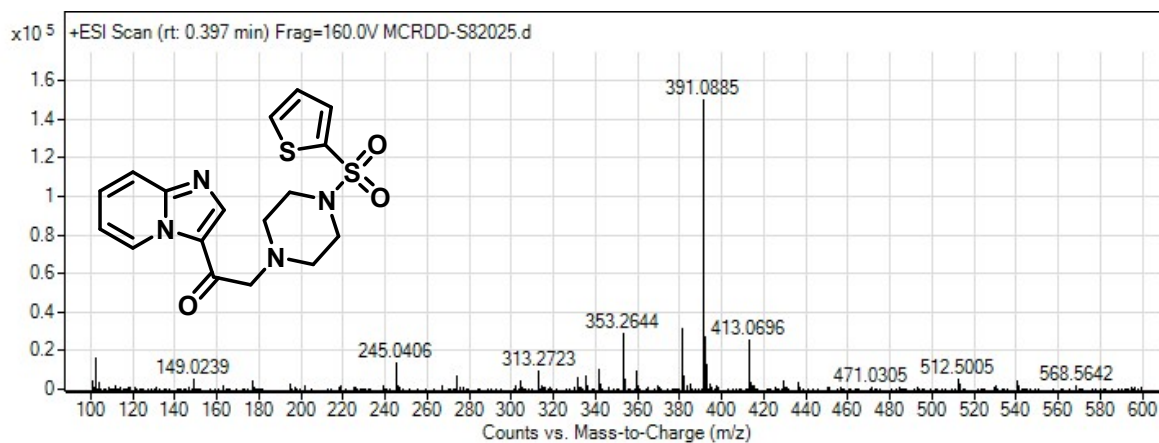

**FIGURE S24: 1-(imidazo[1,2-a]pyridin-3-yl)-2-(4-(thiophen-2-ylsulfonyl)piperazin-1-yl)ethan-1-one (10c) ( $^1\text{H}$  NMR,  $^{13}\text{C}$  NMR & HRMS Spectra).**

25: 2-(4-(cyclopropylsulfonyl)piperazin-1-yl)-1-(imidazo[1,2-a]pyridin-3-yl)ethan-1-one (**10n**) (<sup>1</sup>H NMR, <sup>13</sup>C NMR & HRMS Spectra)

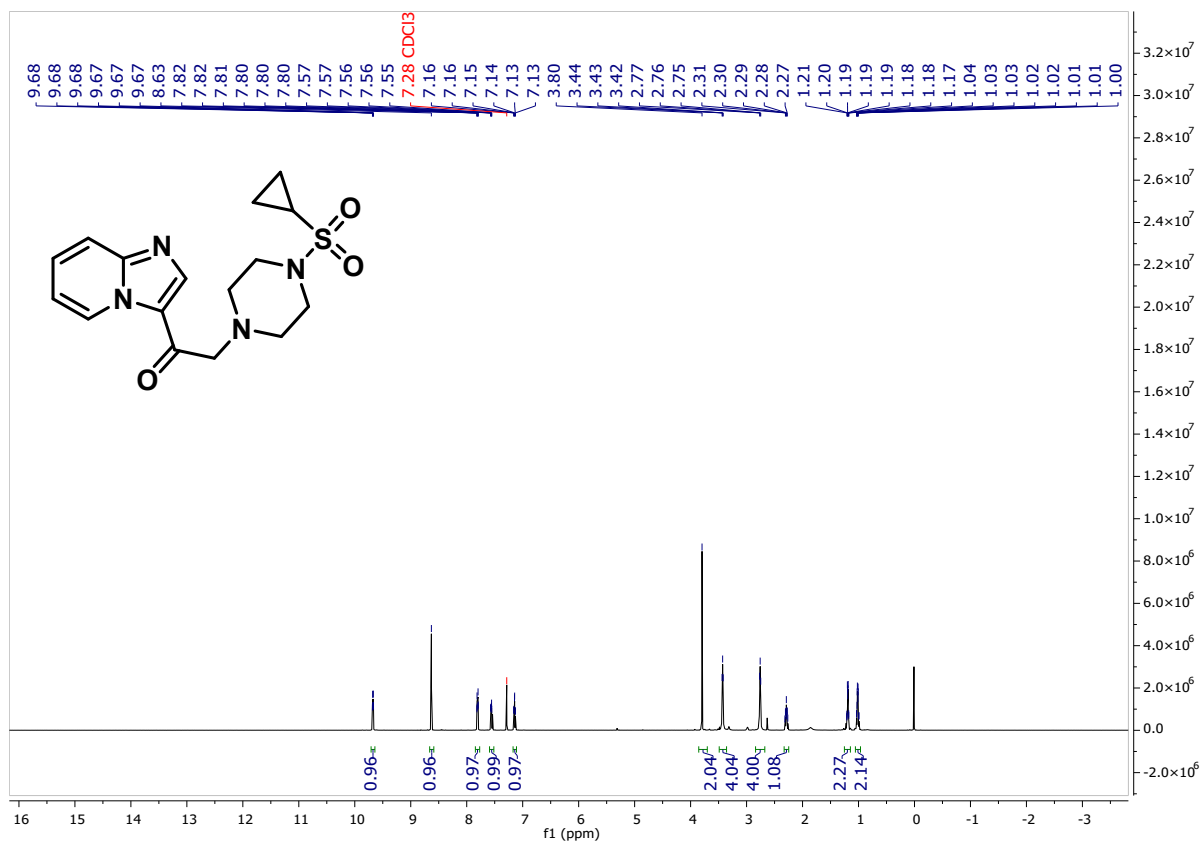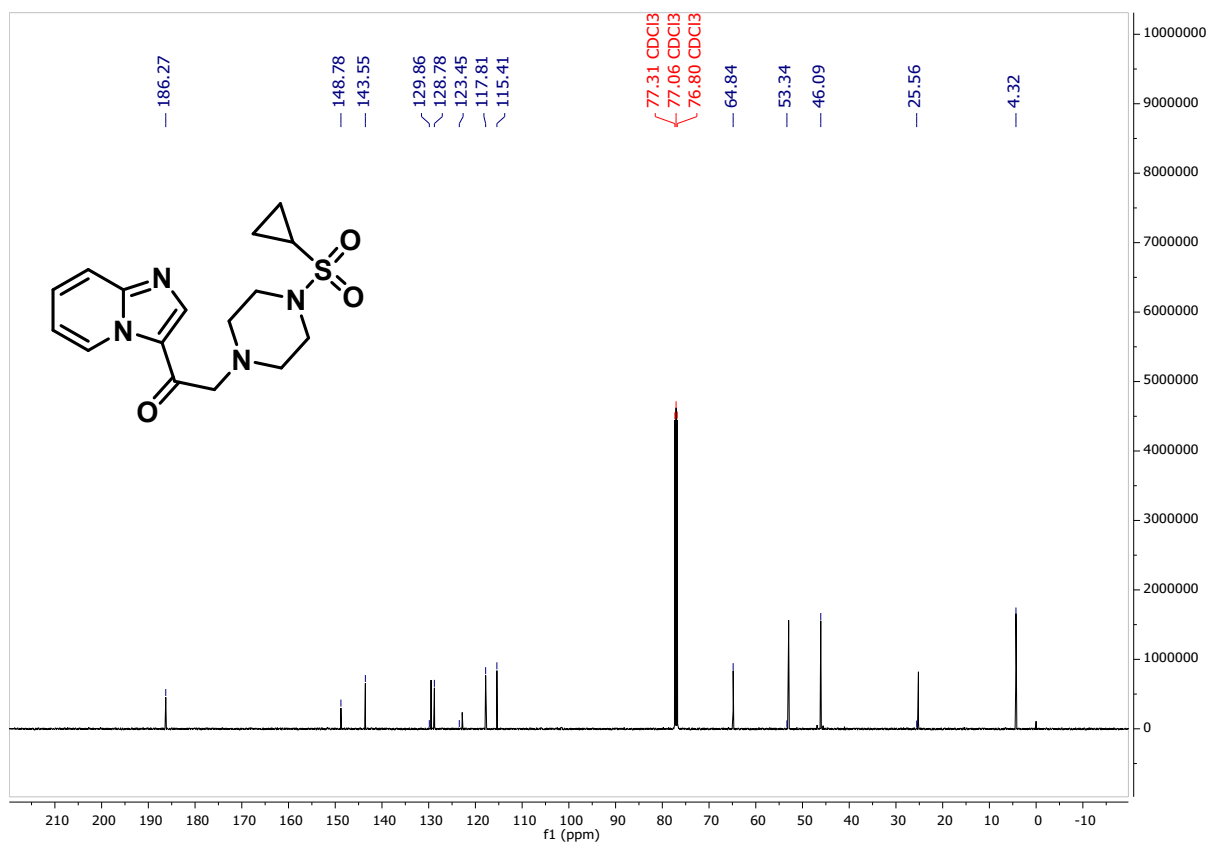



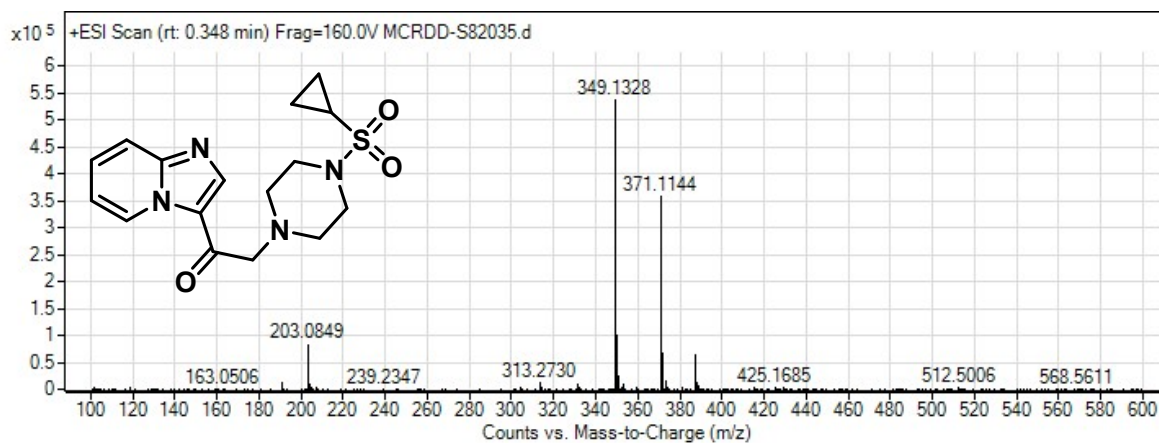

**FIGURE S25: 2-(4-(cyclopropylsulfonyl)piperazin-1-yl)-1-(imidazo[1,2-a]pyridin-3-yl)ethan-1-one (10n) (<sup>1</sup>H NMR, <sup>13</sup>C NMR & HRMS Spectra).**

26: 2-(4-((5-bromo-2-methoxyphenyl)sulfonyl)piperazin-1-yl)-1-(imidazo[1,2-a]XXXyridine-3-yl)ethan-1-one (10j) (<sup>1</sup>H NMR, <sup>13</sup>C NMR & HRMS Spectra)

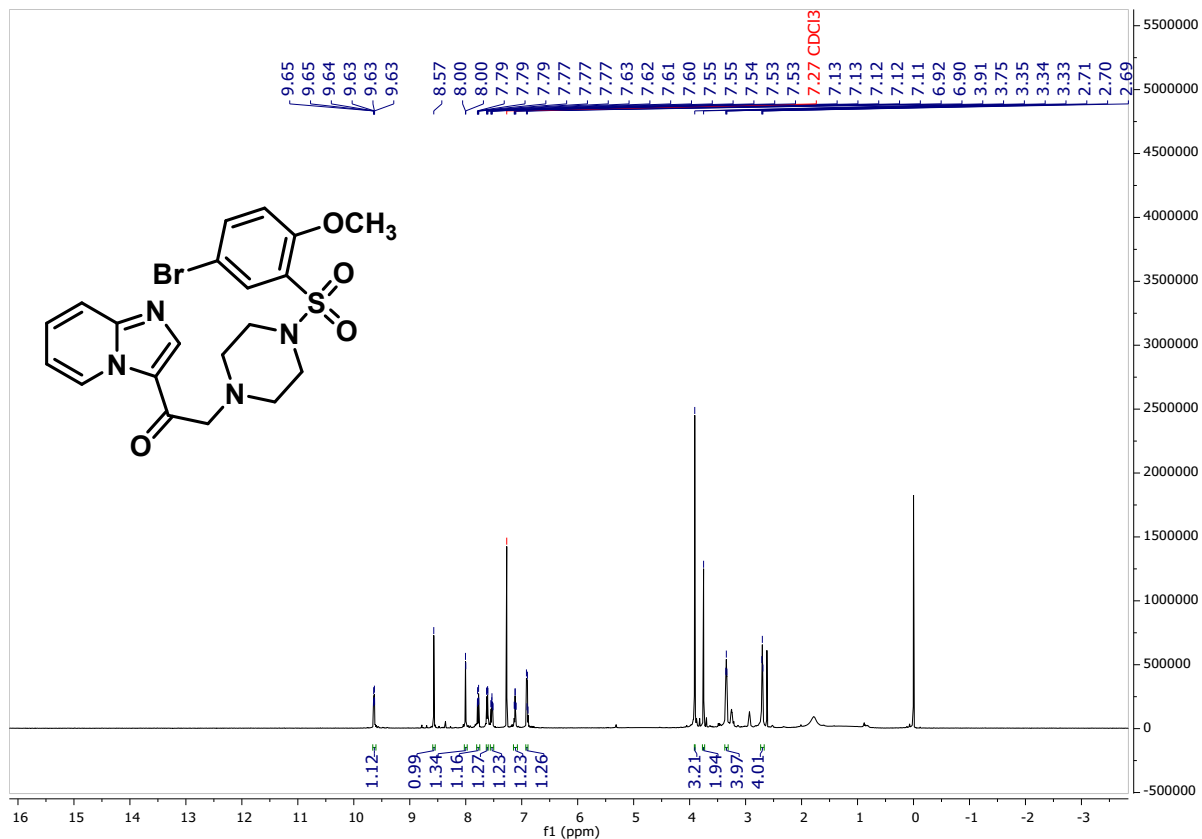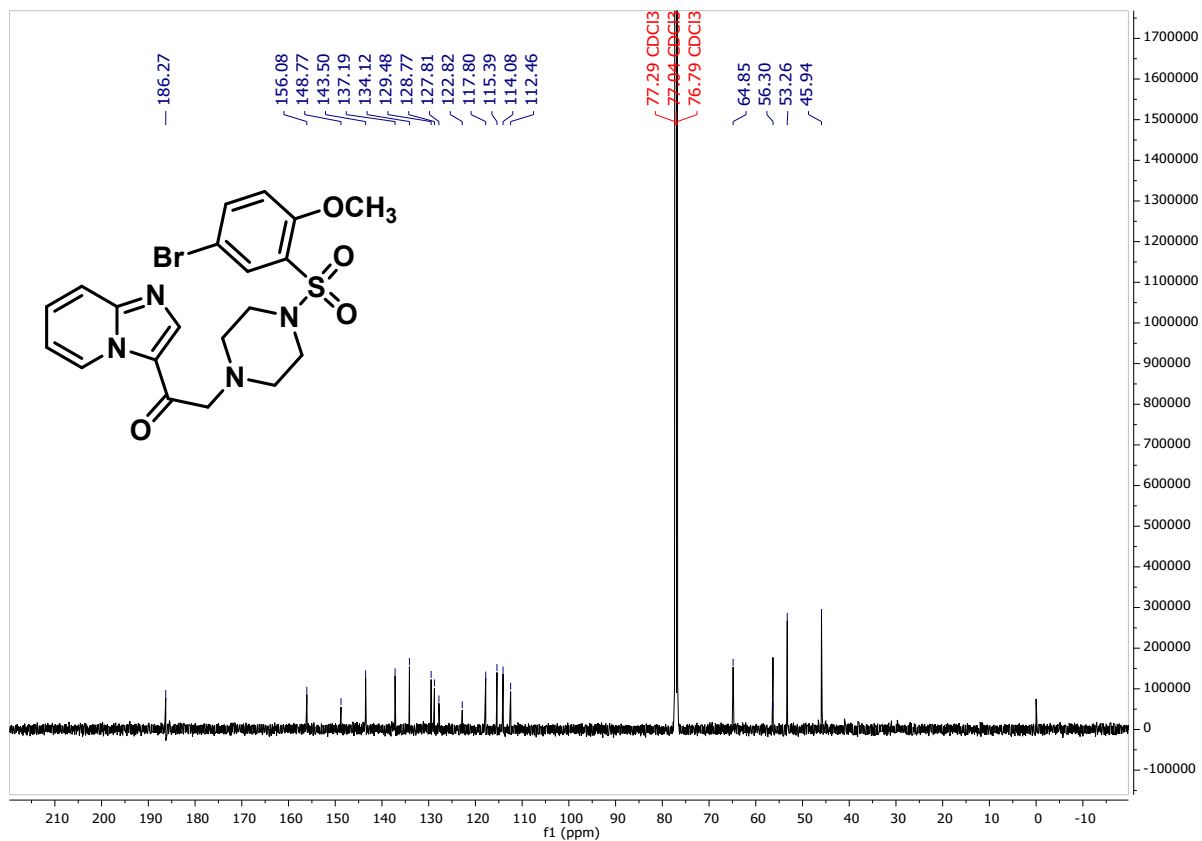





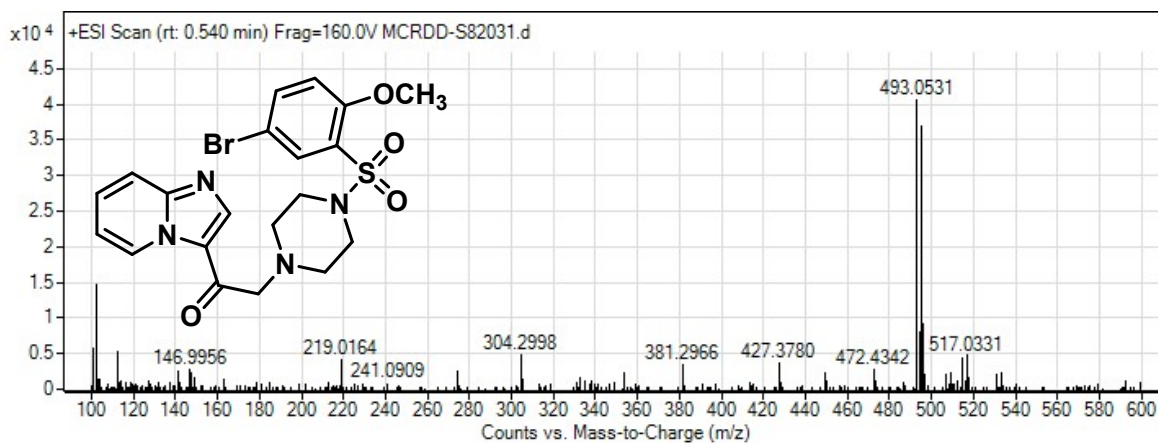

**FIGURE S26: 2-(4-((5-bromo-2-methoxyphenyl)sulfonyl)piperazin-1-yl)-1-(imidazo[1,2-a] yridine-3-yl)ethan-1-one (10j) (<sup>1</sup>H NMR, <sup>13</sup>C NMR & HRMS Spectra).**

27: 1-(imidazo[1,2-a]pyridin-3-yl)-2-(4-((4'-methoxy-[1,1'-biphenyl]-4-yl)sulfonyl)piperazin-1-yl)ethan-1-one (10r) (<sup>1</sup>H NMR, <sup>13</sup>C NMR & HRMS Spectra)

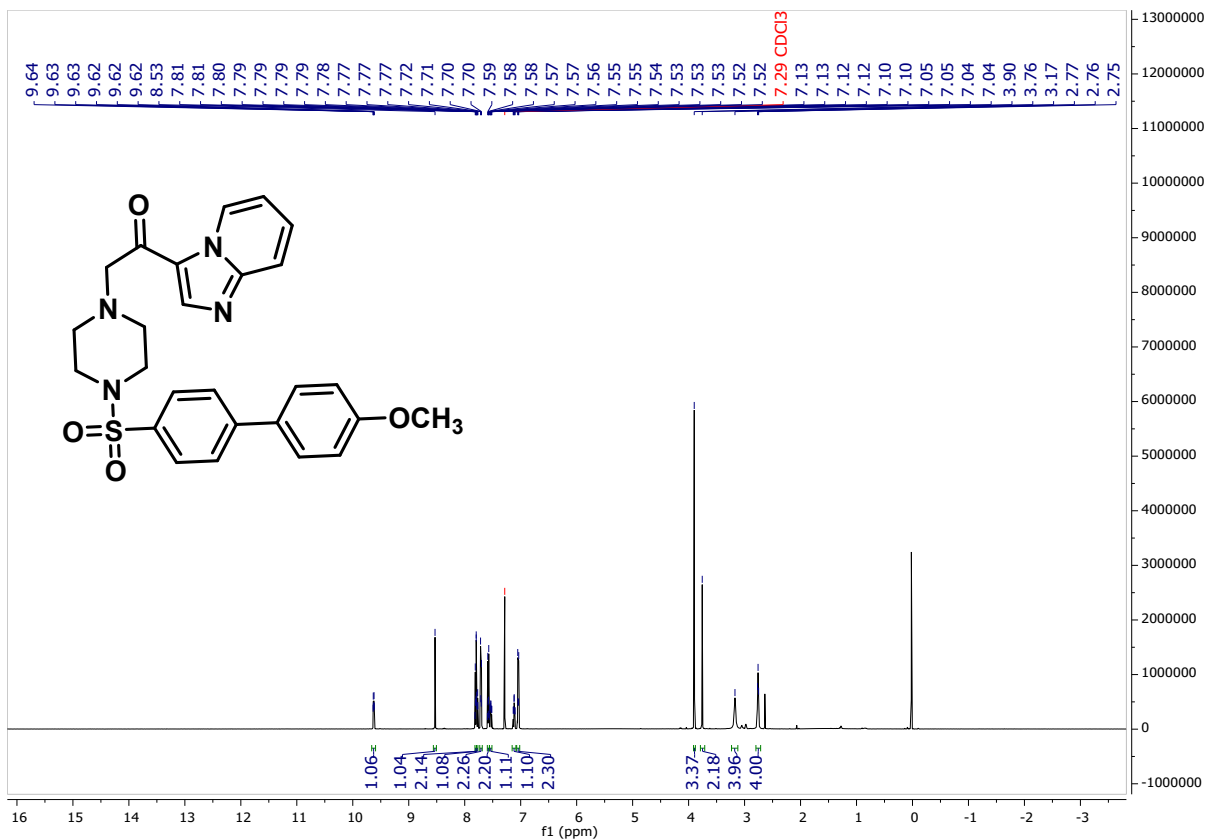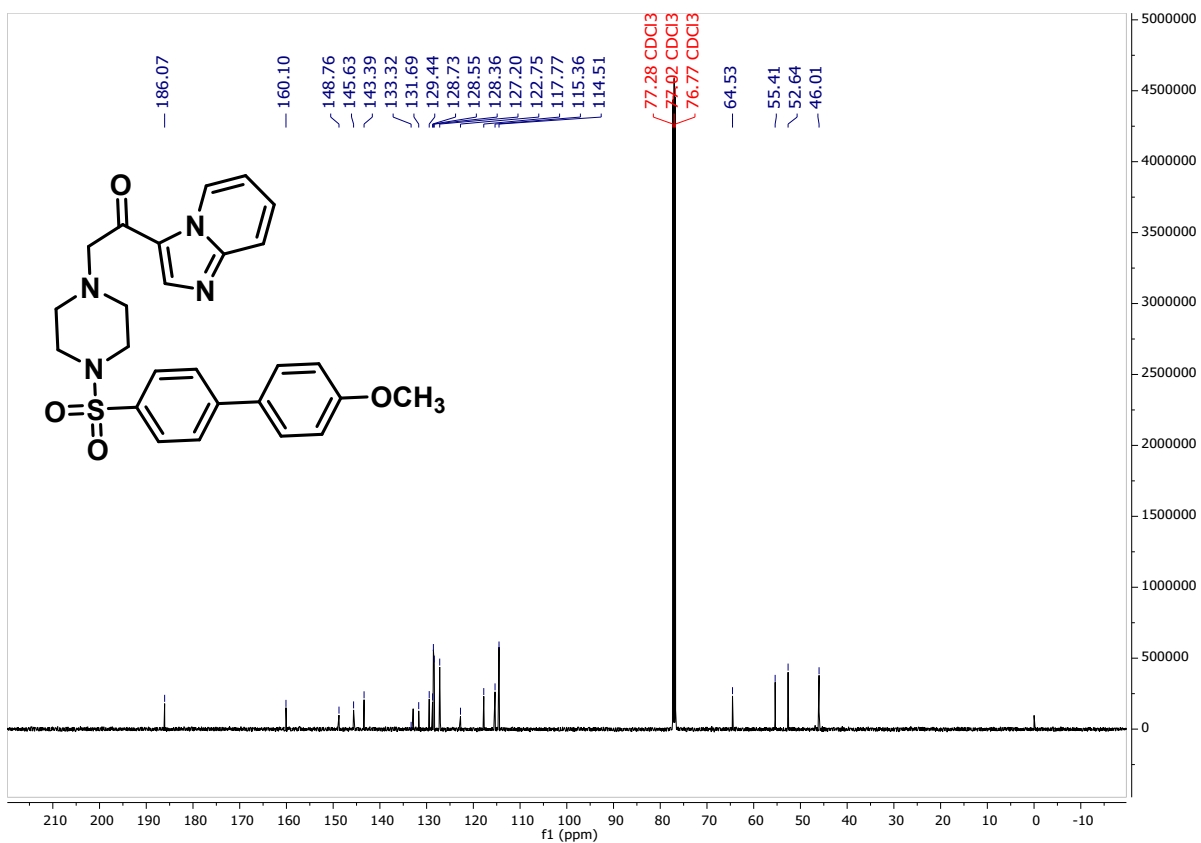

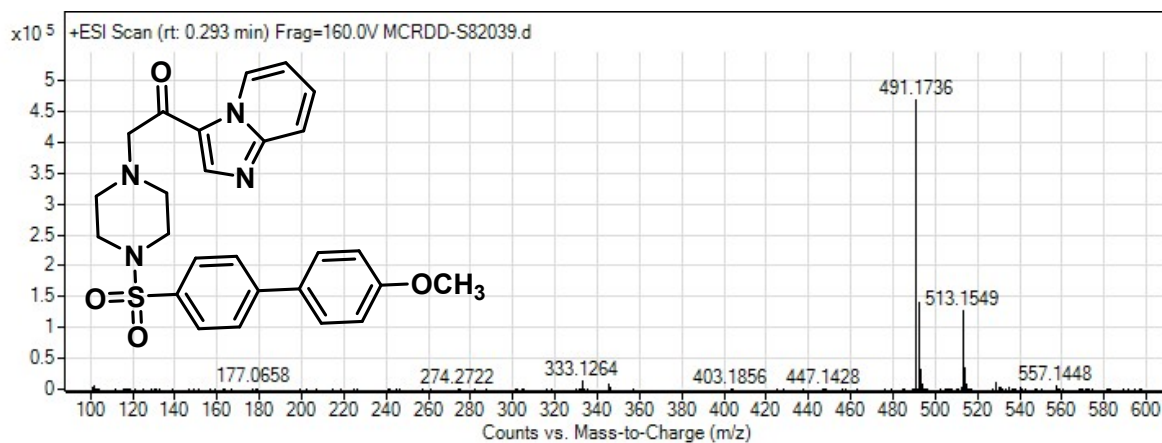

**FIGURE S27:** 1-(imidazo[1,2-a]pyridin-3-yl)-2-(4-((4'-methoxy-[1,1'-biphenyl]-4-yl)sulfonyl)piperazin-1-yl)ethan-1-one (10r) (<sup>1</sup>H NMR, <sup>13</sup>C NMR & HRMS Spectra).

**28: 1-(imidazo[1,2-a]pyridin-3-yl)-2-(4-((4-(trifluoromethyl)phenyl)sulfonyl)piperazin-1-yl)ethan-1-one (10d) (<sup>1</sup>H NMR, <sup>13</sup>C NMR, <sup>19</sup>F NMR & HRMS Spectra)**

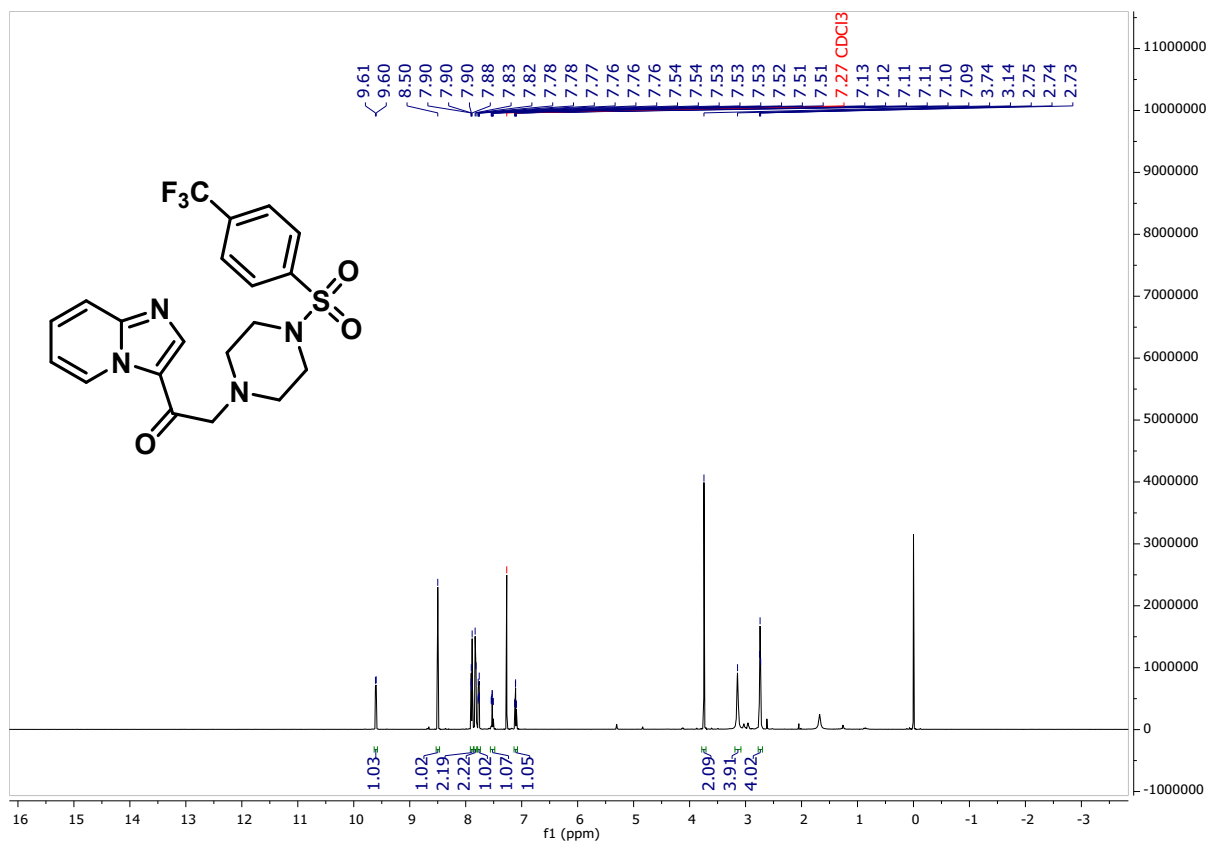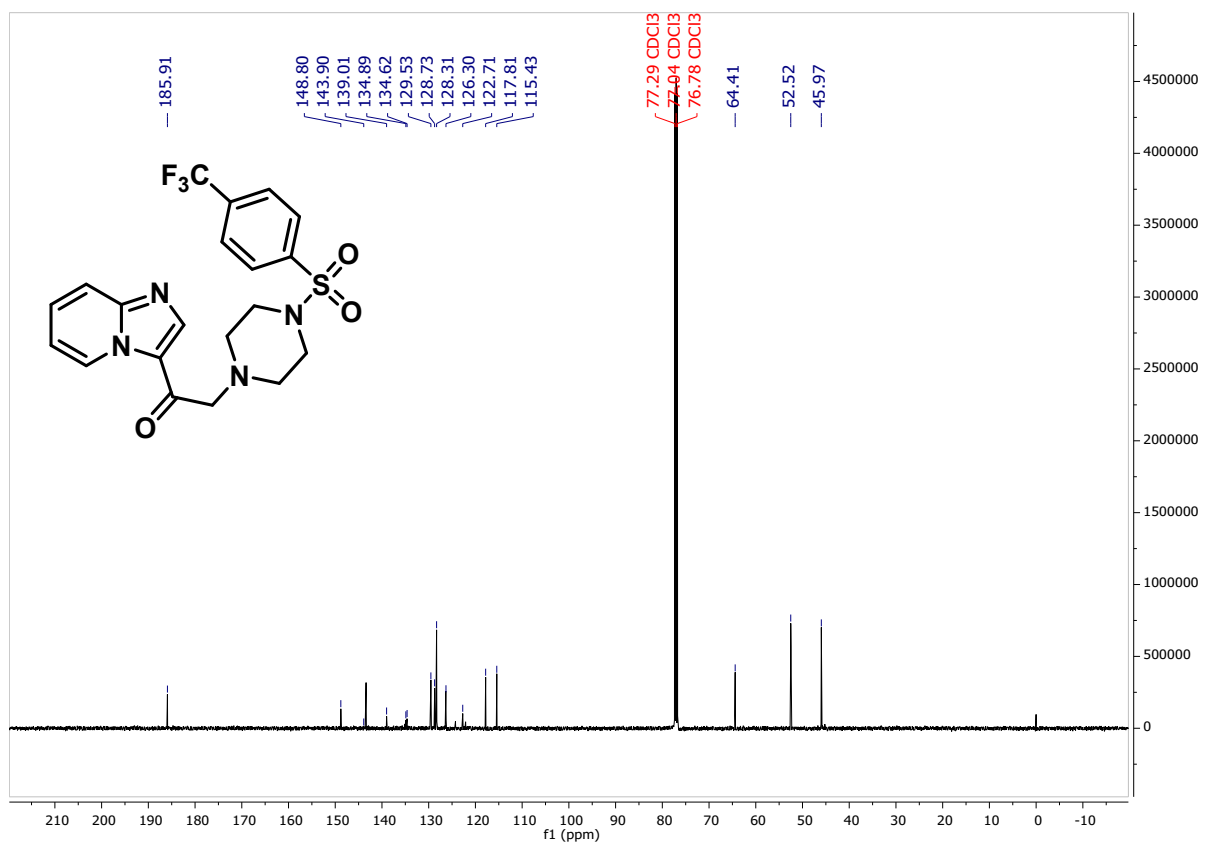

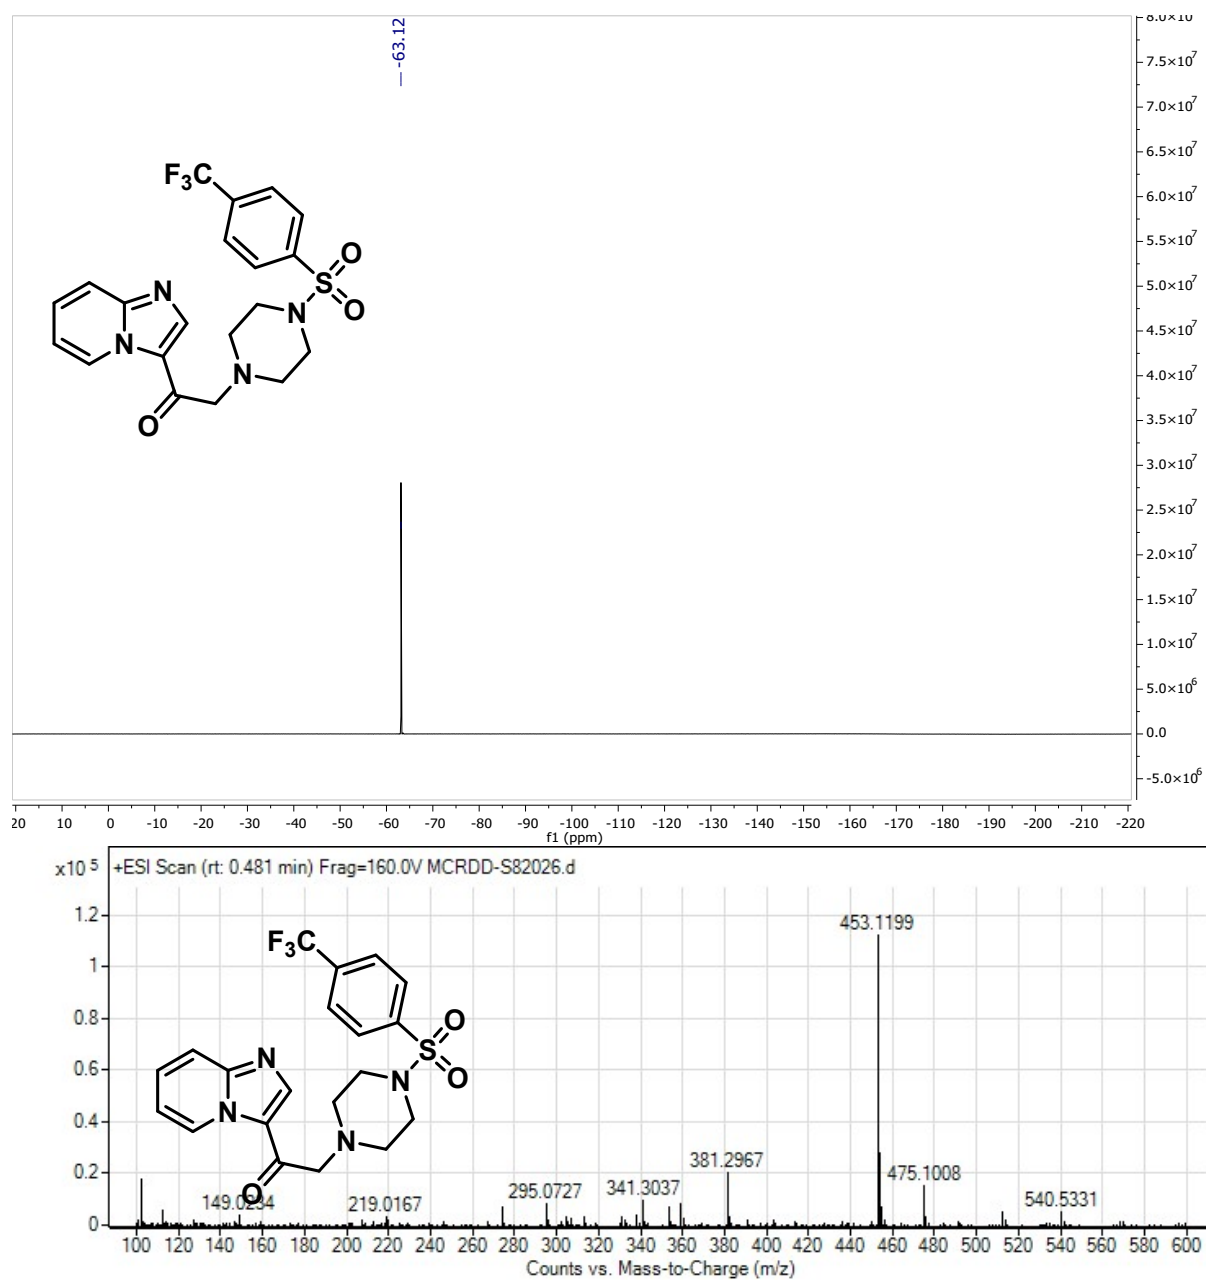

**FIGURE S28: 1-(imidazo[1,2-a]pyridin-3-yl)-2-(4-((trifluoromethyl)phenyl)sulfonyl)piperazin-1-yl)ethan-1-one (10d) (<sup>1</sup>H NMR, <sup>13</sup>C NMR, <sup>19</sup>F NMR & HRMS Spectra).**

**29: 1-(imidazo[1,2-a]pyridin-3-yl)-2-(4-(mesitylsulfonyl)piperazin-1-yl)ethan-1-one (10i) (<sup>1</sup>H NMR, <sup>13</sup>C NMR & HRMS Spectra)**

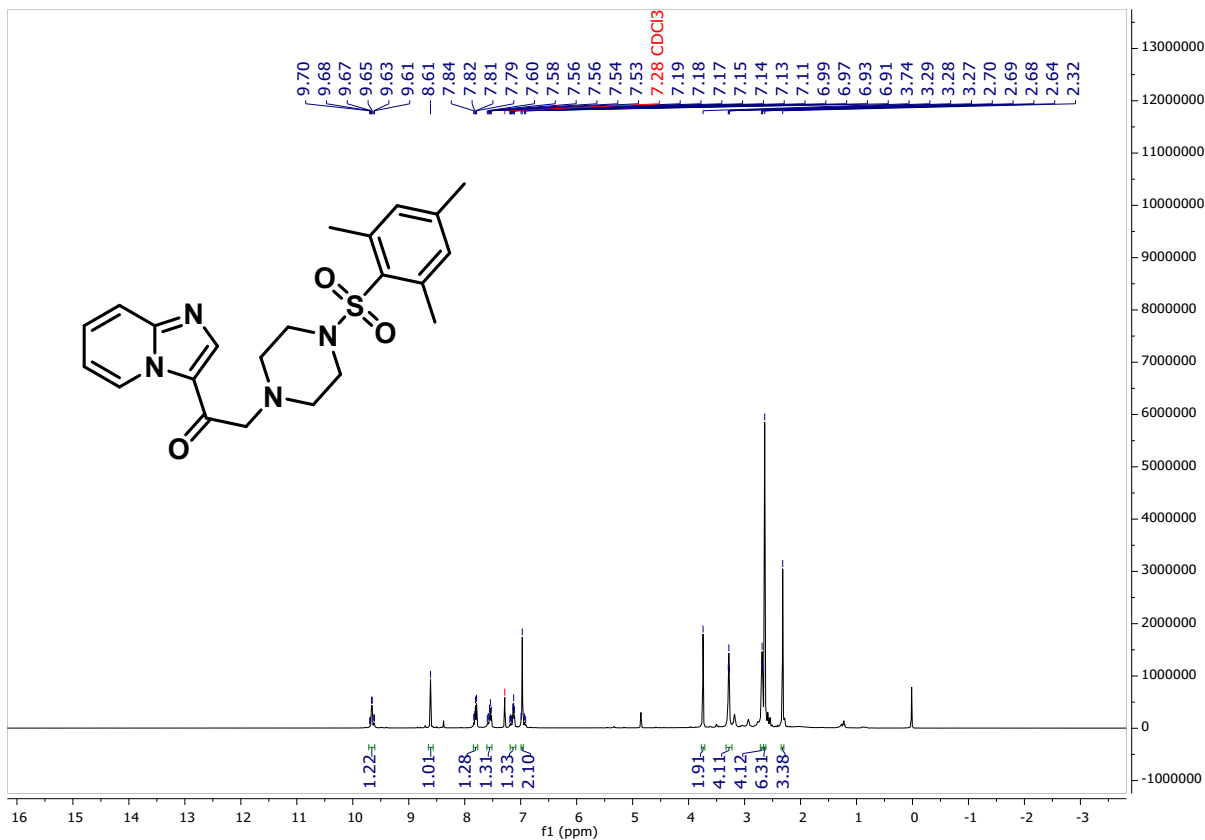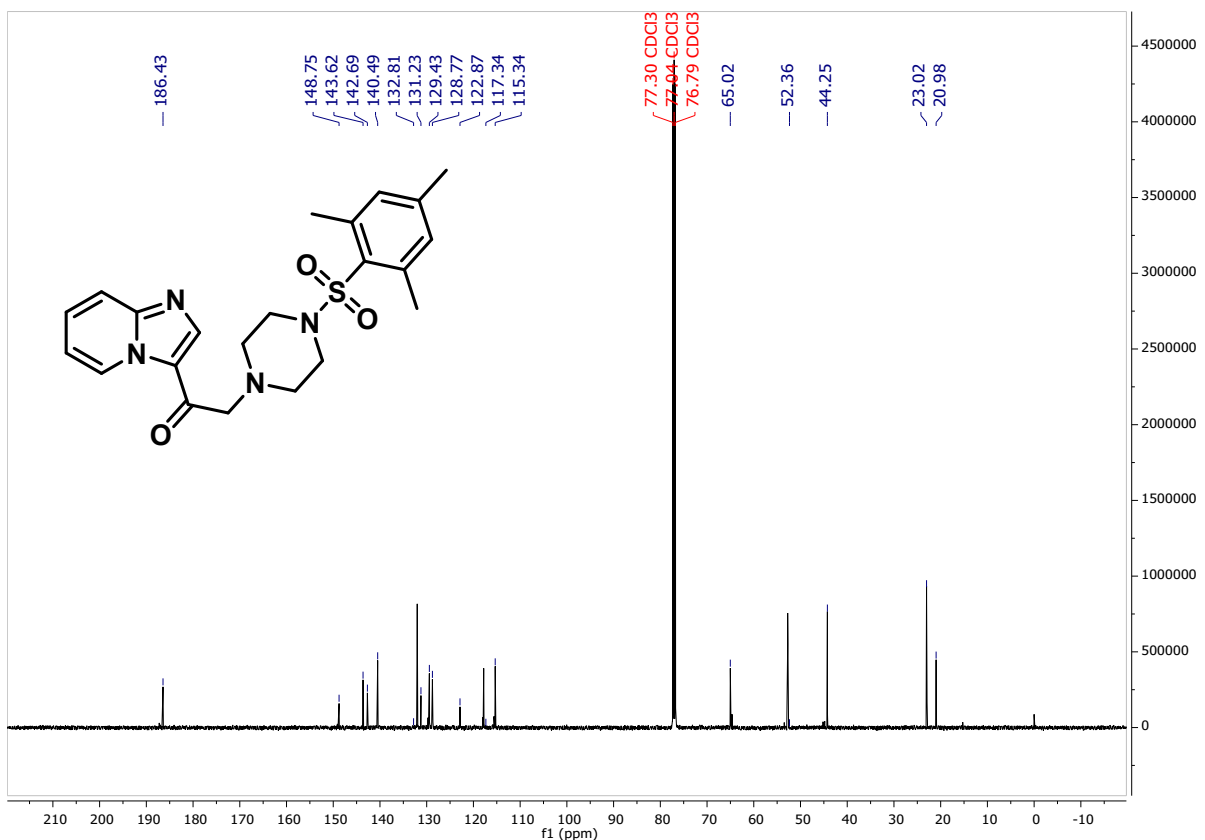

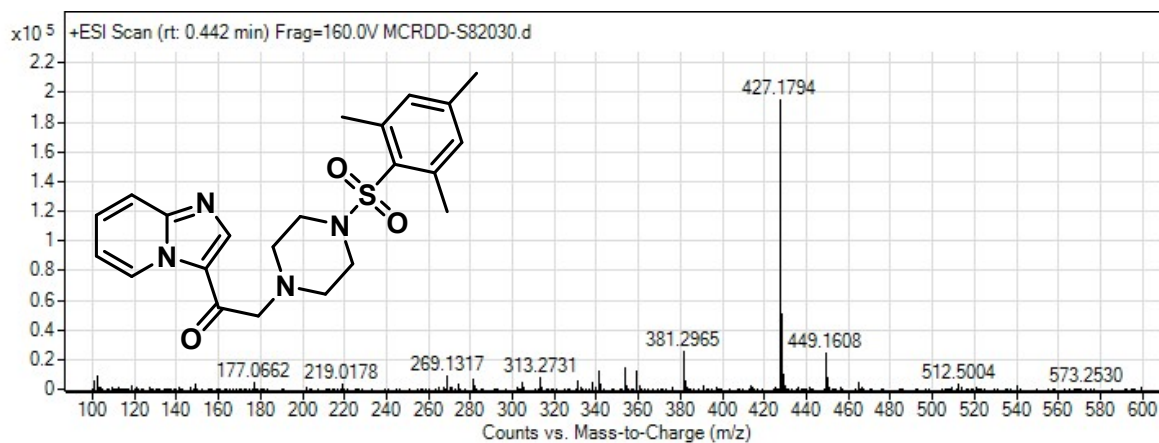

**FIGURE S29: 1-(imidazo[1,2-a]pyridin-3-yl)-2-(4-(mesitylsulfonyl)piperazin-1-yl)ethan-1-one (10i)**  
(<sup>1</sup>H NMR, <sup>13</sup>C NMR & HRMS Spectra).



30: 2-(4-(4-bromophenyl)sulfonyl)piperazin-1-yl)-1-(imidazo[1,2-a]pyridin-3-yl)ethan-1-one (10e)

(<sup>1</sup>H NMR, <sup>13</sup>C NMR & HRMS Spectra)

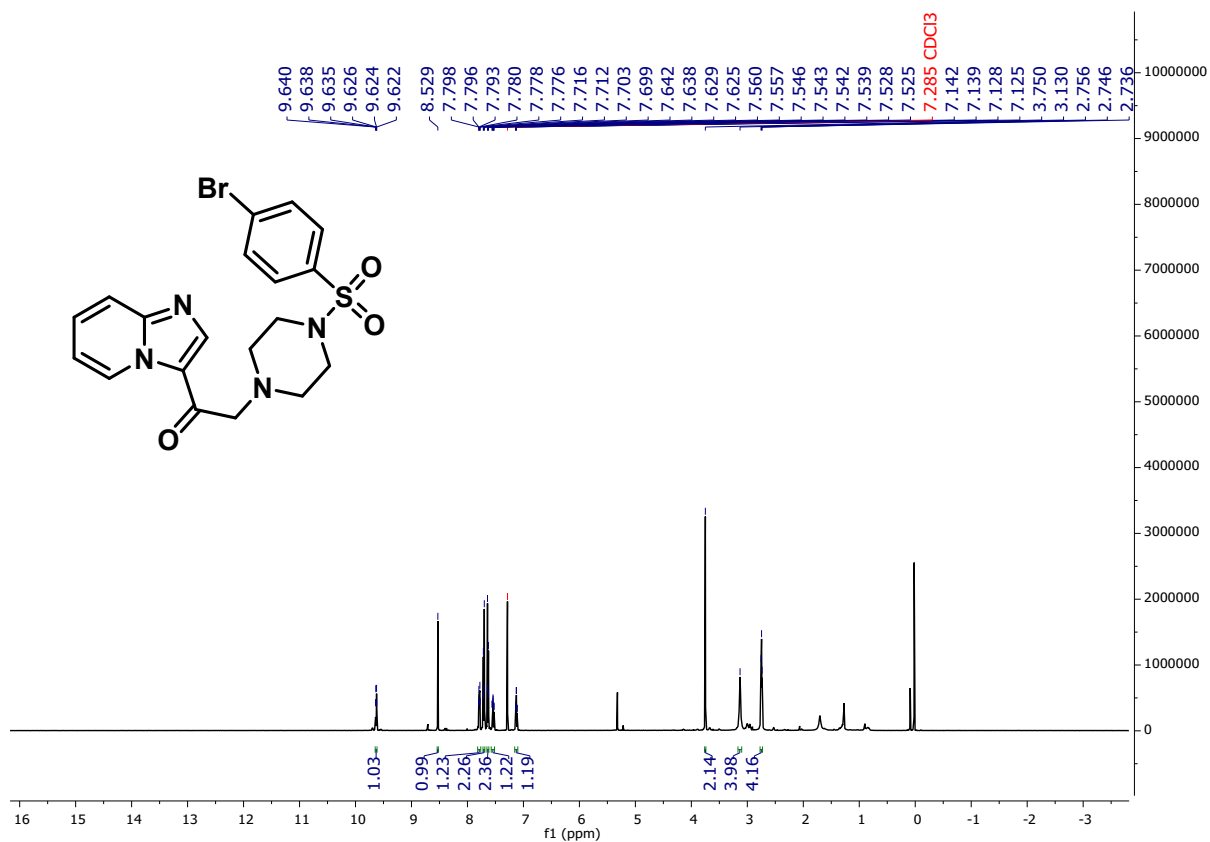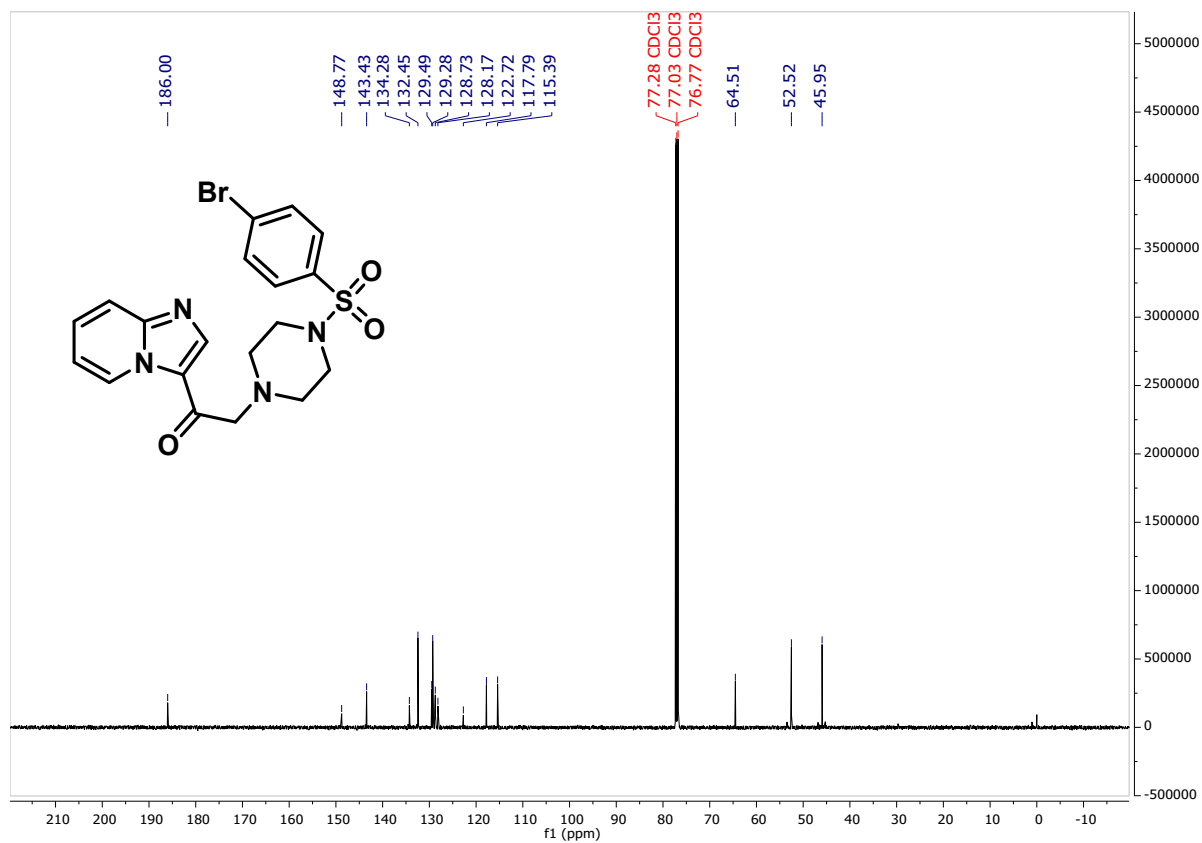

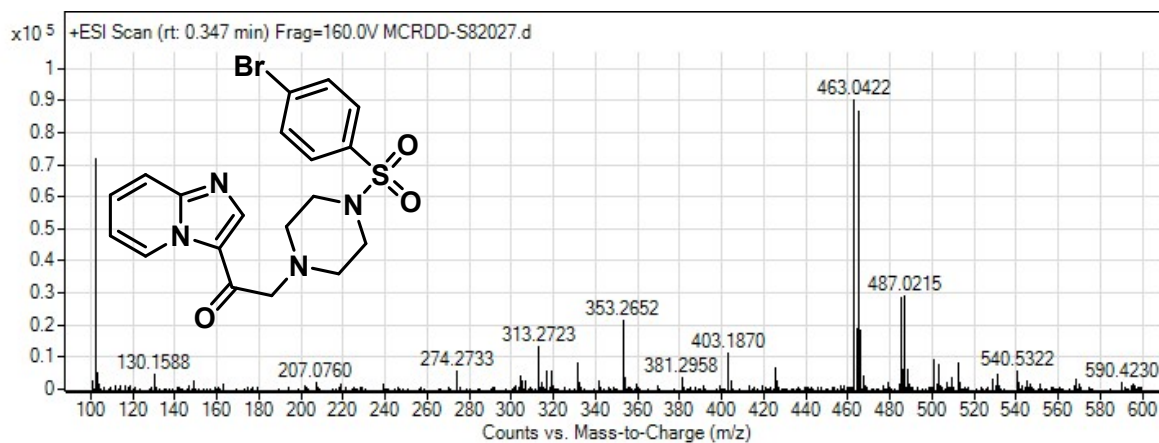

**FIGURE S30: 2-(4-((4-bromophenyl)sulfonyl)piperazin-1-yl)-1-(imidazo[1,2-a]pyridin-3-yl)ethan-1-one (10e) (<sup>1</sup>H NMR, <sup>13</sup>C NMR & HRMS Spectra).**

**31: 2-(4-(4-fluorophenyl)sulfonyl)piperazin-1-yl)-1-(imidazo[1,2-a]pyridin-3-yl)ethan-1-one (10f)**  
 (<sup>1</sup>H NMR, <sup>13</sup>C NMR, <sup>19</sup>F NMR & HRMS Spectra)

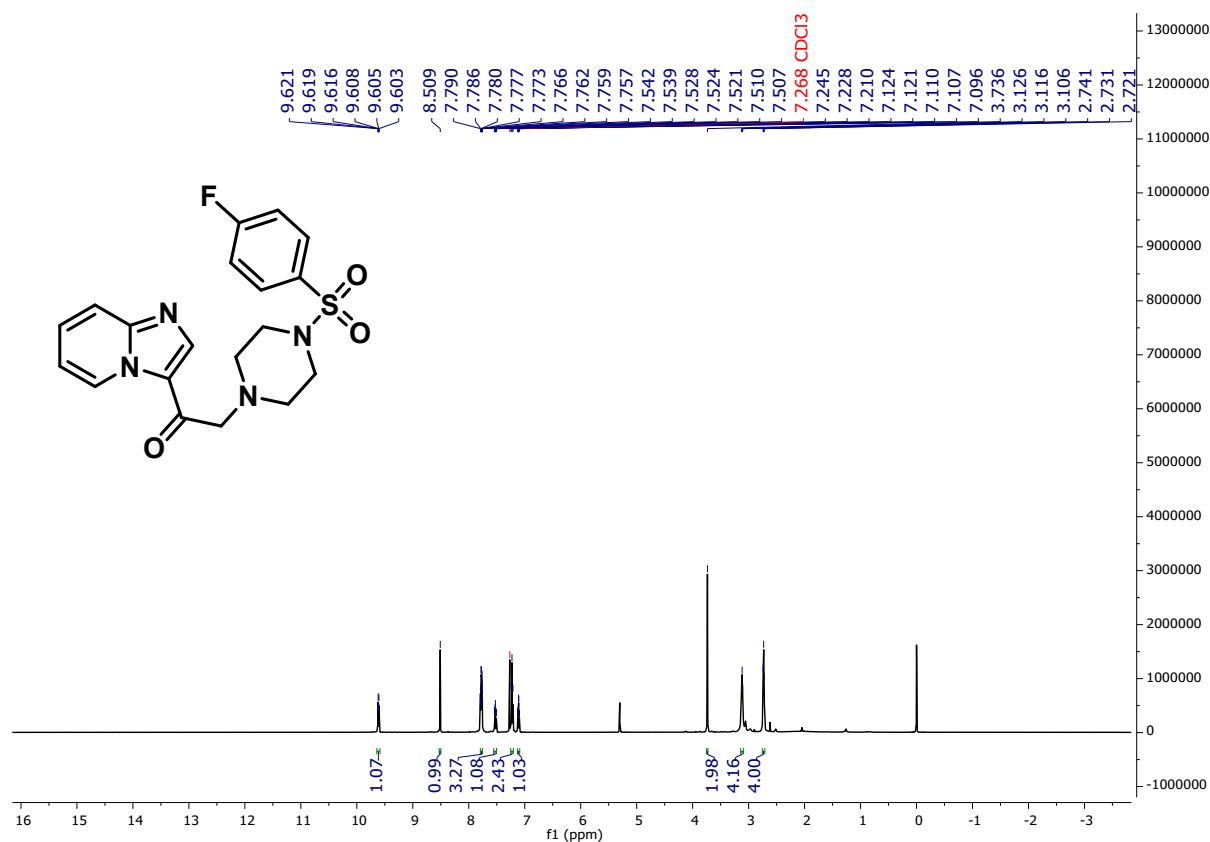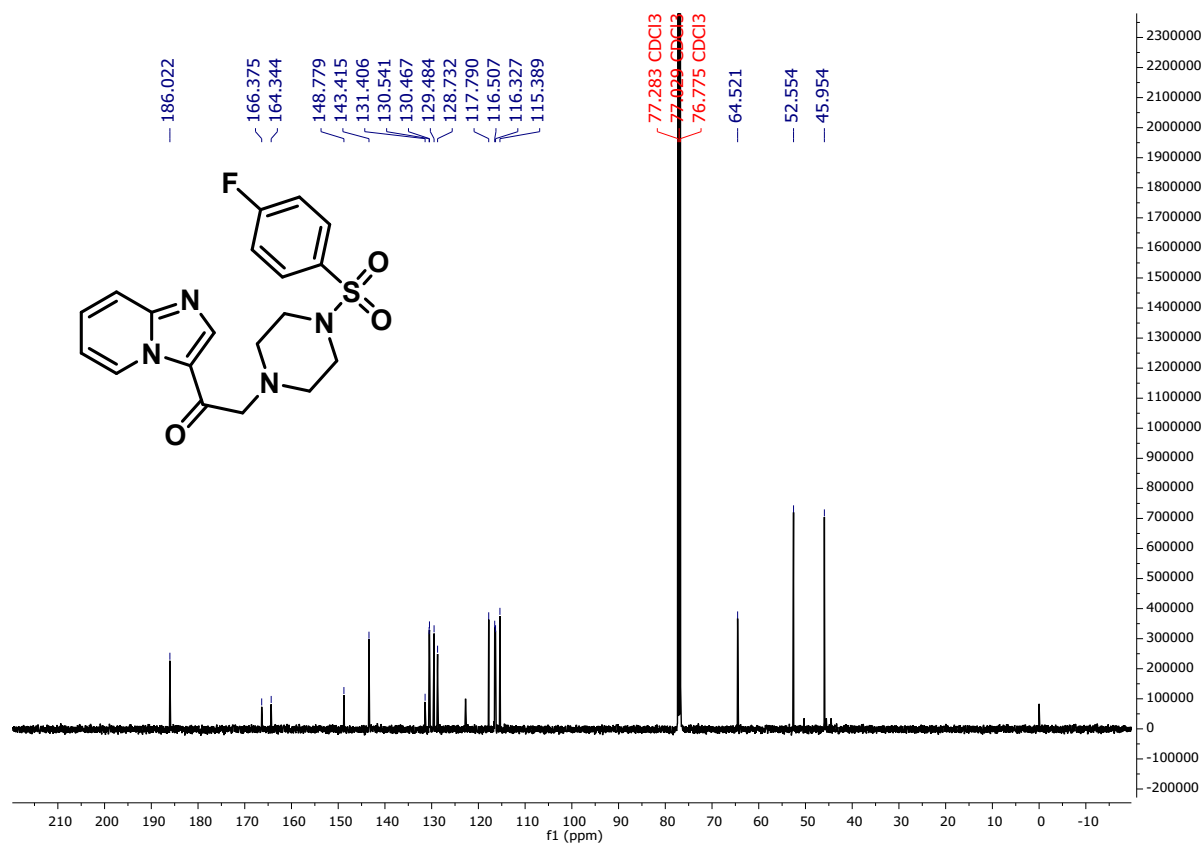

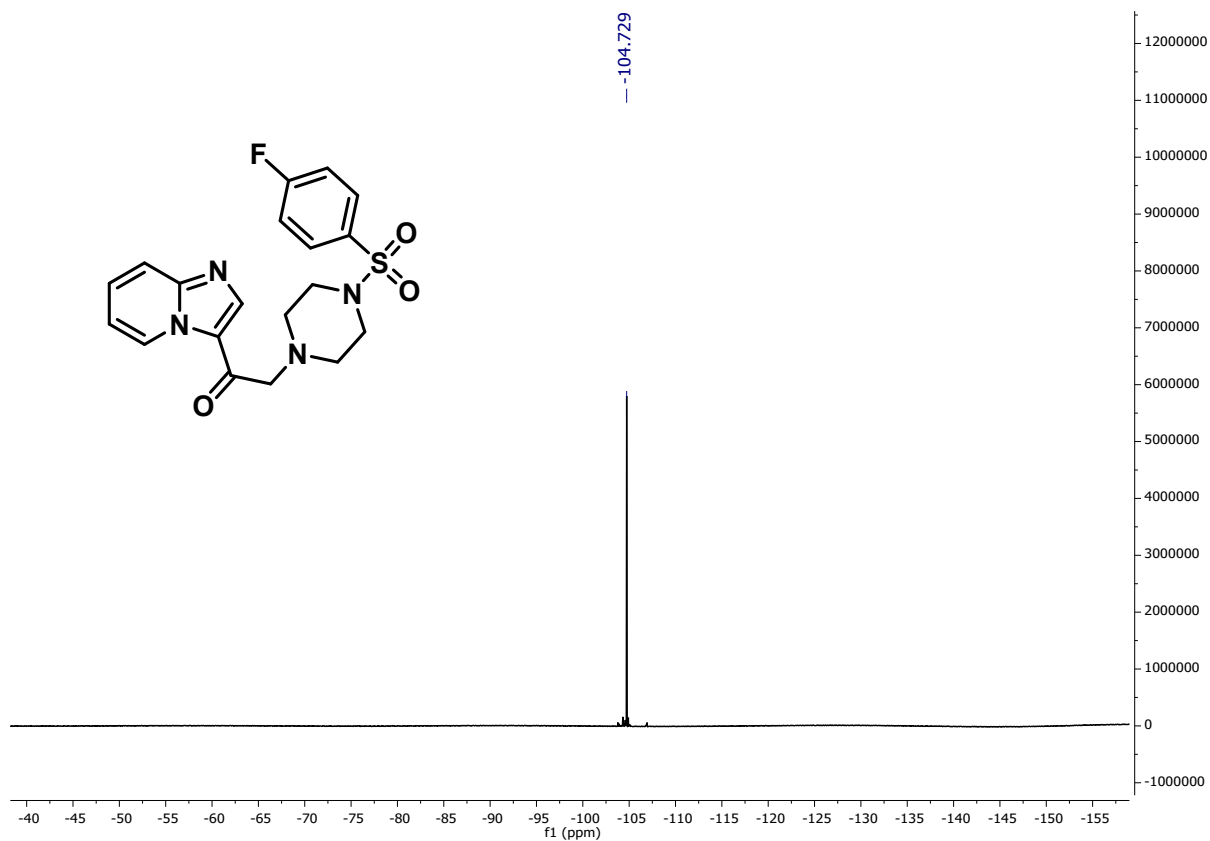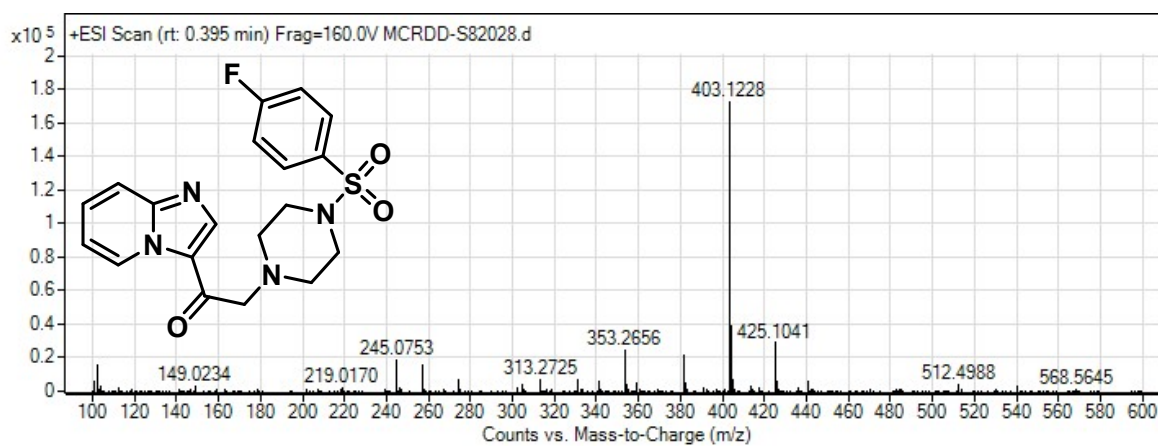

**FIGURE S31: 2-(4-((4-fluorophenyl)sulfonyl)piperazin-1-yl)-1-(imidazo[1,2-a]pyridin-3-yl)ethan-1-one (10f) (<sup>1</sup>H NMR, <sup>13</sup>C NMR, <sup>19</sup>F NMR & HRMS Spectra).**

32: 2-(4-(3-bromophenyl)sulfonyl)piperazin-1-yl)-1-(imidazo[1,2-a]pyridin-3-yl)ethan-1-one (10k)

(<sup>1</sup>H NMR, <sup>13</sup>C NMR & HRMS Spectra)

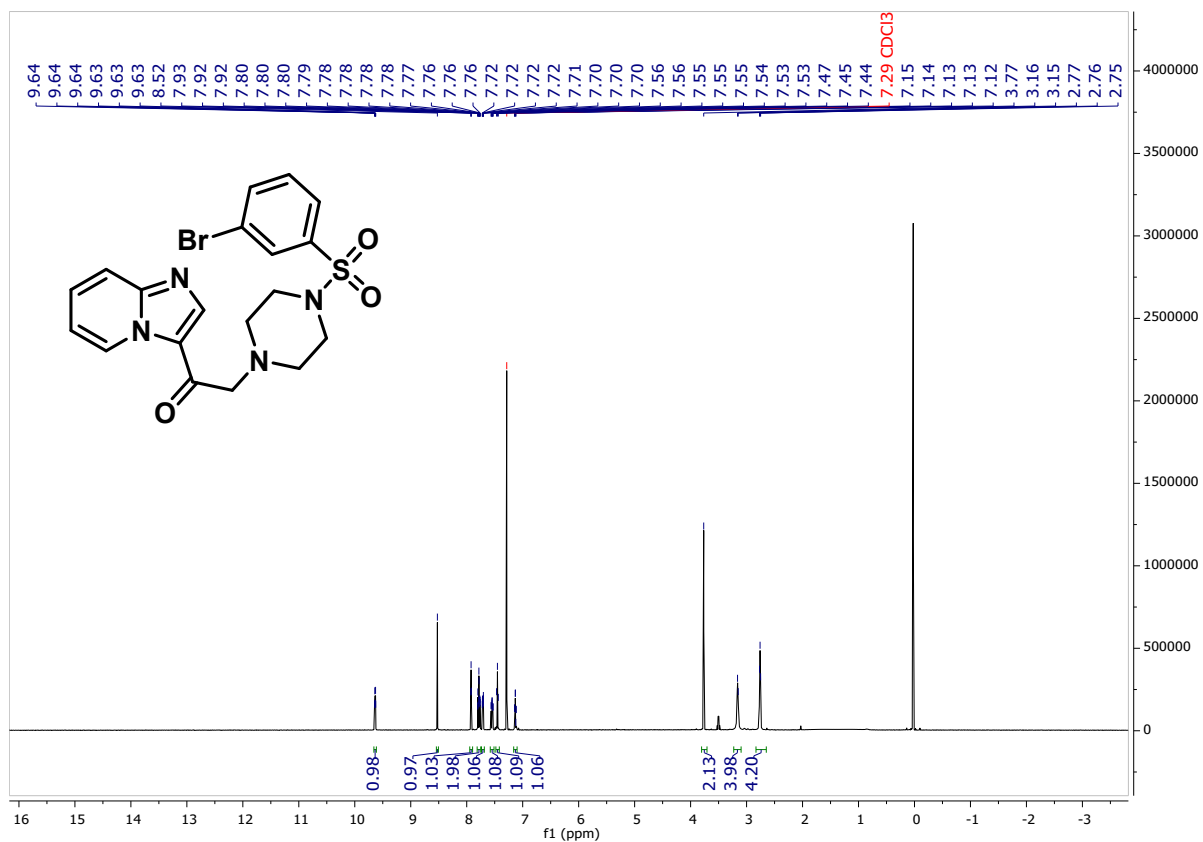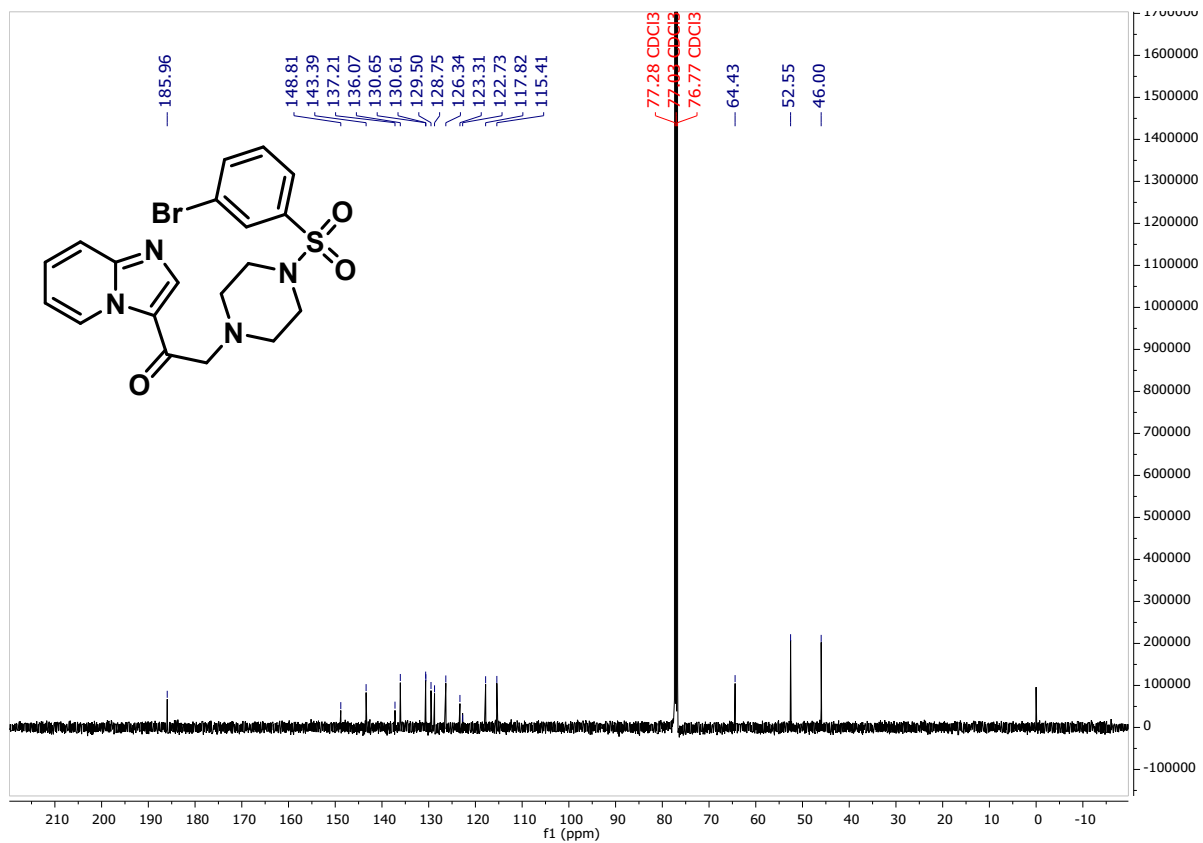

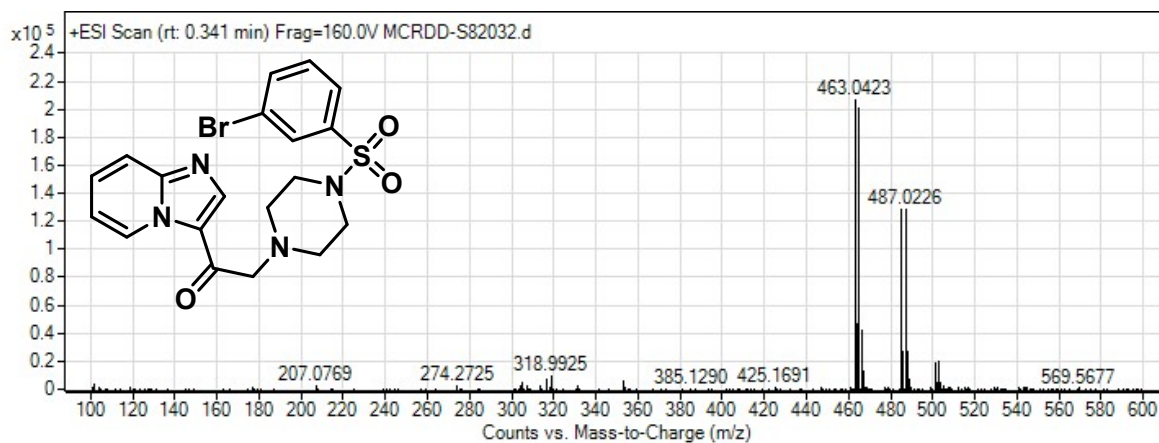

**FIGURE S32: 2-(4-((3-bromophenyl)sulfonyl)piperazin-1-yl)-1-(imidazo[1,2-a]pyridin-3-yl)ethan-1-one (10k) (<sup>1</sup>H NMR, <sup>13</sup>C NMR & HRMS Spectra).**

**33: 2-(4-((5-bromothiophen-2-yl)sulfonyl)piperazin-1-yl)-1-(imidazo[1,2-a]pyridin-3-yl)ethan-1-one**  
**(10m) (<sup>1</sup>H NMR, <sup>13</sup>C NMR & HRMS Spectra)**

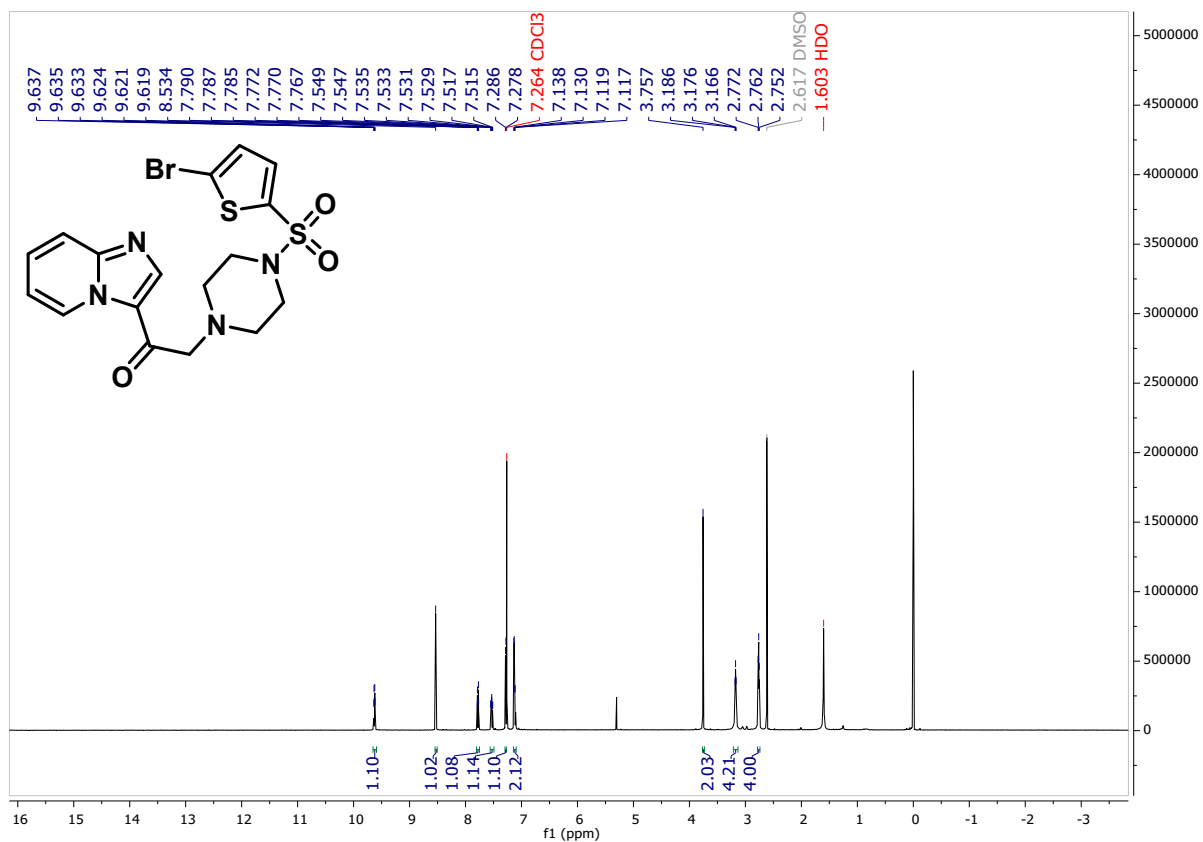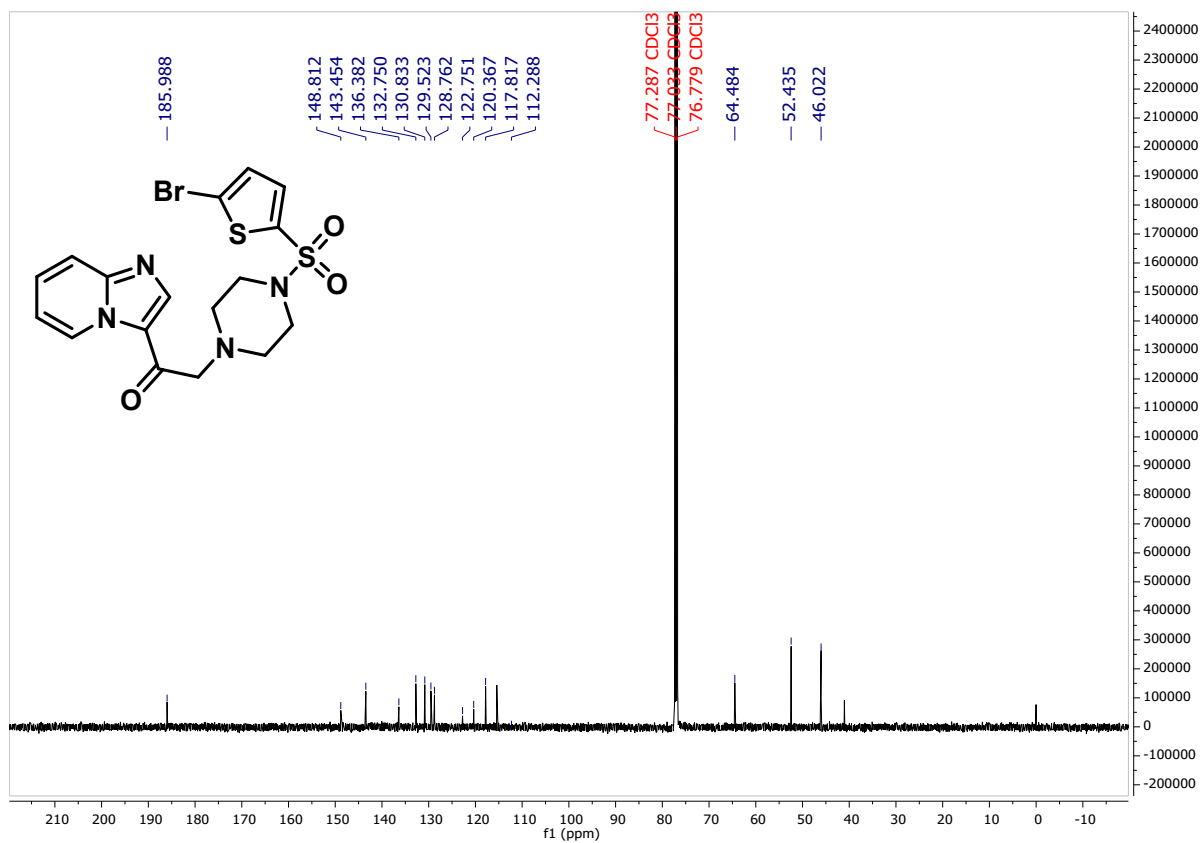

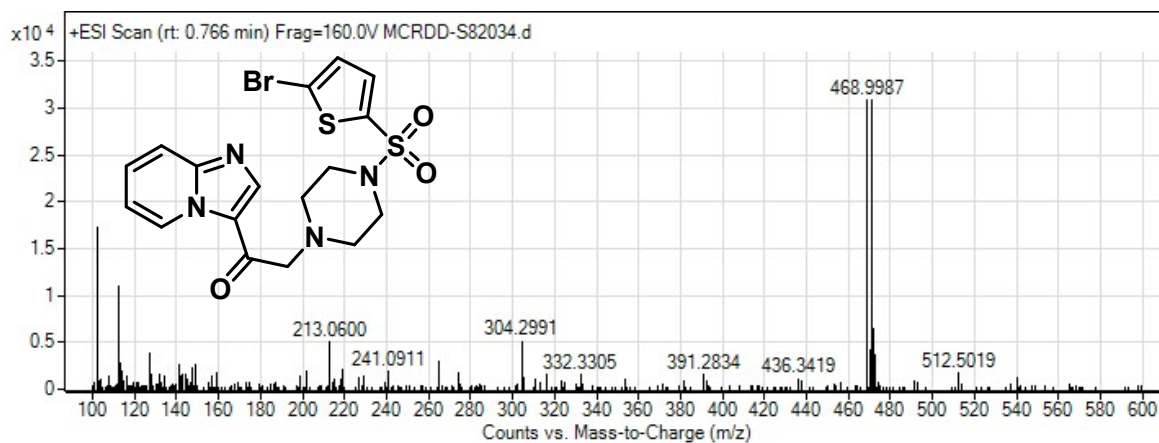

**FIGURE S33: 2-(4-((5-bromothiophen-2-yl)sulfonyl)piperazin-1-yl)-1-(imidazo[1,2-a]pyridin-3-yl)ethan-1-one (10m) (<sup>1</sup>H NMR, <sup>13</sup>C NMR & HRMS Spectra).**



**34: 2-(4-((5-chlorothiophen-2-yl)sulfonyl)piperazin-1-yl)-1-(imidazo[1,2-a]pyridin-3-yl)ethan-1-one**  
**(10q) (<sup>1</sup>H NMR, <sup>13</sup>C NMR & HRMS Spectra)**

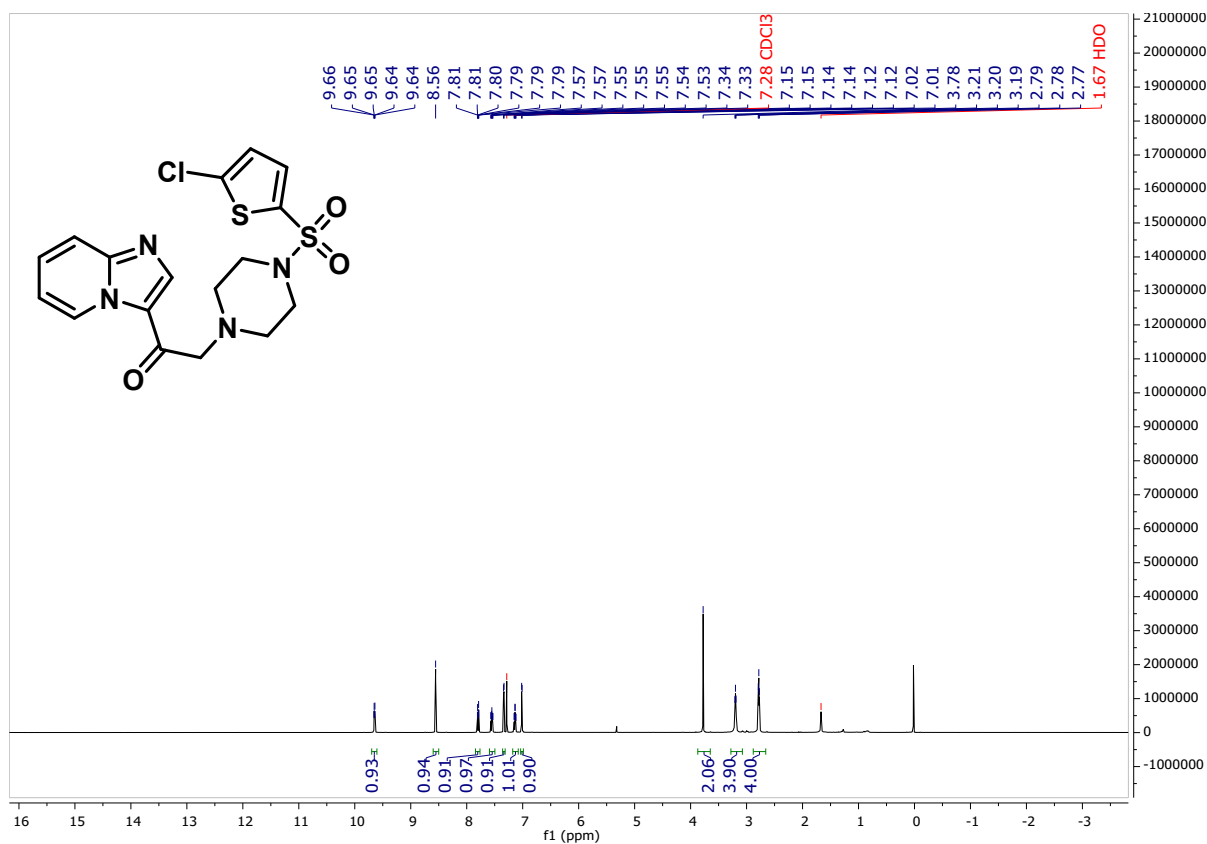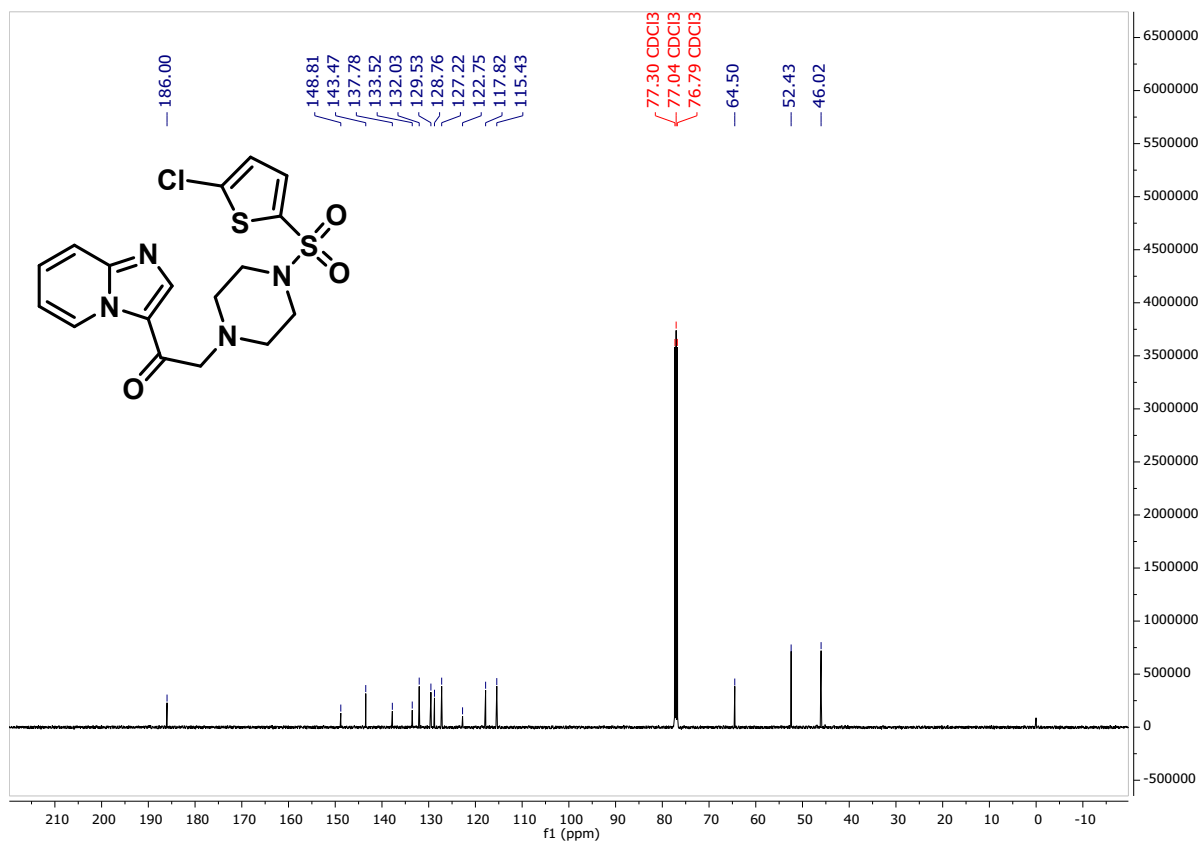

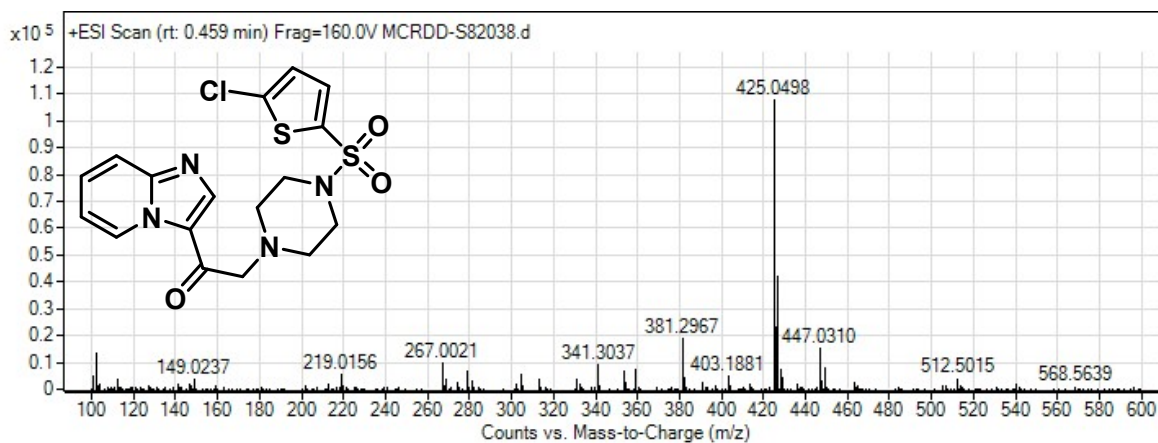

**FIGURE S34:** 2-(4-((5-chlorothiophen-2-yl)sulfonyl)piperazin-1-yl)-1-(imidazo[1,2-a]pyridin-3-yl)ethan-1-one (10q) (<sup>1</sup>H NMR, <sup>13</sup>C NMR & HRMS Spectra).

35: 2-(4-((2-chloro-4-fluorophenyl)sulfonyl)piperazin-1-yl)-1-(imidazo[1,2-a]pyridin-3-yl)ethan-1-one (10p) (<sup>1</sup>H NMR, <sup>13</sup>C NMR, <sup>19</sup>F NMR & HRMS Spectra)

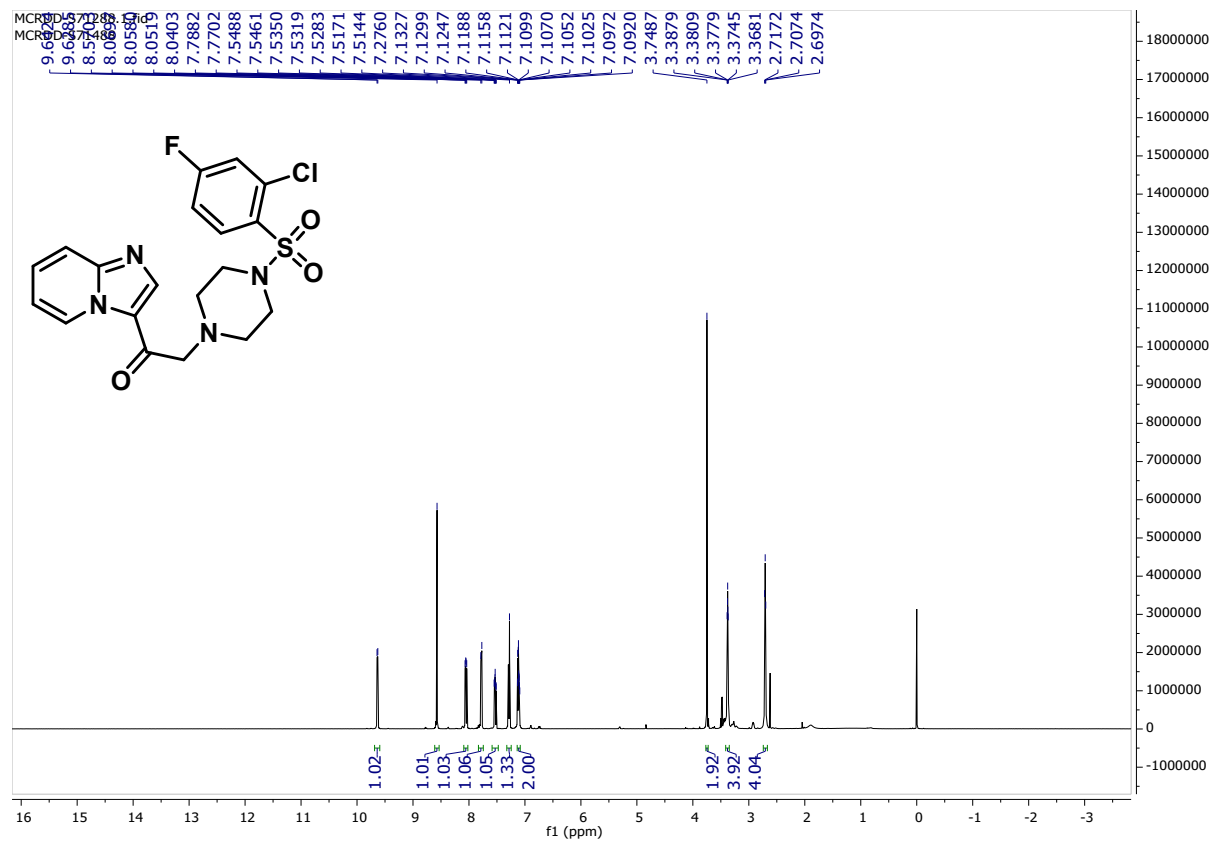

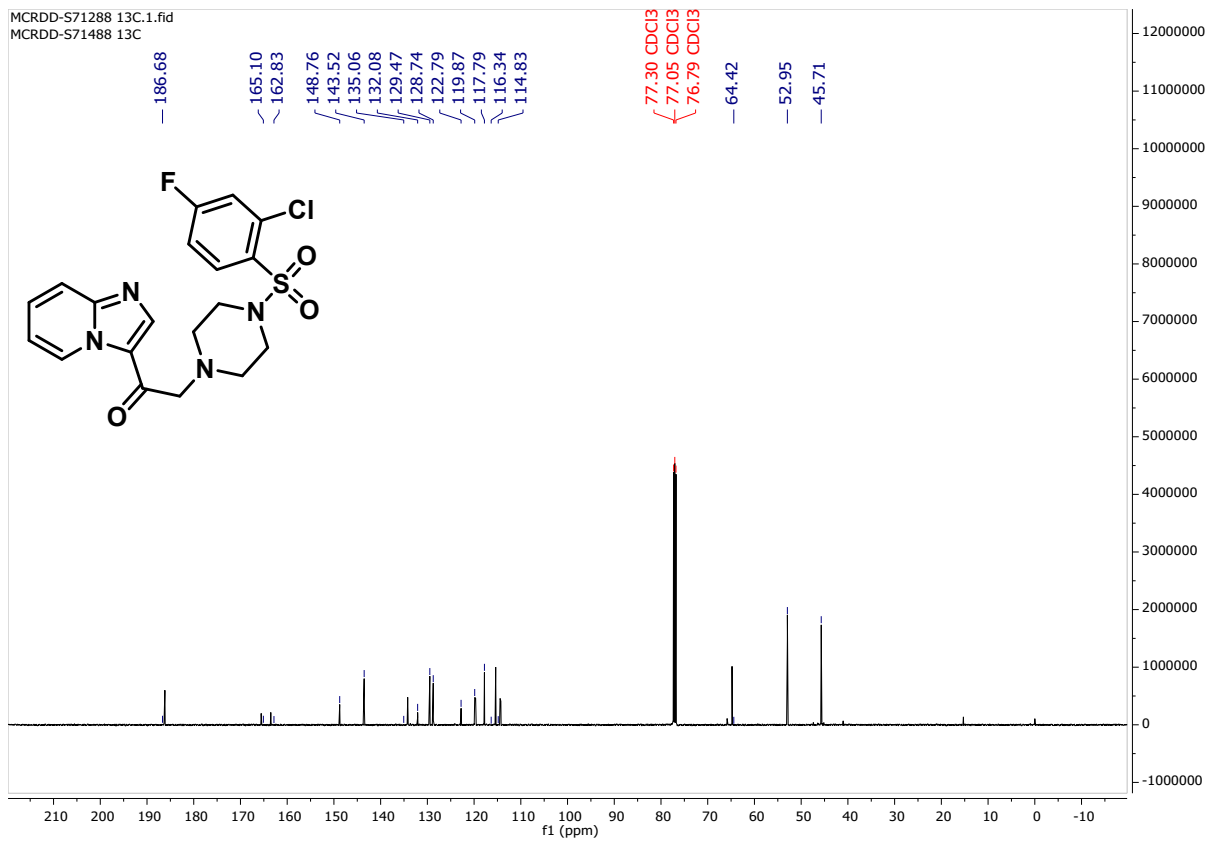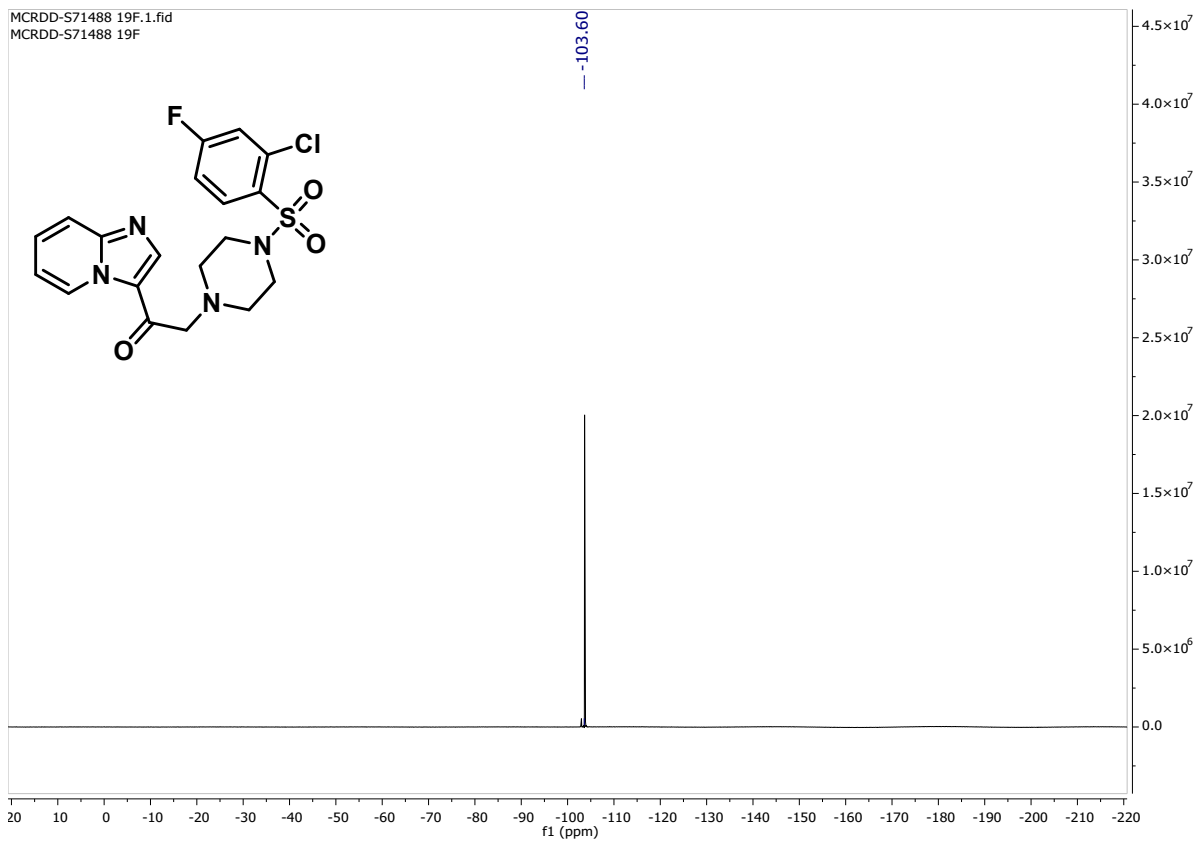

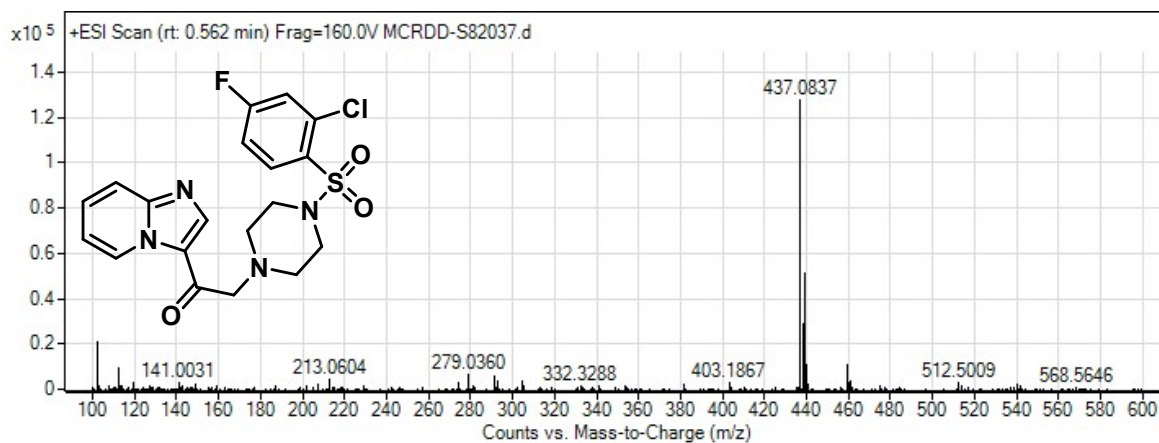

**FIGURE S35: 2-(4-((2-chloro-4-fluorophenyl)sulfonyl)piperazin-1-yl)-1-(imidazo[1,2-a]pyridin-3-yl)ethan-1-one (10p) (<sup>1</sup>H NMR, <sup>13</sup>C NMR, <sup>19</sup>F NMR & HRMS Spectra).**

**36: 2-(4-(cyclohexylsulfonyl)piperazin-1-yl)-1-(imidazo[1,2-a]pyridin-3-yl)ethan-1-one (10) (<sup>1</sup>H NMR, <sup>13</sup>C NMR & HRMS Spectra)**

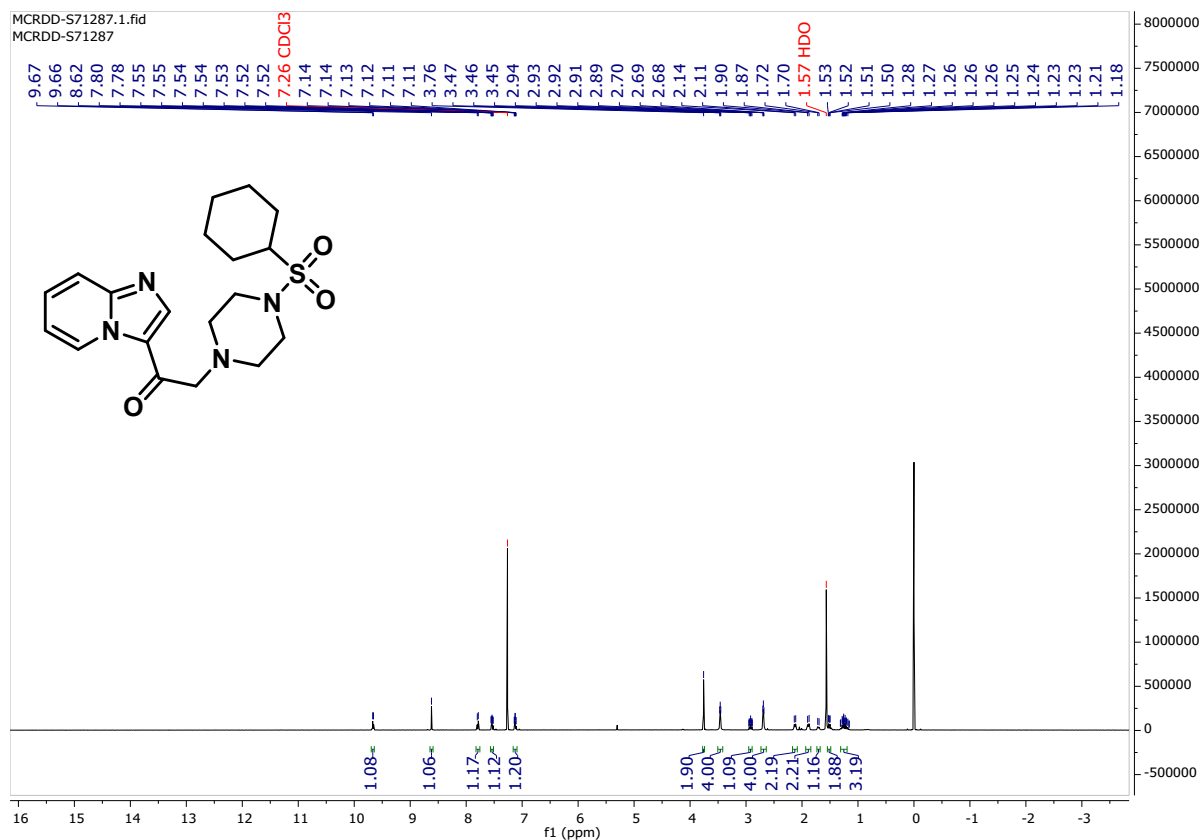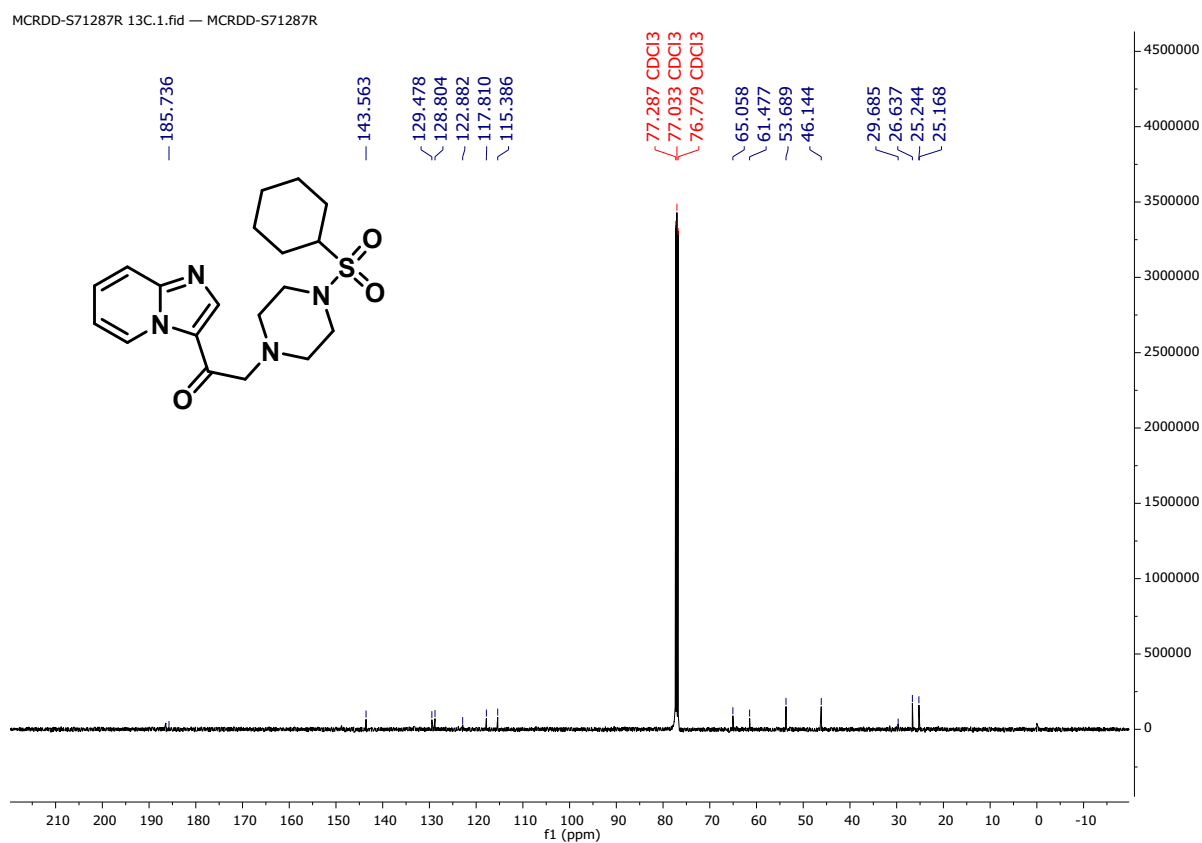

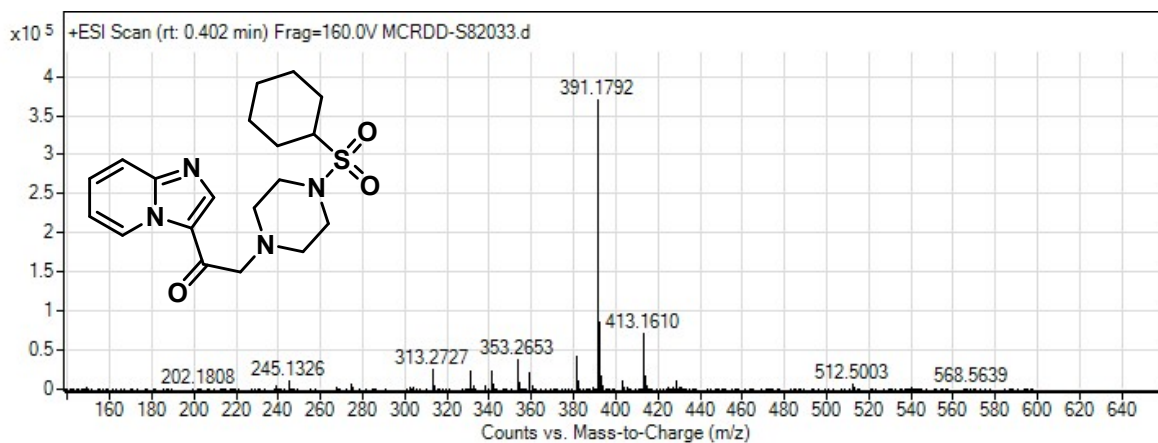

**FIGURE S36: 2-(4-(cyclohexylsulfonyl)piperazin-1-yl)-1-(imidazo[1,2-a]pyridin-3-yl)ethan-1-one (10i) (<sup>1</sup>H NMR, <sup>13</sup>C NMR & HRMS Spectra).**

**37: 1-(imidazo[1,2-a]pyridin-3-yl)-2-(4-(phenylsulfonyl)piperazin-1-yl)ethan-1-one (10b) (<sup>1</sup>H NMR, <sup>13</sup>C NMR & HRMS Spectra)**

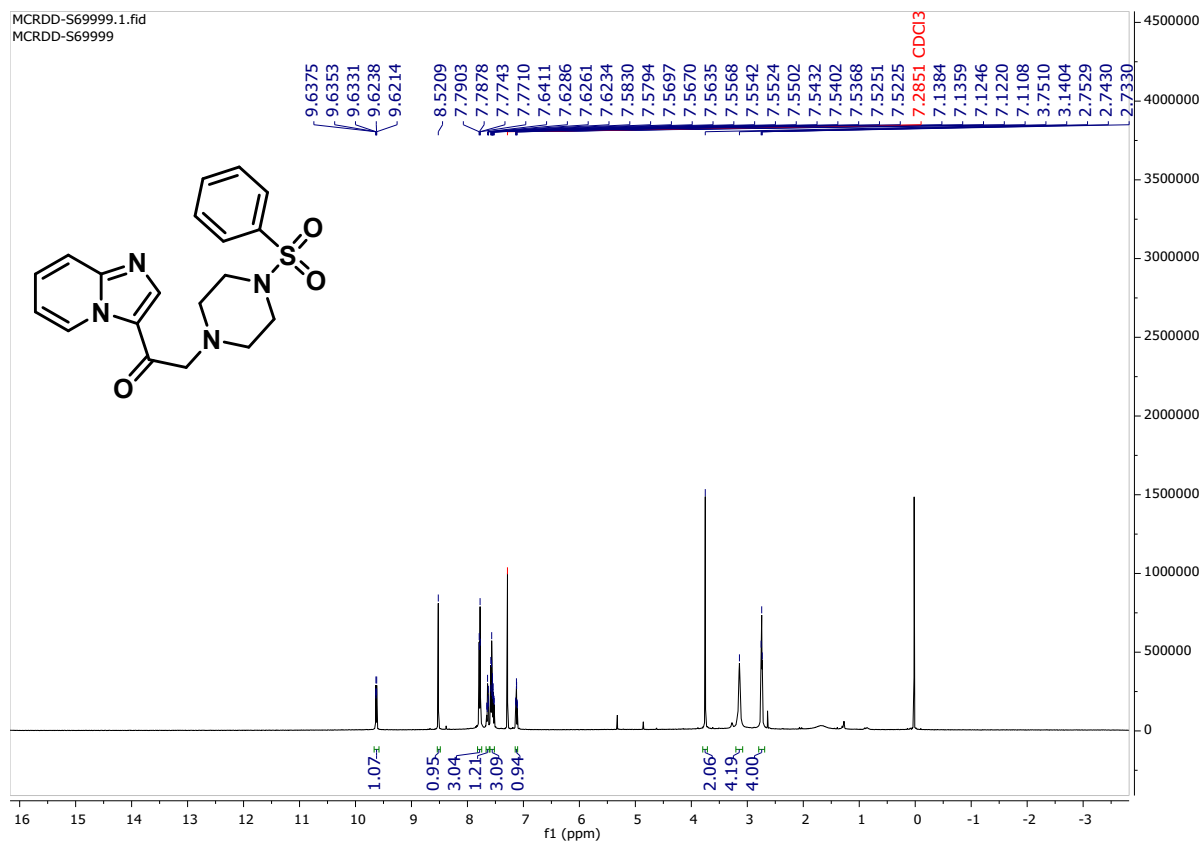

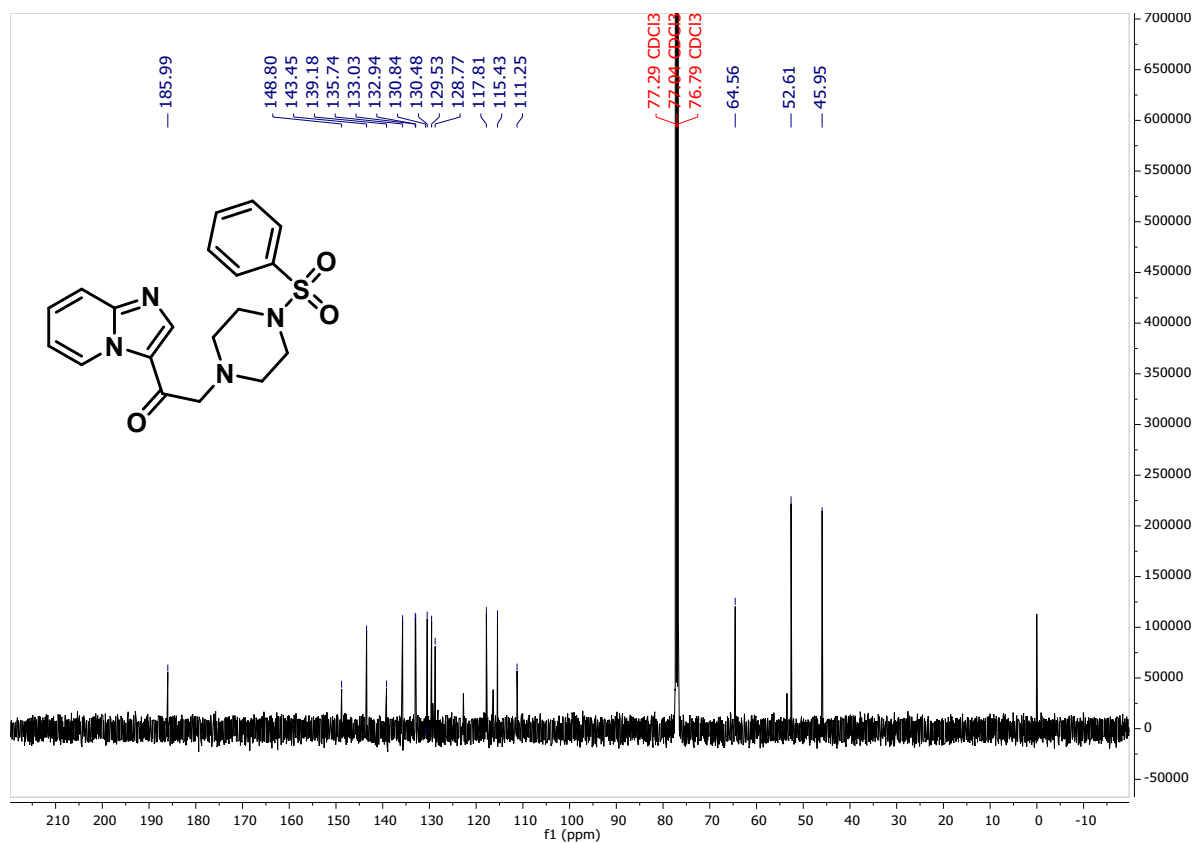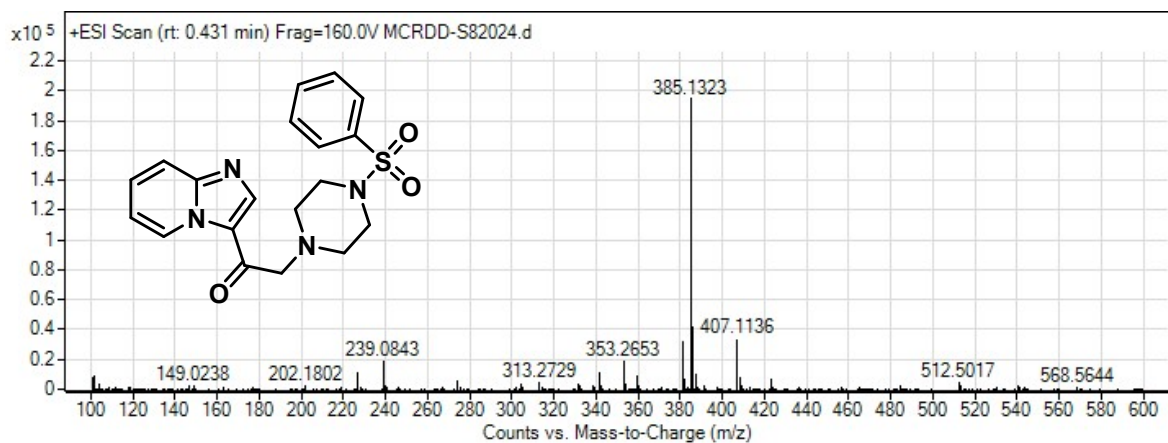

**FIGURE S37: 1-(imidazo[1,2-a]pyridin-3-yl)-2-(4-(phenylsulfonyl)piperazin-1-yl)ethan-1-one (10b) (<sup>1</sup>H NMR, <sup>13</sup>C NMR & HRMS Spectra).**



38: 1-(imidazo[1,2-a]pyridin-3-yl)-2-(4-((4-methoxyphenyl)sulfonyl)piperazin-1-yl)ethan-1-one (10g) (<sup>1</sup>H NMR, <sup>13</sup>C NMR & HRMS Spectra)

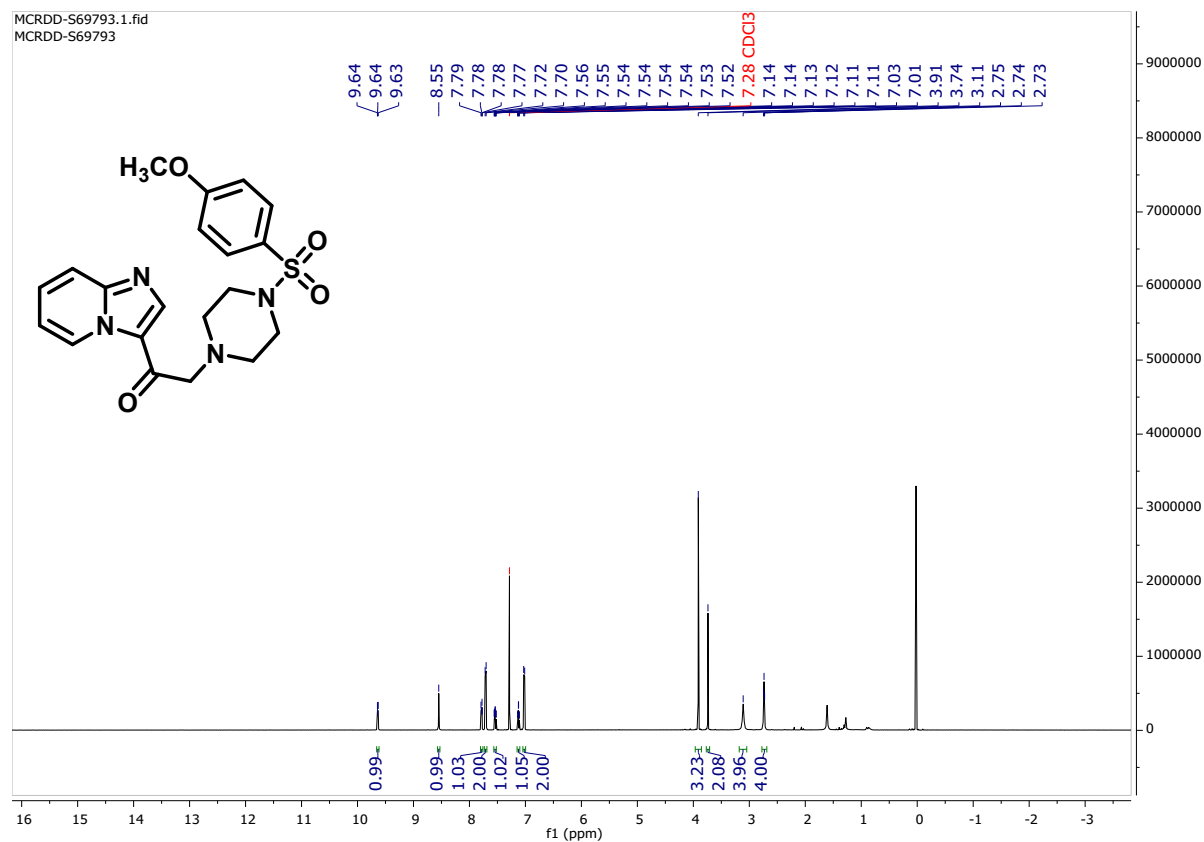

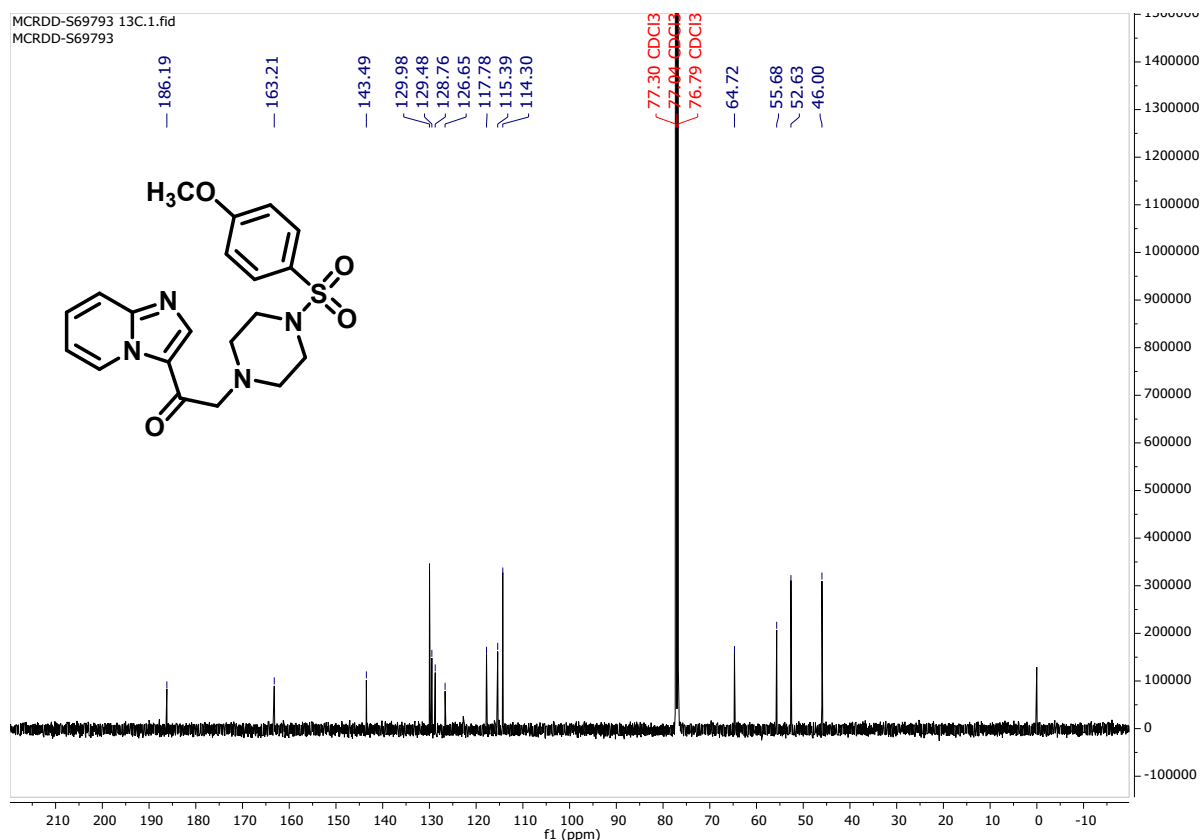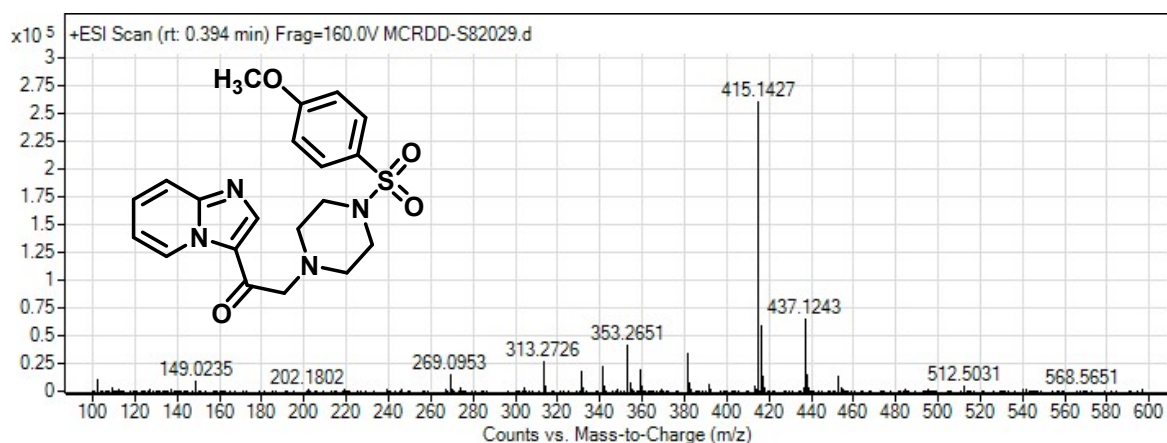

**FIGURE S38: 1-(imidazo[1,2-a]pyridin-3-yl)-2-(4-((4-methoxyphenyl)sulfonyl)piperazin-1-yl)ethan-1-one (10g) ( $^1\text{H}$  NMR,  $^{13}\text{C}$  NMR & HRMS Spectra).**

### 3. HPLC method and purity chromatogram of synthesized compounds

An Agilent 1260 infinity II system with phenomenix kinetic  $\text{C}_{18}$  column (250 × 4.6 mM, 5  $\mu\text{M}$ ) eluted at 1 mL/min with gradient elution having solvent system of water (ultrapure)+ 0.1% formic acid: methanol (procured from ualigens) was used for analyzing the purity of the compounds; 100 ppm of the analyte solution was prepared in HPLC-grade methanol. The method optimized was gradient having a duration of 15 min. The injection volume was 20  $\mu\text{L}$ . The detector

utilized was diode-array detection. The chromatograms revealed purity of more than 95% as provided in the supporting information.

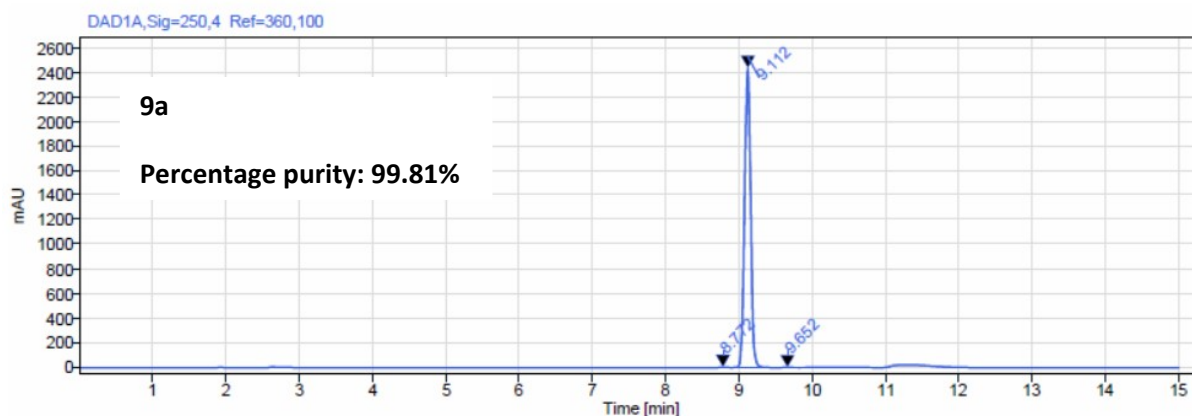

Signal: DAD1A,Sig=250,4 Ref=360,100

| RT [min] | Type | Width [min] | Area       | Height    | Area%   |
|----------|------|-------------|------------|-----------|---------|
| 8.772    | vv   | 0.2333      | 20.5350    | 3.1407    | 0.1446  |
| 9.112    | vv   | 0.5799      | 14171.0470 | 2439.4710 | 99.8171 |
| 9.652    | vv   | 0.3400      | 5.4310     | 0.6964    | 0.0383  |
| Sum      |      |             | 14197.0130 |           |         |

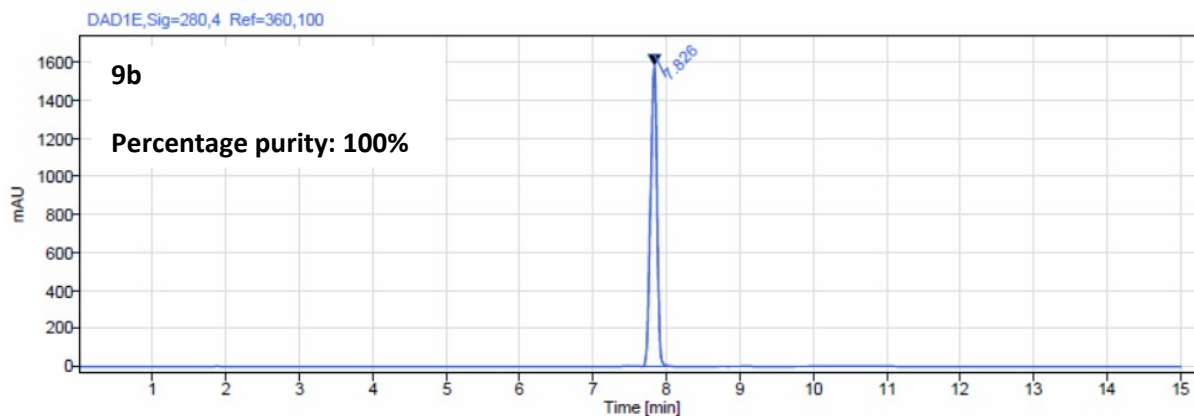

Signal: DAD1E,Sig=280,4 Ref=360,100

| RT [min] | Type | Width [min] | Area      | Height    | Area%    |
|----------|------|-------------|-----------|-----------|----------|
| 7.826    | vv   | 0.4799      | 9704.7405 | 1583.1411 | 100.0000 |
| Sum      |      |             | 9704.7405 |           |          |

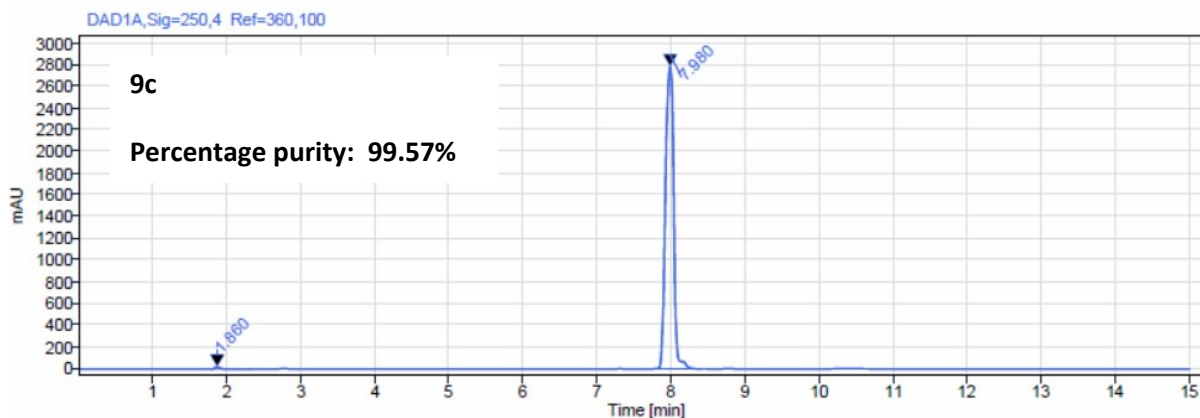

Signal: DAD1A,Sig=250,4 Ref=360,100

| RT [min]   | Type | Width [min] | Area              | Height    | Area%   |
|------------|------|-------------|-------------------|-----------|---------|
| 1.860      | vv   | 0.5733      | 90.8027           | 19.6814   | 0.4213  |
| 7.980      | vv   | 0.6400      | 21459.9336        | 2784.5773 | 99.5787 |
| <b>Sum</b> |      |             | <b>21550.7363</b> |           |         |

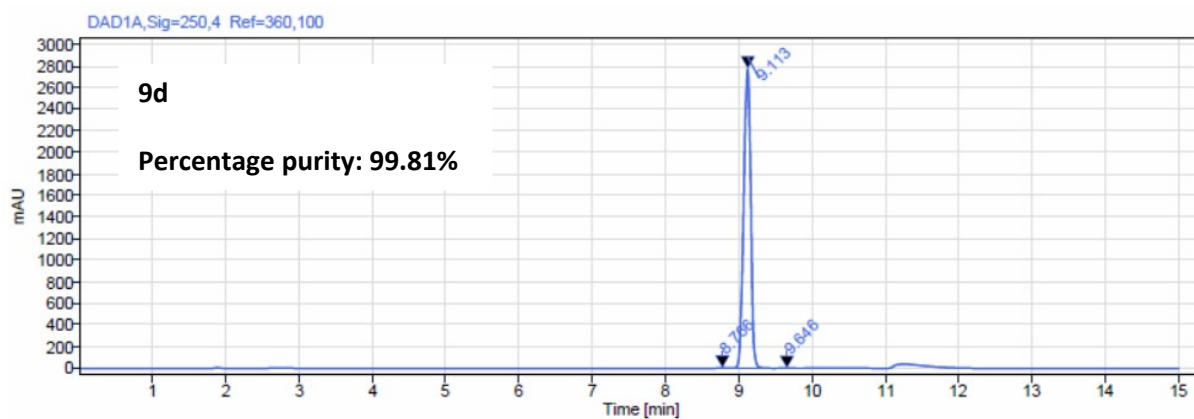

Signal: DAD1A,Sig=250,4 Ref=360,100

| RT [min]   | Type | Width [min] | Area              | Height    | Area%   |
|------------|------|-------------|-------------------|-----------|---------|
| 8.766      | vv   | 0.2400      | 28.1798           | 4.1421    | 0.1504  |
| 9.113      | vv   | 0.5800      | 18700.9105        | 2779.8086 | 99.8107 |
| 9.646      | vv   | 0.3467      | 7.2926            | 0.8883    | 0.0389  |
| <b>Sum</b> |      |             | <b>18736.3829</b> |           |         |

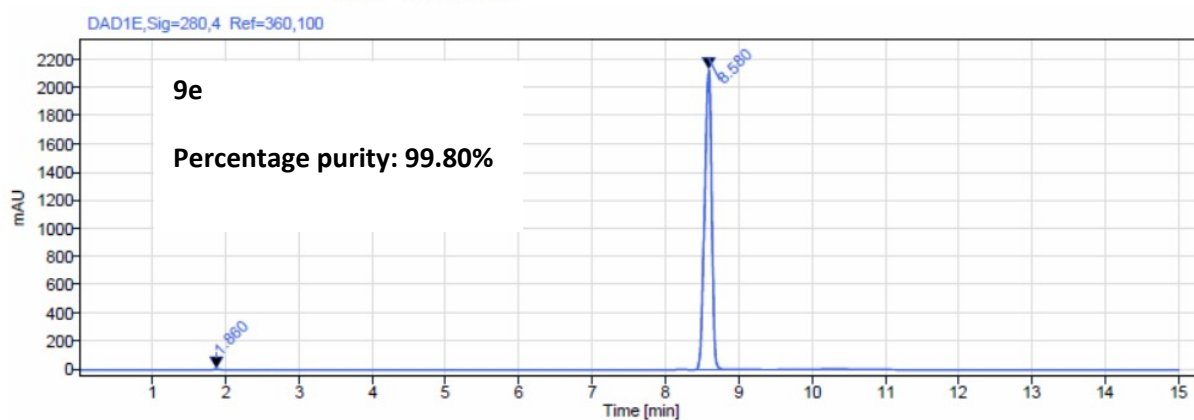

Signal: DAD1E,Sig=280,4 Ref=360,100

| RT [min]   | Type | Width [min] | Area              | Height    | Area%   |
|------------|------|-------------|-------------------|-----------|---------|
| 1.860      | vv   | 0.3733      | 28.1430           | 5.7059    | 0.1954  |
| 8.580      | vv   | 0.5800      | 14376.5338        | 2127.4105 | 99.8046 |
| <b>Sum</b> |      |             | <b>14404.6768</b> |           |         |

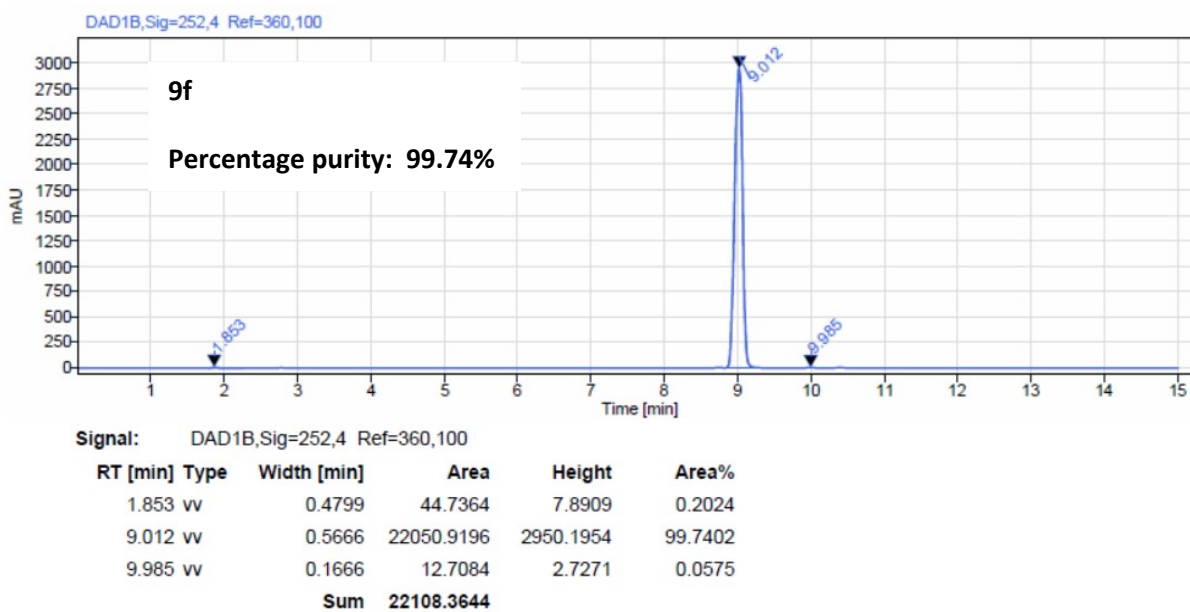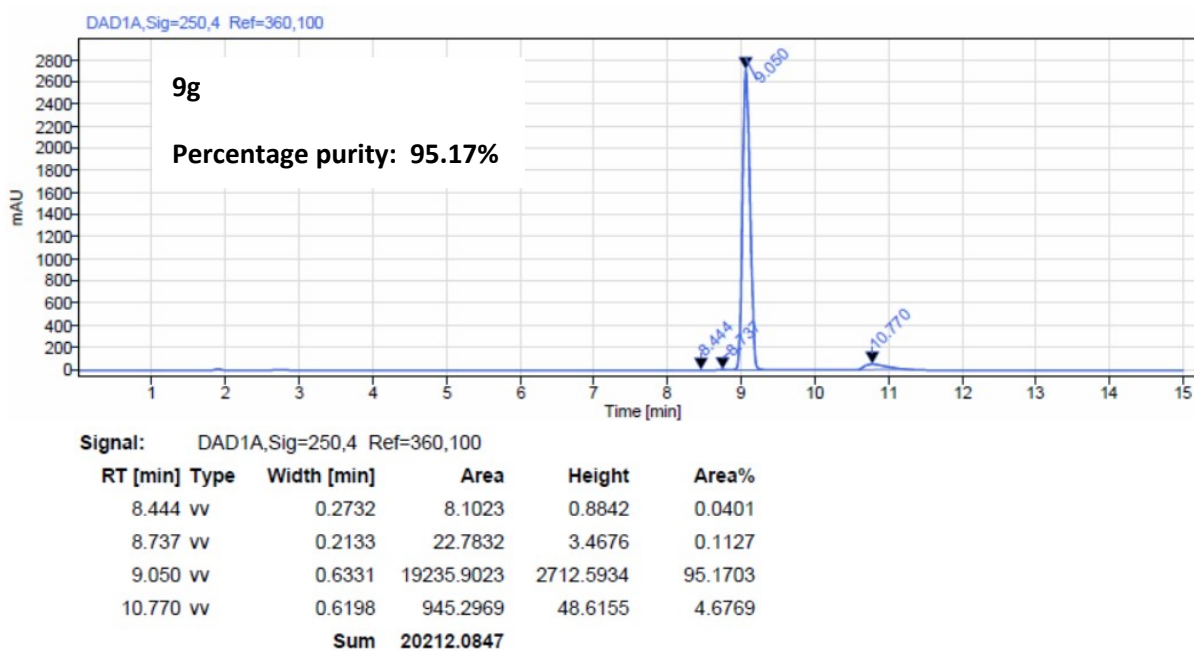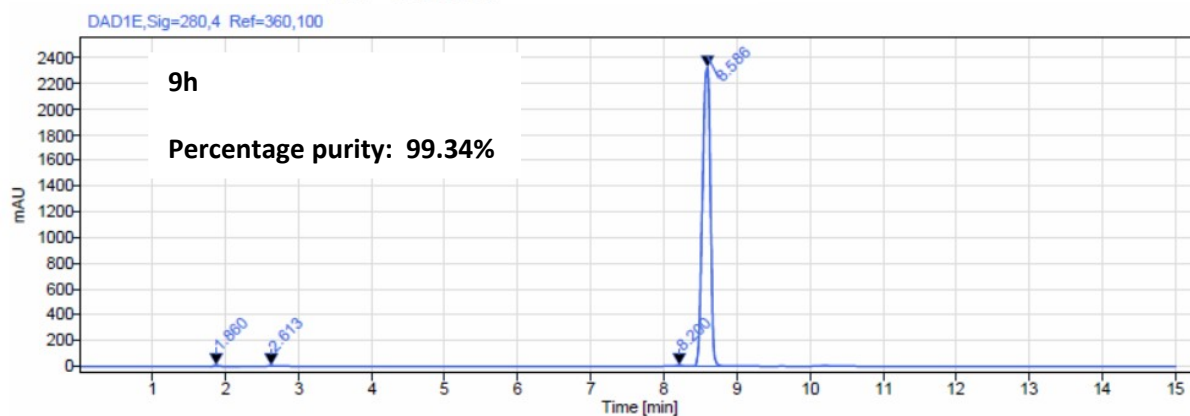

Signal: DAD1E,Sig=280,4 Ref=360,100

| RT [min]   | Type | Width [min] | Area              | Height    | Area%   |
|------------|------|-------------|-------------------|-----------|---------|
| 1.860      | vv   | 0.4133      | 45.6900           | 8.3211    | 0.2585  |
| 2.613      | vv   | 0.2533      | 30.6423           | 4.9430    | 0.1734  |
| 8.200      | vv   | 0.2600      | 40.1094           | 6.0094    | 0.2269  |
| 8.586      | vv   | 0.5933      | 17558.4382        | 2322.1548 | 99.3412 |
| <b>Sum</b> |      |             | <b>17674.8799</b> |           |         |

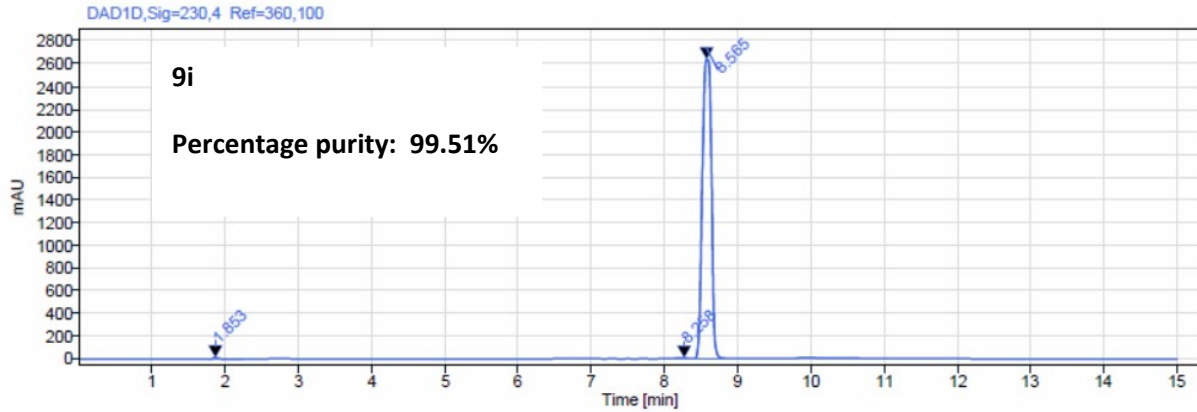

Signal: DAD1D,Sig=230,4 Ref=360,100

| RT [min]   | Type | Width [min] | Area              | Height    | Area%   |
|------------|------|-------------|-------------------|-----------|---------|
| 1.853      | vv   | 0.4532      | 58.2028           | 10.7832   | 0.2542  |
| 8.258      | vv   | 0.3133      | 52.2405           | 5.3281    | 0.2282  |
| 8.565      | vv   | 0.6065      | 22786.4224        | 2639.6219 | 99.5176 |
| <b>Sum</b> |      |             | <b>22896.8658</b> |           |         |

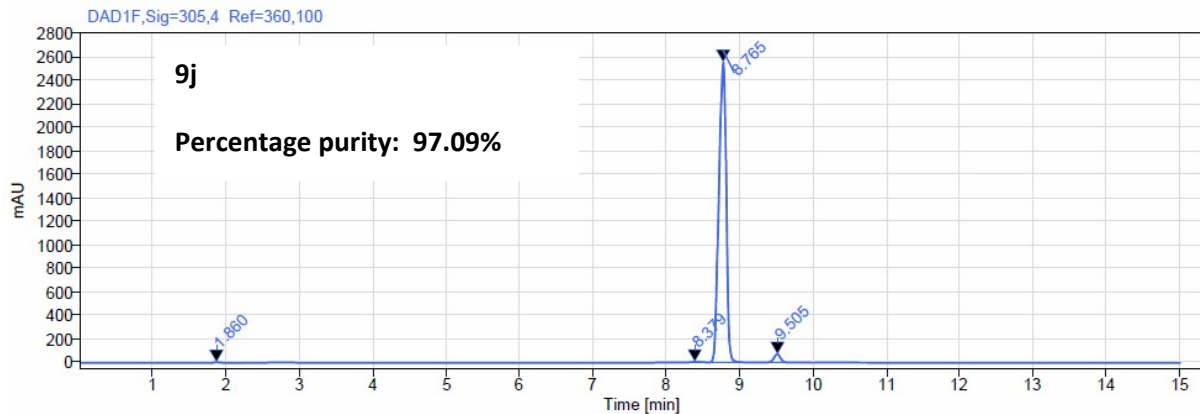

Signal: DAD1F,Sig=305,4 Ref=360,100

| RT [min]   | Type | Width [min] | Area              | Height    | Area%   |
|------------|------|-------------|-------------------|-----------|---------|
| 1.860      | vv   | 0.4066      | 33.2518           | 4.9853    | 0.1823  |
| 8.379      | vv   | 0.3066      | 53.8176           | 6.0174    | 0.2950  |
| 8.765      | vv   | 0.5133      | 17714.1656        | 2555.3427 | 97.0926 |
| 9.505      | vv   | 0.3599      | 443.3830          | 70.4871   | 2.4302  |
| <b>Sum</b> |      |             | <b>18244.6181</b> |           |         |

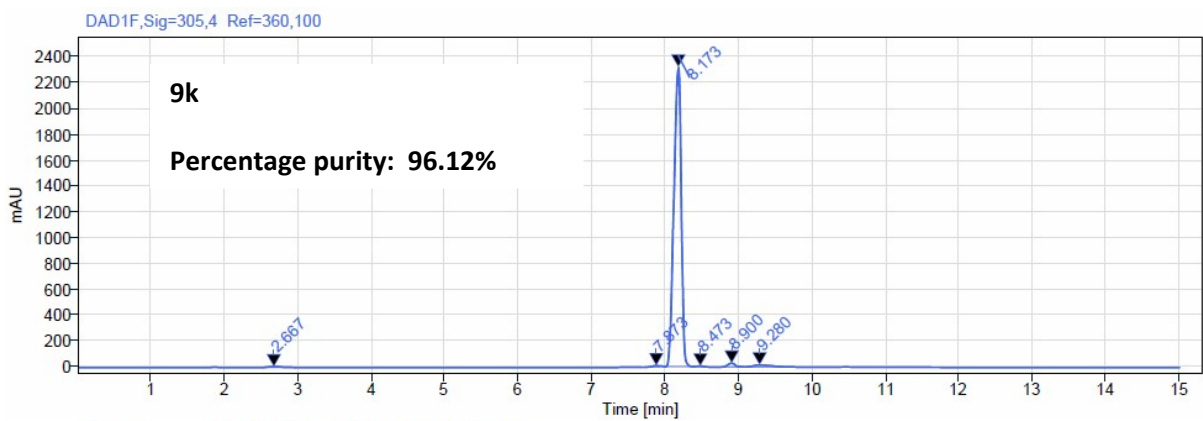

Signal: DAD1F,Sig=305,4 Ref=360,100

| RT [min]   | Type | Width [min] | Area              | Height    | Area%   |
|------------|------|-------------|-------------------|-----------|---------|
| 2.667      | vv   | 0.4533      | 81.7085           | 5.7875    | 0.4884  |
| 7.873      | vv   | 0.2667      | 79.1798           | 9.9498    | 0.4732  |
| 8.173      | vv   | 0.3800      | 16082.8770        | 2318.4472 | 96.1244 |
| 8.473      | vv   | 0.2067      | 36.2747           | 6.7223    | 0.2168  |
| 8.900      | vv   | 0.3400      | 204.8590          | 30.0115   | 1.2244  |
| 9.280      | vv   | 0.6933      | 246.4088          | 14.9429   | 1.4727  |
| <b>Sum</b> |      |             | <b>16731.3078</b> |           |         |

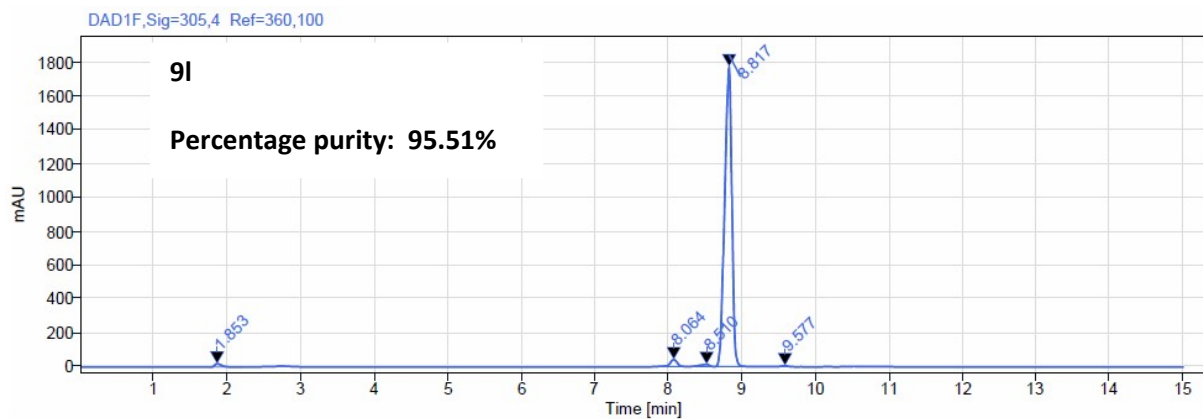

Signal: DAD1F,Sig=305,4 Ref=360,100

| RT [min]   | Type | Width [min] | Area              | Height    | Area%   |
|------------|------|-------------|-------------------|-----------|---------|
| 1.853      | vv   | 0.4399      | 122.4950          | 18.8099   | 0.9676  |
| 8.064      | vv   | 0.4132      | 283.2826          | 42.0222   | 2.2376  |
| 8.510      | vv   | 0.3599      | 126.5318          | 13.8704   | 0.9995  |
| 8.817      | vv   | 0.5198      | 12091.8028        | 1772.6533 | 95.5127 |
| 9.577      | vv   | 0.2133      | 35.7729           | 6.4974    | 0.2826  |
| <b>Sum</b> |      |             | <b>12659.8851</b> |           |         |

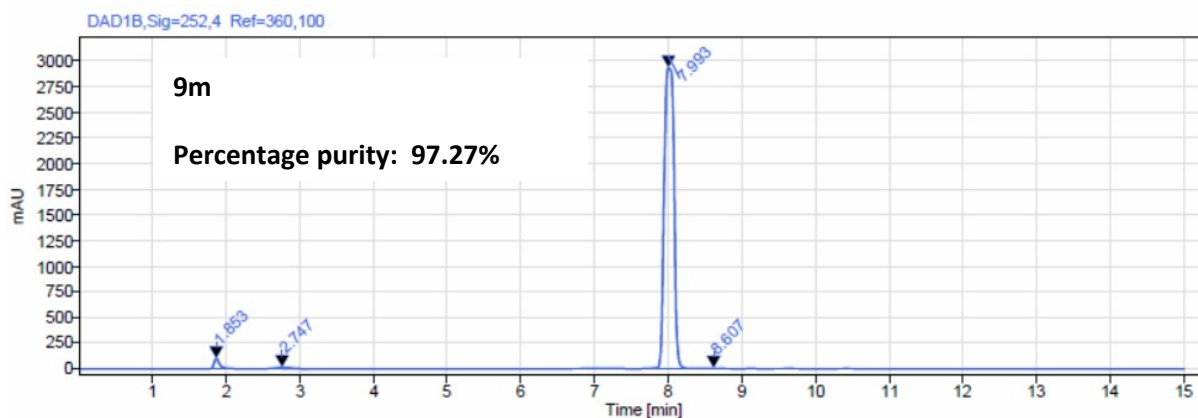

Signal: DAD1B,Sig=252,4 Ref=360,100

| RT [min]   | Type | Width [min] | Area              | Height    | Area%   |
|------------|------|-------------|-------------------|-----------|---------|
| 1.853      | vv   | 0.6133      | 533.5877          | 98.2186   | 1.9255  |
| 2.747      | vv   | 0.7467      | 205.9766          | 13.1184   | 0.7433  |
| 7.993      | vv   | 0.7067      | 26955.0131        | 2940.6557 | 97.2718 |
| 8.607      | vv   | 0.2067      | 16.4572           | 2.6001    | 0.0594  |
| <b>Sum</b> |      |             | <b>27711.0345</b> |           |         |

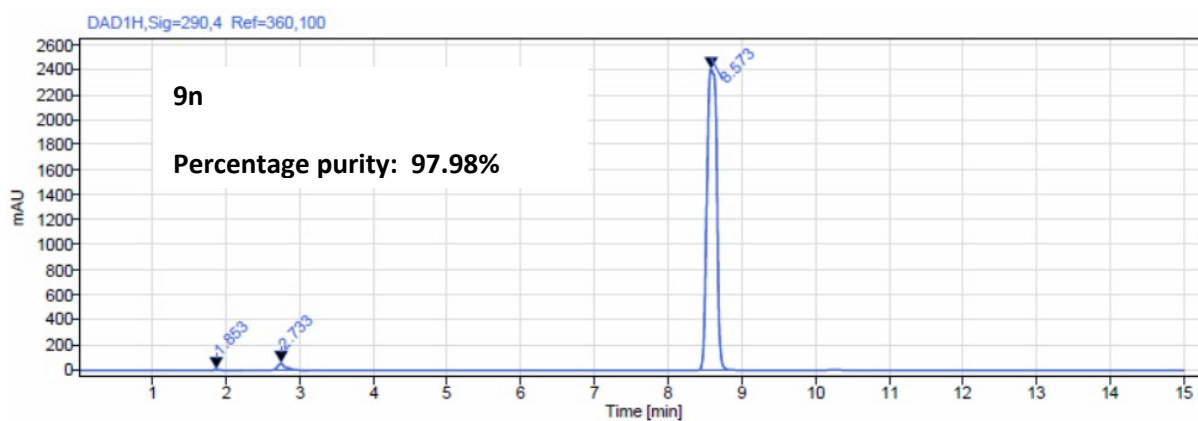

Signal: DAD1H,Sig=290,4 Ref=360,100

| RT [min]   | Type | Width [min] | Area              | Height    | Area%   |
|------------|------|-------------|-------------------|-----------|---------|
| 1.853      | vv   | 0.4400      | 42.1839           | 7.5443    | 0.1856  |
| 2.733      | vv   | 0.5200      | 415.0866          | 55.6977   | 1.8264  |
| 8.573      | vv   | 0.6533      | 22269.2835        | 2405.0970 | 97.9879 |
| <b>Sum</b> |      |             | <b>22726.5540</b> |           |         |

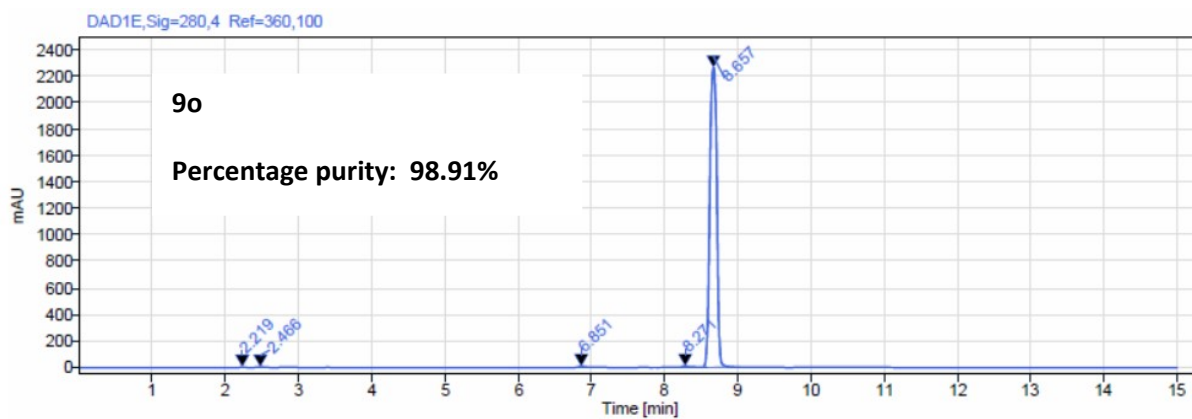



Signal: DAD1E,Sig=280,4 Ref=360,100

| RT [min]   | Type | Width [min] | Area              | Height    | Area%   |
|------------|------|-------------|-------------------|-----------|---------|
| 2.219      | vv   | 0.1666      | 14.7879           | 3.3469    | 0.0977  |
| 2.466      | vv   | 0.3665      | 36.4757           | 4.4190    | 0.2409  |
| 6.851      | vv   | 0.3399      | 55.2425           | 7.3588    | 0.3648  |
| 8.271      | vv   | 0.2932      | 57.7924           | 7.9042    | 0.3817  |
| 8.657      | vv   | 0.5465      | 14977.2234        | 2269.0087 | 98.9149 |
| <b>Sum</b> |      |             | <b>15141.5220</b> |           |         |

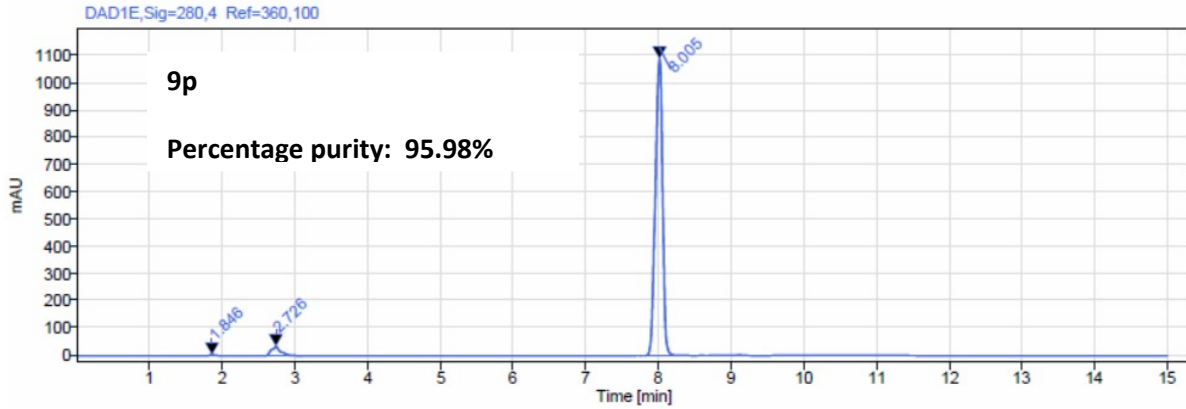

Signal: DAD1E,Sig=280,4 Ref=360,100

| RT [min]   | Type | Width [min] | Area             | Height    | Area%   |
|------------|------|-------------|------------------|-----------|---------|
| 1.846      | vv   | 0.2933      | 17.1509          | 3.5232    | 0.2182  |
| 2.726      | vv   | 0.5199      | 298.4970         | 34.1620   | 3.7975  |
| 8.005      | vv   | 0.4732      | 7544.7477        | 1088.4034 | 95.9843 |
| <b>Sum</b> |      |             | <b>7860.3955</b> |           |         |

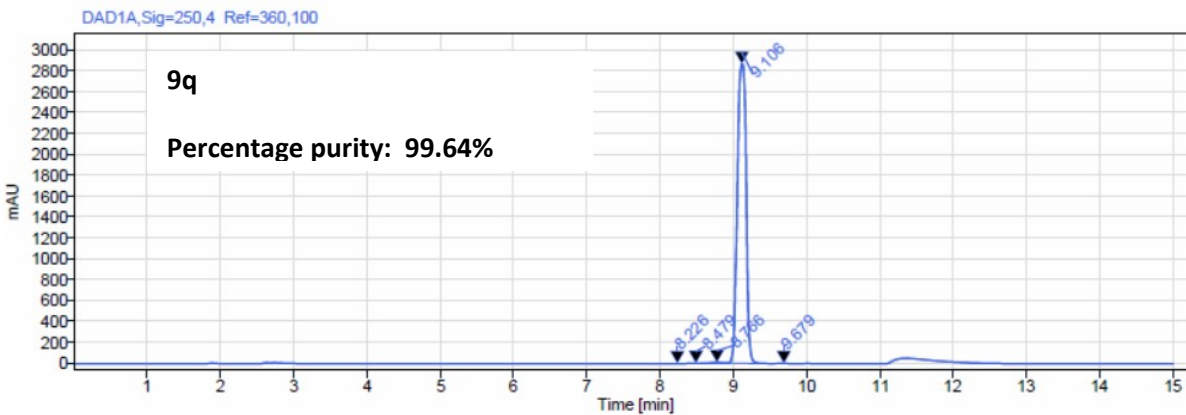

Signal: DAD1A,Sig=250,4 Ref=360,100

| RT [min]   | Type | Width [min] | Area              | Height    | Area%   |
|------------|------|-------------|-------------------|-----------|---------|
| 8.226      | vv   | 0.3866      | 9.6552            | 0.6606    | 0.0403  |
| 8.479      | vv   | 0.2533      | 9.9724            | 1.3360    | 0.0416  |
| 8.766      | vv   | 0.3000      | 52.1198           | 7.4798    | 0.2175  |
| 9.106      | vv   | 0.5733      | 23880.5842        | 2865.1959 | 99.6495 |
| 9.679      | vv   | 0.3133      | 12.2392           | 1.6555    | 0.0511  |
| <b>Sum</b> |      |             | <b>23964.5709</b> |           |         |

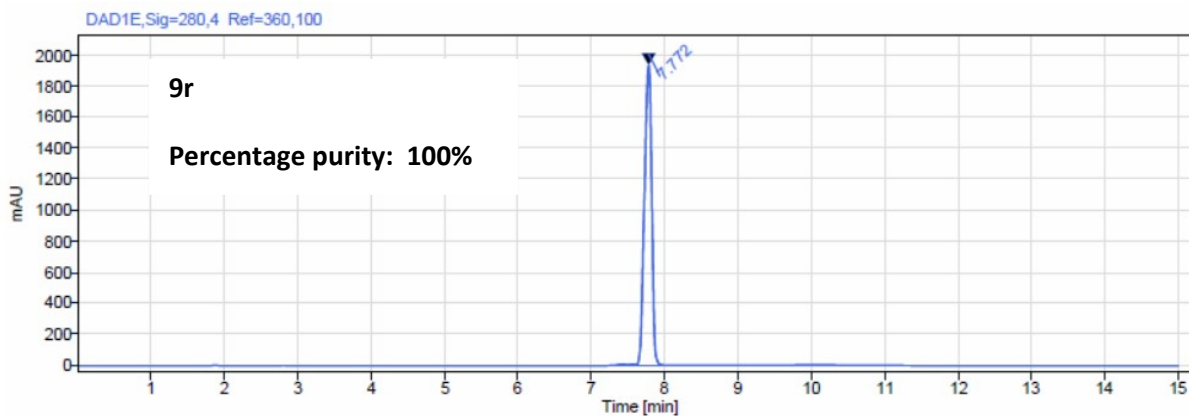

Signal: DAD1E,Sig=280,4 Ref=360,100

| RT [min]   | Type | Width [min] | Area              | Height    | Area%    |
|------------|------|-------------|-------------------|-----------|----------|
| 7.772      | w    | 0.7798      | 13395.8125        | 1933.7625 | 100.0000 |
| <b>Sum</b> |      |             | <b>13395.8125</b> |           |          |

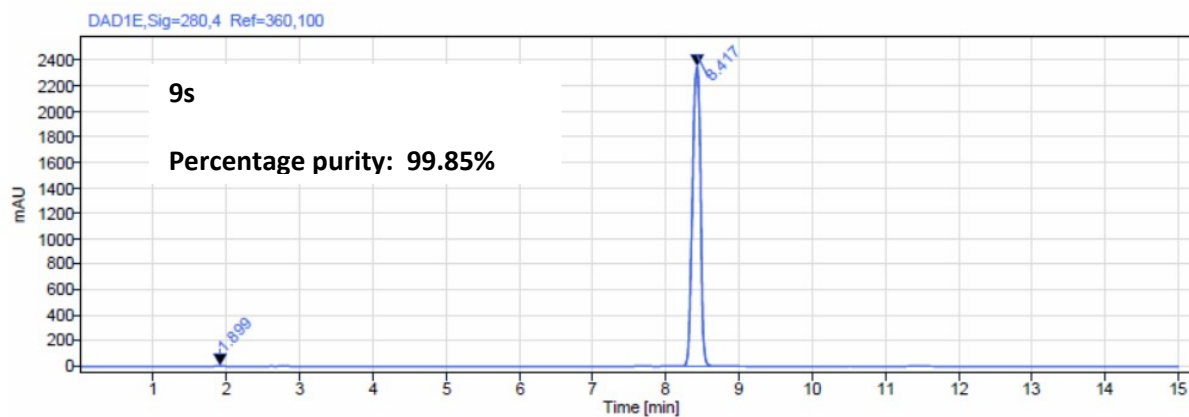

Signal: DAD1E,Sig=280,4 Ref=360,100

| RT [min]   | Type | Width [min] | Area              | Height    | Area%   |
|------------|------|-------------|-------------------|-----------|---------|
| 1.899      | w    | 0.2999      | 26.3706           | 3.4103    | 0.1470  |
| 8.417      | w    | 0.5198      | 17913.0833        | 2352.5411 | 99.8530 |
| <b>Sum</b> |      |             | <b>17939.4539</b> |           |         |

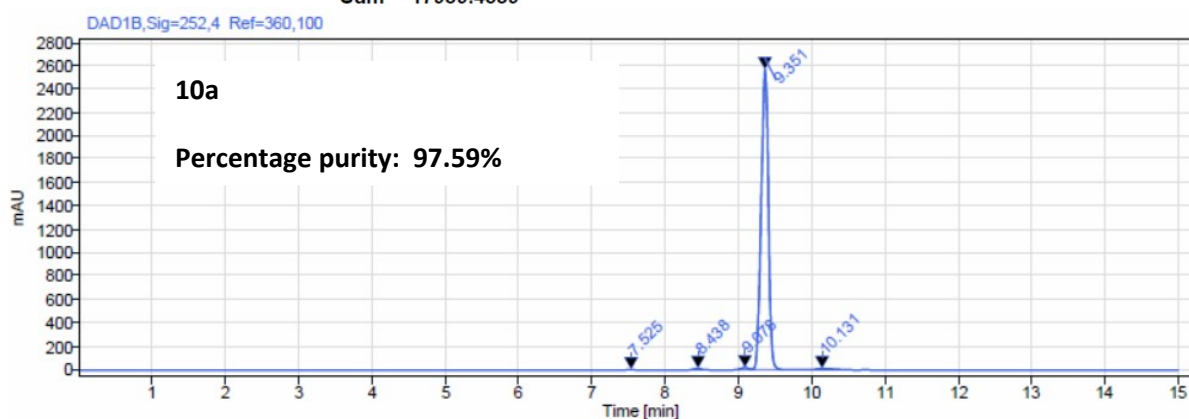

Signal: DAD1B,Sig=252,4 Ref=360,100

| RT [min]   | Type | Width [min] | Area              | Height    | Area%   |
|------------|------|-------------|-------------------|-----------|---------|
| 7.525      | w    | 0.1866      | 23.9422           | 4.1821    | 0.1328  |
| 8.438      | w    | 0.3399      | 96.7206           | 13.3148   | 0.5364  |
| 9.078      | w    | 0.2599      | 116.6160          | 17.7177   | 0.6468  |
| 9.351      | w    | 0.5199      | 17595.6815        | 2568.1155 | 97.5913 |
| 10.131     | w    | 0.8398      | 197.0150          | 11.2506   | 1.0927  |
| <b>Sum</b> |      |             | <b>18029.9753</b> |           |         |

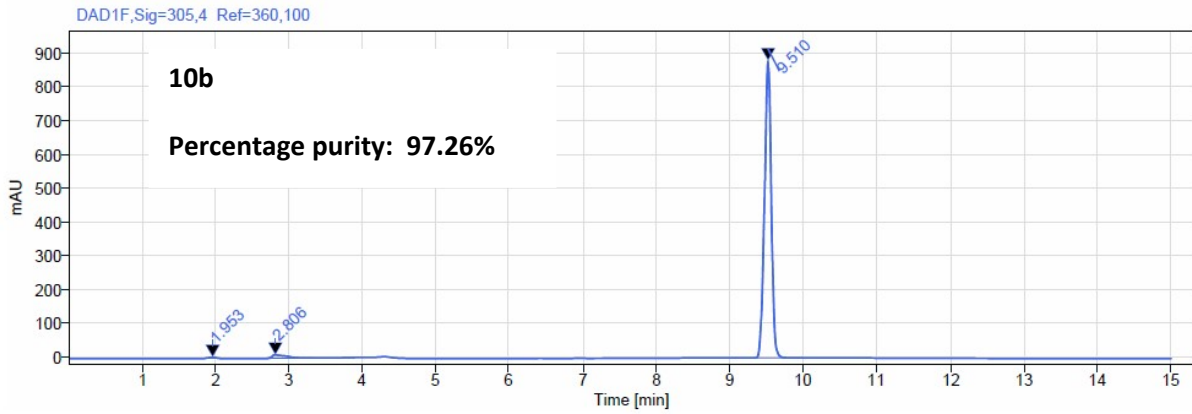

Signal: DAD1F,Sig=305,4 Ref=360,100

| RT [min]   | Type | Width [min] | Area             | Height   | Area%   |
|------------|------|-------------|------------------|----------|---------|
| 1.953      | vv   | 0.2199      | 18.5197          | 3.3654   | 0.3197  |
| 2.806      | vv   | 0.6265      | 139.7612         | 10.3722  | 2.4124  |
| 9.510      | vv   | 0.6664      | 5635.1149        | 878.8148 | 97.2679 |
| <b>Sum</b> |      |             | <b>5793.3957</b> |          |         |

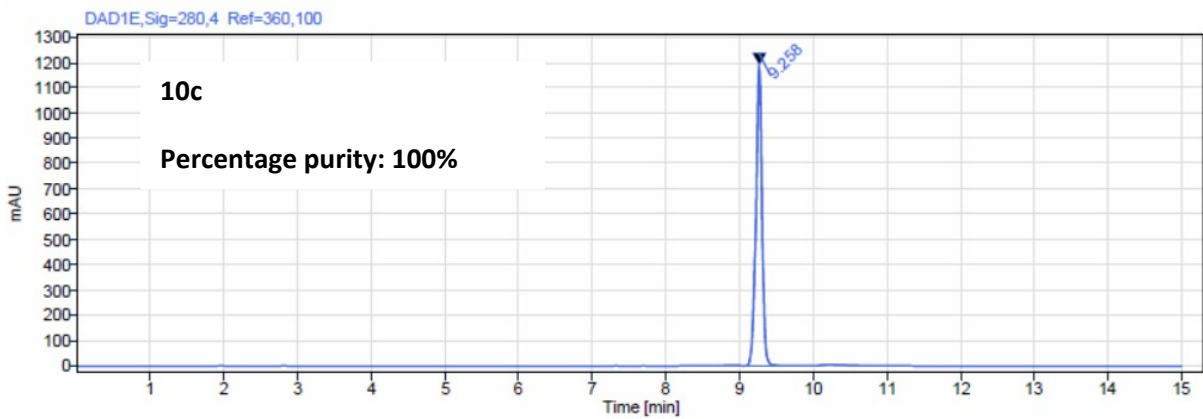

Signal: DAD1E,Sig=280,4 Ref=360,100

| RT [min]   | Type | Width [min] | Area             | Height    | Area%    |
|------------|------|-------------|------------------|-----------|----------|
| 9.258      | vv   | 0.5865      | 6832.0171        | 1189.9179 | 100.0000 |
| <b>Sum</b> |      |             | <b>6832.0171</b> |           |          |

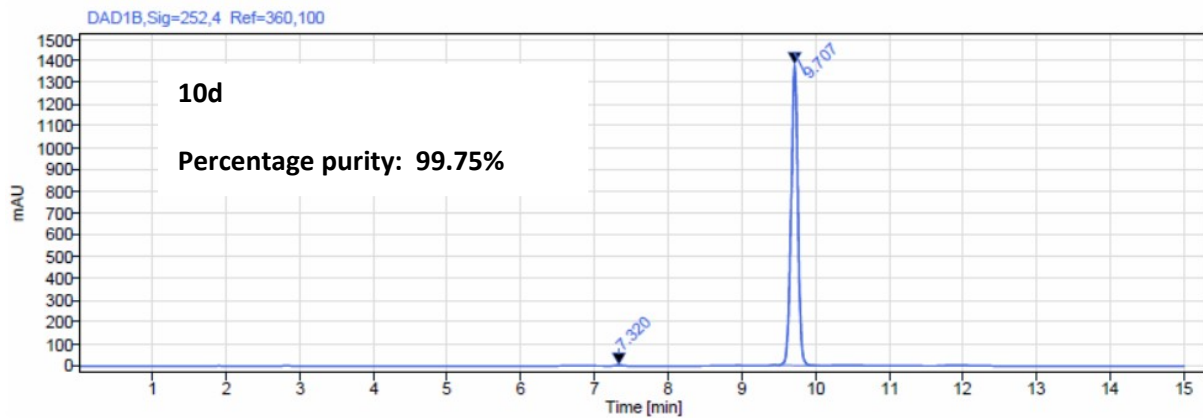

Signal: DAD1B,Sig=252,4 Ref=360,100

| RT [min]   | Type | Width [min] | Area             | Height    | Area%   |
|------------|------|-------------|------------------|-----------|---------|
| 7.320      | vv   | 0.3000      | 22.0272          | 3.7468    | 0.2490  |
| 9.707      | vv   | 0.5467      | 8825.5994        | 1382.3538 | 99.7510 |
| <b>Sum</b> |      |             | <b>8847.6266</b> |           |         |

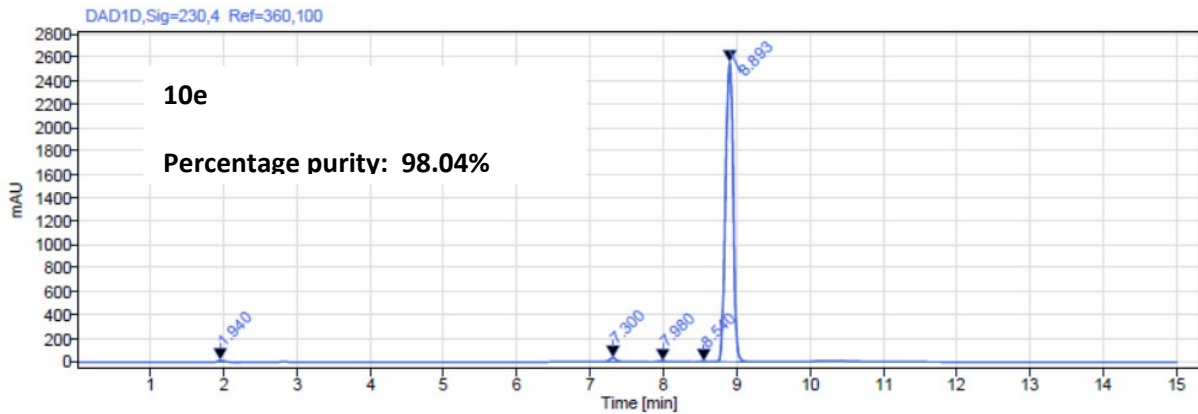

Signal: DAD1D,Sig=230,4 Ref=360,100

| RT [min]   | Type | Width [min] | Area              | Height    | Area%   |
|------------|------|-------------|-------------------|-----------|---------|
| 1.940      | wv   | 0.3667      | 86.0832           | 15.0717   | 0.4521  |
| 7.300      | wv   | 0.4000      | 225.0548          | 34.2710   | 1.1820  |
| 7.980      | wv   | 0.2533      | 45.9076           | 6.6024    | 0.2411  |
| 8.540      | wv   | 0.1733      | 15.3813           | 3.0130    | 0.0808  |
| 8.893      | wv   | 0.7000      | 18667.7886        | 2562.4954 | 98.0440 |
| <b>Sum</b> |      |             | <b>19040.2156</b> |           |         |

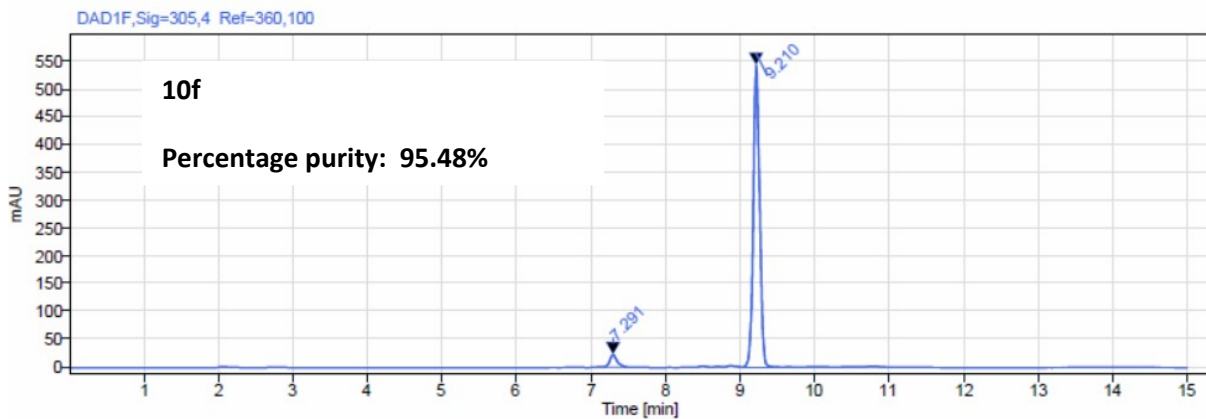

Signal: DAD1F,Sig=305,4 Ref=360,100

| RT [min]   | Type | Width [min] | Area             | Height   | Area%   |
|------------|------|-------------|------------------|----------|---------|
| 7.291      | wv   | 0.3799      | 151.5867         | 22.5128  | 4.5126  |
| 9.210      | wv   | 0.5332      | 3207.6310        | 542.5119 | 95.4874 |
| <b>Sum</b> |      |             | <b>3359.2177</b> |          |         |

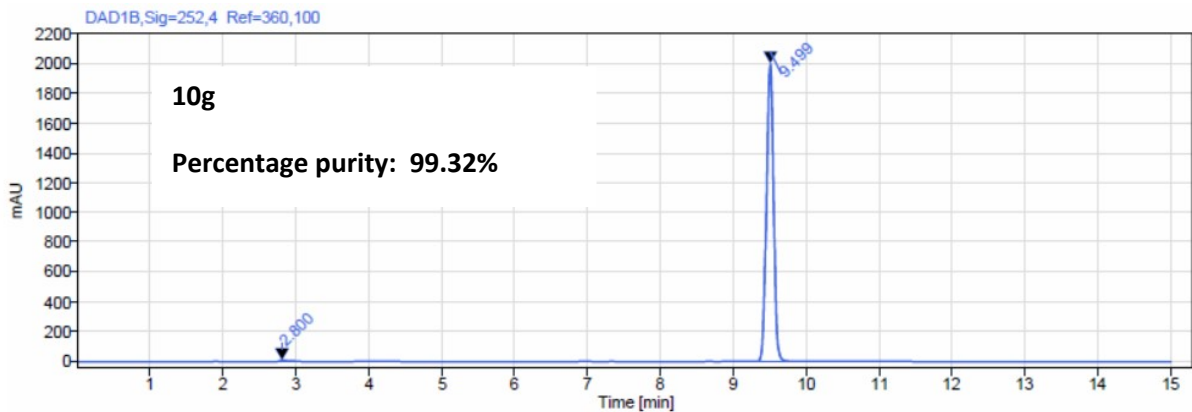

Signal: DAD1B,Sig=252,4 Ref=360,100

| RT [min]   | Type | Width [min] | Area              | Height    | Area%   |
|------------|------|-------------|-------------------|-----------|---------|
| 2.800      | wv   | 0.4666      | 92.5552           | 8.0082    | 0.6744  |
| 9.499      | wv   | 0.5933      | 13632.2404        | 2003.9324 | 99.3256 |
| <b>Sum</b> |      |             | <b>13724.7956</b> |           |         |

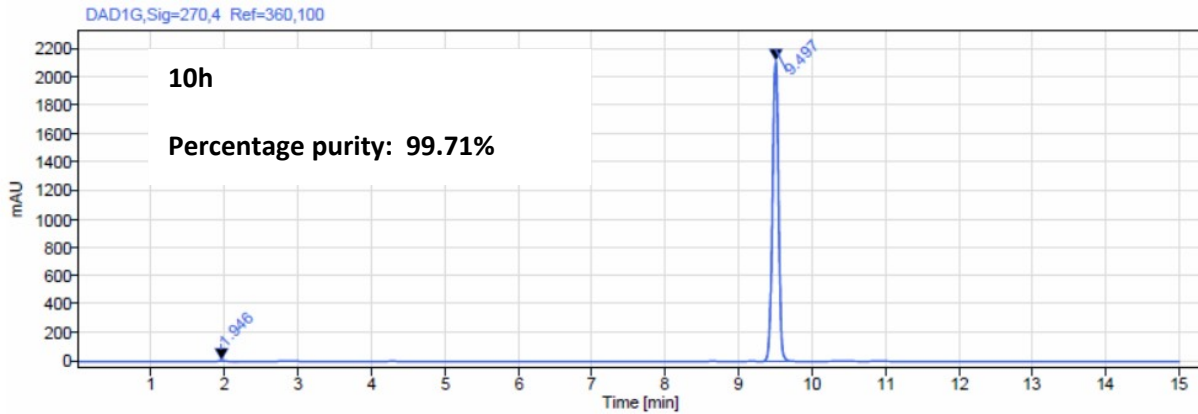

Signal: DAD1G,Sig=270,4 Ref=360,100

| RT [min]   | Type | Width [min] | Area              | Height    | Area%   |
|------------|------|-------------|-------------------|-----------|---------|
| 1.946      | vv   | 0.3066      | 34.6383           | 6.2132    | 0.2816  |
| 9.497      | vv   | 0.5398      | 12267.6148        | 2113.4650 | 99.7184 |
| <b>Sum</b> |      |             | <b>12302.2531</b> |           |         |

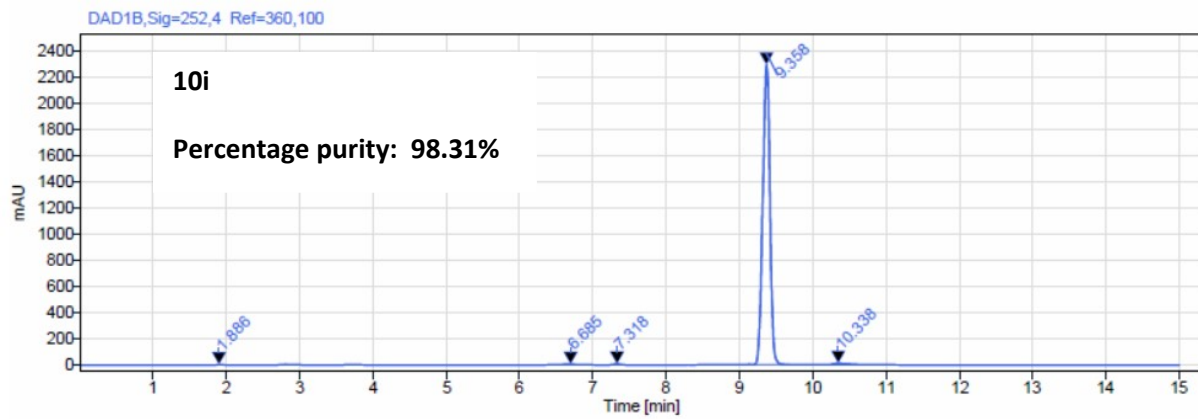

Signal: DAD1B,Sig=252,4 Ref=360,100

| RT [min]   | Type | Width [min] | Area              | Height    | Area%   |
|------------|------|-------------|-------------------|-----------|---------|
| 1.886      | vv   | 0.6132      | 27.4555           | 4.1013    | 0.1723  |
| 6.685      | vv   | 0.2399      | 32.2695           | 4.6925    | 0.2026  |
| 7.318      | vv   | 0.3399      | 45.1289           | 7.4766    | 0.2833  |
| 9.358      | vv   | 0.5066      | 15661.7179        | 2297.2160 | 98.3142 |
| 10.338     | vv   | 0.6465      | 163.6924          | 11.2937   | 1.0276  |
| <b>Sum</b> |      |             | <b>15930.2642</b> |           |         |

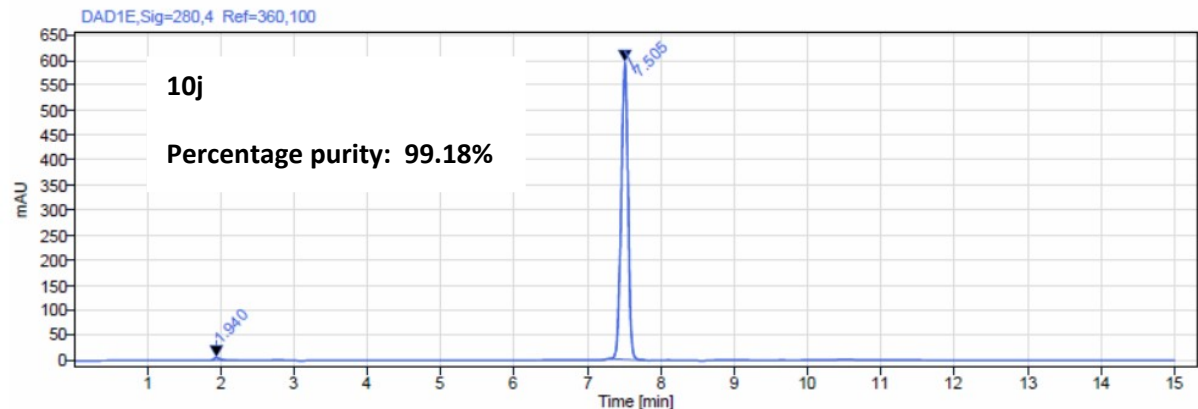

Signal: DAD1E,Sig=280,4 Ref=360,100

| RT [min]   | Type | Width [min] | Area             | Height   | Area%   |
|------------|------|-------------|------------------|----------|---------|
| 1.940      | vv   | 0.3733      | 31.7439          | 5.6654   | 0.8192  |
| 7.505      | vv   | 0.5199      | 3843.0104        | 594.9956 | 99.1808 |
| <b>Sum</b> |      |             | <b>3874.7543</b> |          |         |

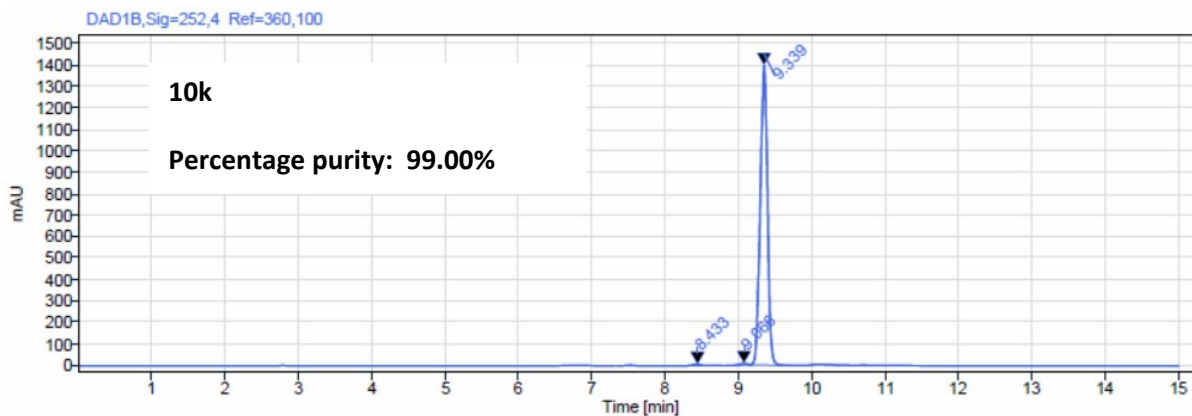

Signal: DAD1B,Sig=252,4 Ref=360,100

| RT [min]   | Type | Width [min] | Area             | Height    | Area%   |
|------------|------|-------------|------------------|-----------|---------|
| 8.433      | vv   | 0.3066      | 41.2627          | 5.6117    | 0.4285  |
| 9.066      | vv   | 0.2600      | 54.1124          | 7.8843    | 0.5620  |
| 9.339      | vv   | 0.5466      | 9533.9745        | 1396.2365 | 99.0095 |
| <b>Sum</b> |      |             | <b>9629.3495</b> |           |         |

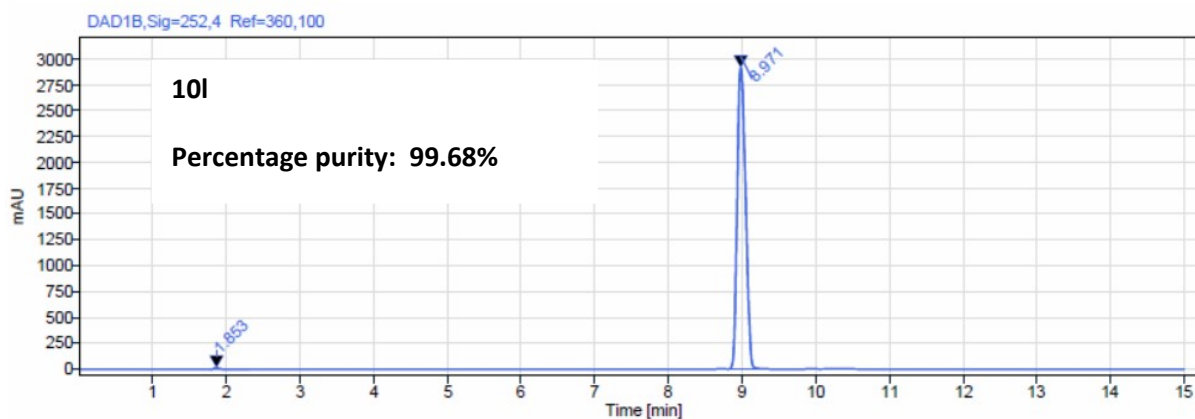

Signal: DAD1B,Sig=252,4 Ref=360,100

| RT [min]   | Type | Width [min] | Area              | Height    | Area%   |
|------------|------|-------------|-------------------|-----------|---------|
| 1.853      | vv   | 0.5399      | 72.7946           | 13.0269   | 0.3157  |
| 8.971      | vv   | 0.6399      | 22985.1671        | 2917.6678 | 99.6843 |
| <b>Sum</b> |      |             | <b>23057.9617</b> |           |         |

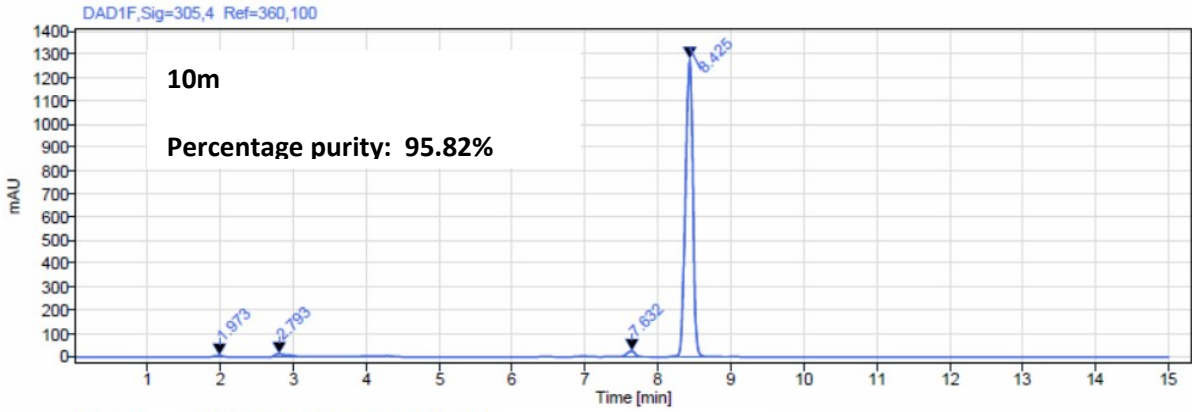

Signal: DAD1F,Sig=305,4 Ref=360,100

| RT [min]   | Type | Width [min] | Area             | Height    | Area%   |
|------------|------|-------------|------------------|-----------|---------|
| 1.973      | vv   | 0.2933      | 38.9589          | 5.2212    | 0.4166  |
| 2.793      | vv   | 0.5399      | 165.6598         | 12.4023   | 1.7714  |
| 7.632      | vv   | 0.3333      | 186.1434         | 24.5665   | 1.9904  |
| 8.425      | vv   | 0.6665      | 8961.3502        | 1280.7858 | 95.8217 |
| <b>Sum</b> |      |             | <b>9352.1123</b> |           |         |

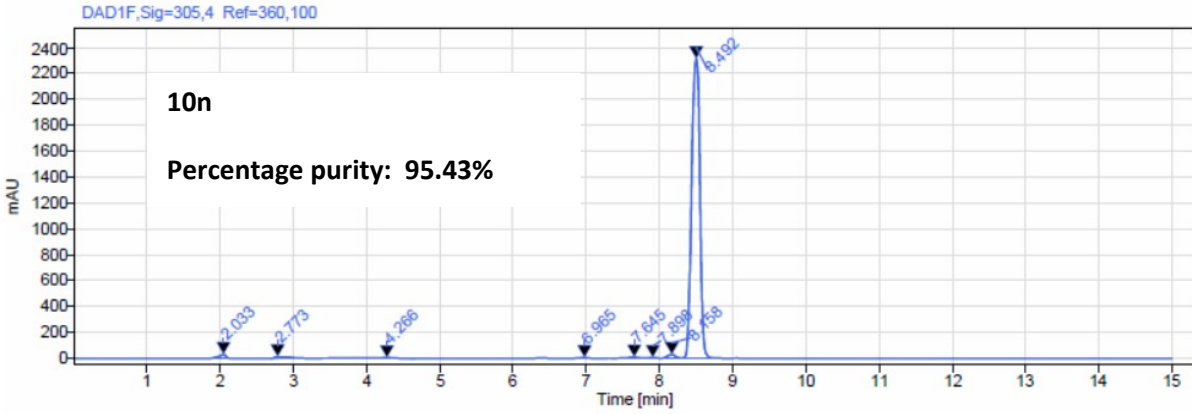

Signal: DAD1F,Sig=305,4 Ref=360,100

| RT [min]   | Type | Width [min] | Area              | Height    | Area%   |
|------------|------|-------------|-------------------|-----------|---------|
| 2.033      | vv   | 0.4133      | 204.4541          | 31.6993   | 1.0746  |
| 2.773      | vv   | 0.5666      | 167.6341          | 12.1769   | 0.8811  |
| 4.266      | vv   | 1.4064      | 152.4847          | 4.9668    | 0.8015  |
| 6.965      | vv   | 0.2266      | 31.3889           | 4.5454    | 0.1650  |
| 7.645      | vv   | 0.5932      | 71.8534           | 7.9484    | 0.3777  |
| 7.898      | vv   | 0.2133      | 32.0427           | 5.1651    | 0.1684  |
| 8.158      | vv   | 0.2999      | 208.6237          | 28.5700   | 1.0965  |
| 8.492      | vv   | 0.5732      | 18157.2442        | 2314.7493 | 95.4352 |
| <b>Sum</b> |      |             | <b>19025.7258</b> |           |         |

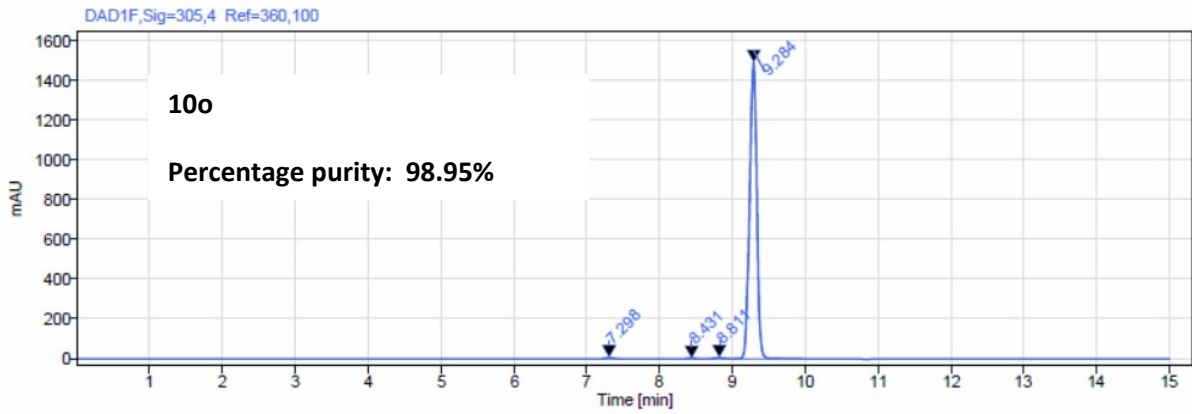

Signal: DAD1F,Sig=305,4 Ref=360,100

| RT [min]   | Type | Width [min] | Area              | Height    | Area%   |
|------------|------|-------------|-------------------|-----------|---------|
| 7.298      | vv   | 0.2533      | 41.5162           | 6.7534    | 0.4058  |
| 8.431      | vv   | 0.2199      | 16.0360           | 2.6829    | 0.1567  |
| 8.811      | vv   | 0.3266      | 49.5733           | 6.9646    | 0.4845  |
| 9.284      | vv   | 0.6998      | 10124.1761        | 1496.8453 | 98.9530 |
| <b>Sum</b> |      |             | <b>10231.3015</b> |           |         |

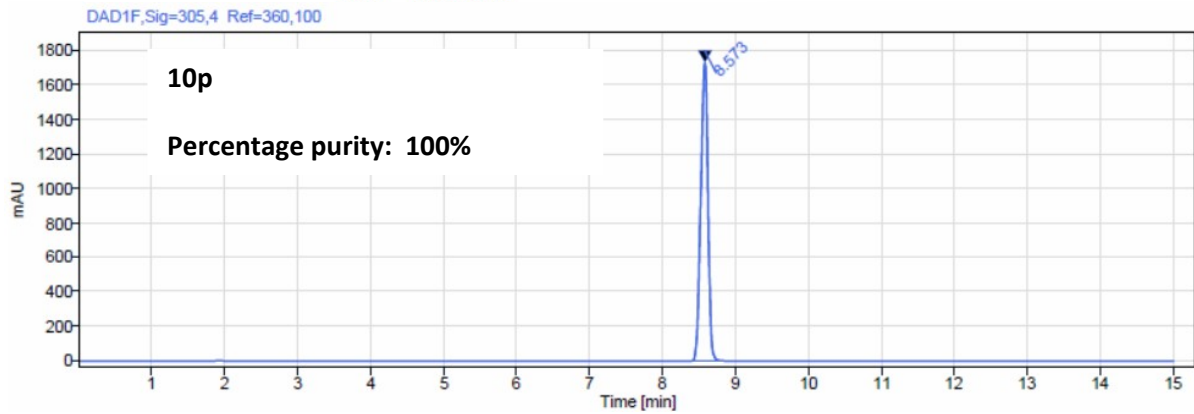

Signal: DAD1F,Sig=305,4 Ref=360,100

| RT [min]   | Type | Width [min] | Area              | Height    | Area%    |
|------------|------|-------------|-------------------|-----------|----------|
| 8.573      | vv   | 0.6933      | 11933.5500        | 1732.4507 | 100.0000 |
| <b>Sum</b> |      |             | <b>11933.5500</b> |           |          |

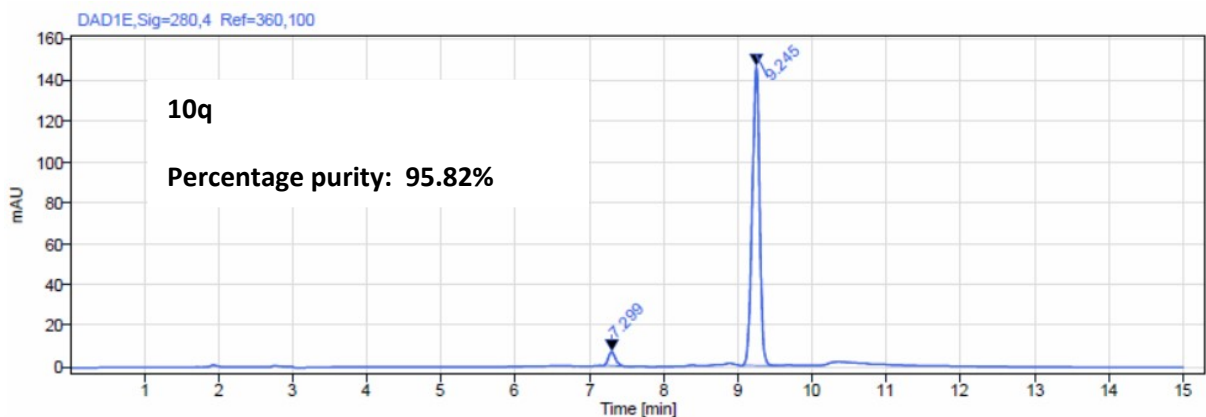

Signal: DAD1E,Sig=280,4 Ref=360,100

| RT [min]   | Type | Width [min] | Area             | Height   | Area%   |
|------------|------|-------------|------------------|----------|---------|
| 7.299      | vv   | 0.2933      | 43.9441          | 6.7087   | 4.1740  |
| 9.245      | vv   | 0.4599      | 1008.8523        | 146.0048 | 95.8260 |
| <b>Sum</b> |      |             | <b>1052.7964</b> |          |         |



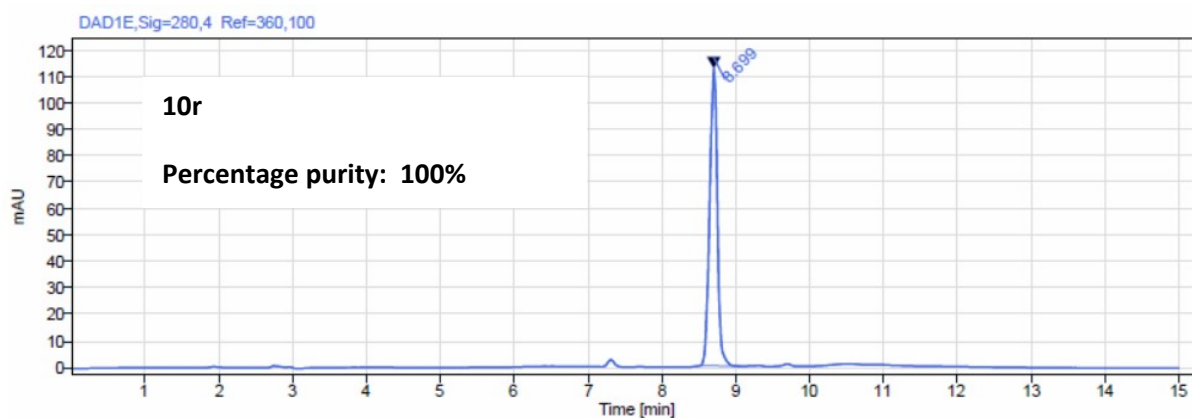

Signal: DAD1E,Sig=280,4 Ref=360,100

| RT [min]   | Type | Width [min] | Area            | Height   | Area%    |
|------------|------|-------------|-----------------|----------|----------|
| 8.699      | vv   | 0.5400      | 811.8415        | 112.2462 | 100.0000 |
| <b>Sum</b> |      |             | <b>811.8415</b> |          |          |

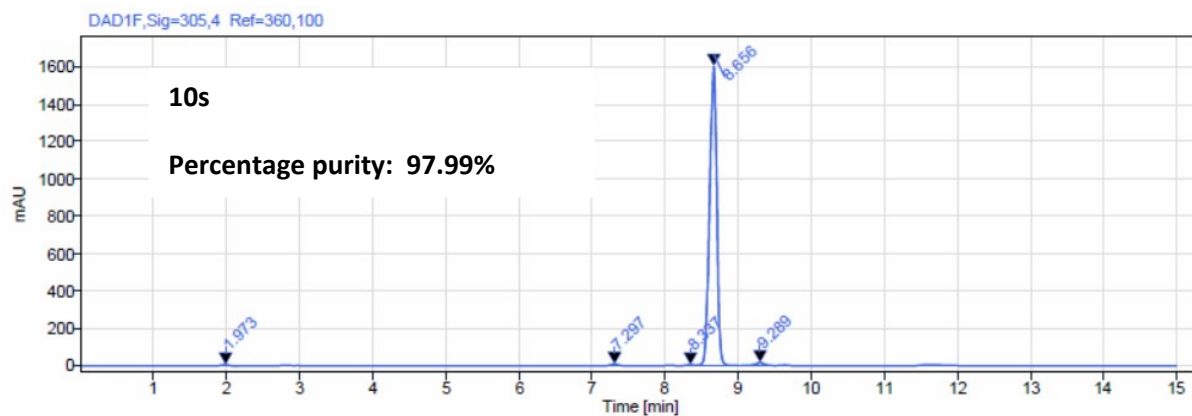

Signal: DAD1F,Sig=305,4 Ref=360,100

| RT [min]   | Type | Width [min] | Area              | Height    | Area%   |
|------------|------|-------------|-------------------|-----------|---------|
| 1.973      | vv   | 0.2865      | 31.1650           | 5.3831    | 0.2785  |
| 7.297      | vv   | 0.2599      | 43.5060           | 7.1168    | 0.3888  |
| 8.337      | vv   | 0.1799      | 20.3935           | 3.5613    | 0.1823  |
| 8.656      | vv   | 0.5798      | 10964.8409        | 1605.7181 | 97.9945 |
| 9.289      | vv   | 0.4865      | 129.3303          | 15.8515   | 1.1558  |
| <b>Sum</b> |      |             | <b>11189.2357</b> |           |         |

**FIGURE S39: HPLC chromatograms of all the synthesized compounds along with their percentage purity.**

#### 4. Lactate dehydrogenase-coupled enzyme assay results for compounds (9a-9s and 10a-10s)

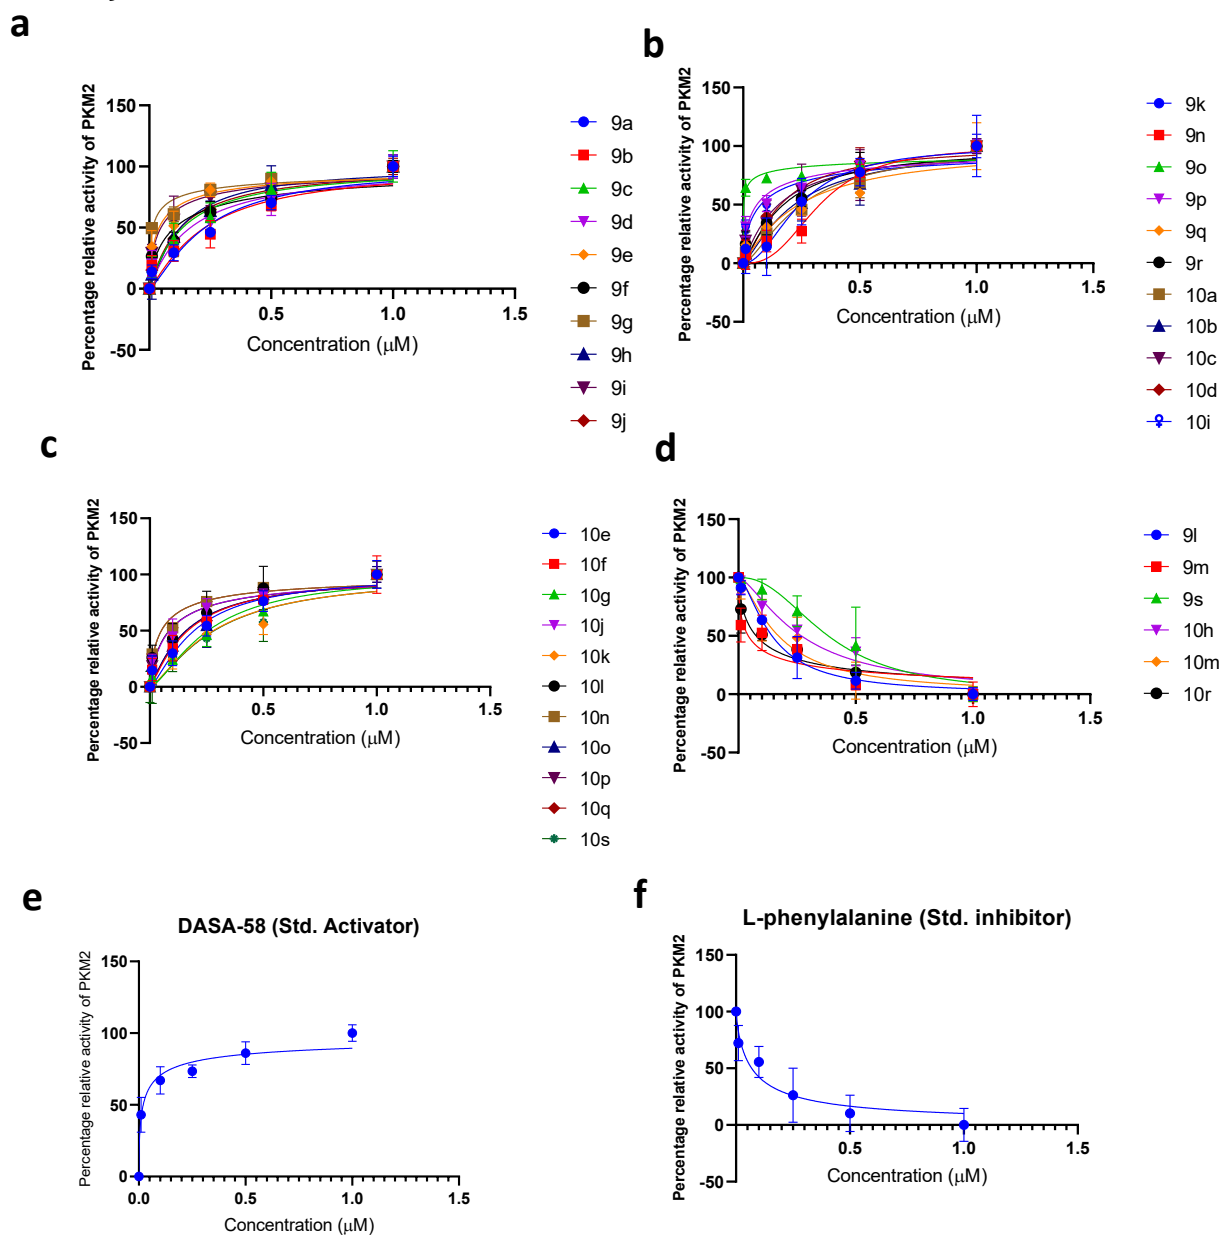

**FIGURE S40:** Lactate dehydrogenase-coupled enzyme assay results of the synthesized compounds. DASA-58 and L-phenylalanine has been used as the standard PKM2 activator and inhibitor.

### 5. Cytotoxicity (Alamar blue) assay results for compounds (9a-9s and 10a-10s)- A549 cell

line

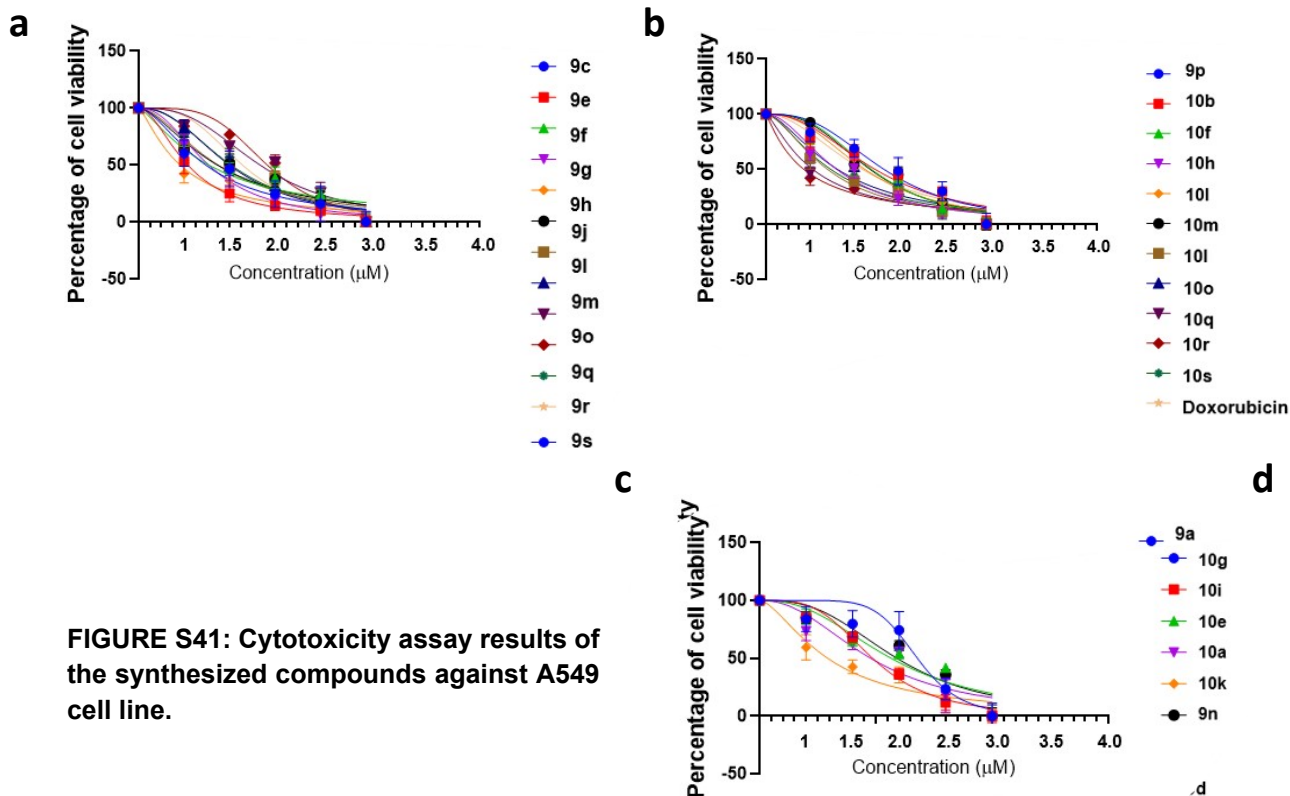

FIGURE S41: Cytotoxicity assay results of the synthesized compounds against A549 cell line.

### 6. Cytotoxicity (Alamar blue) assay results for compounds (9a-9s and 10a-10s)- BEAS-2B

a cell line

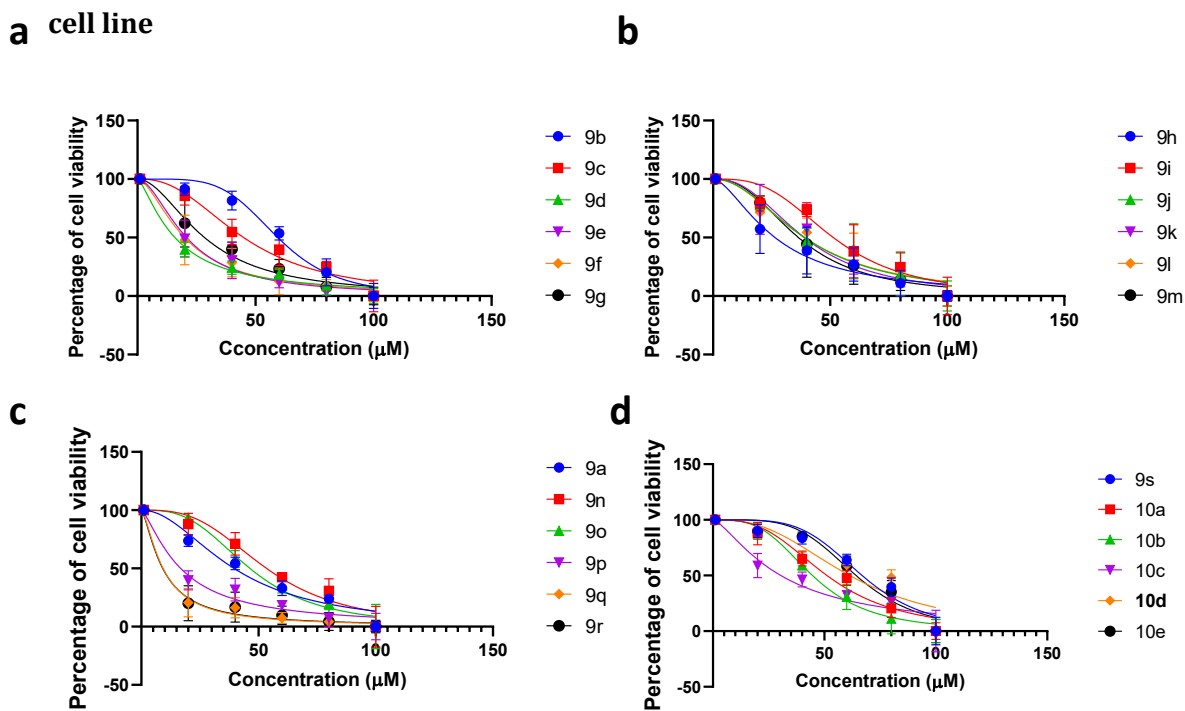

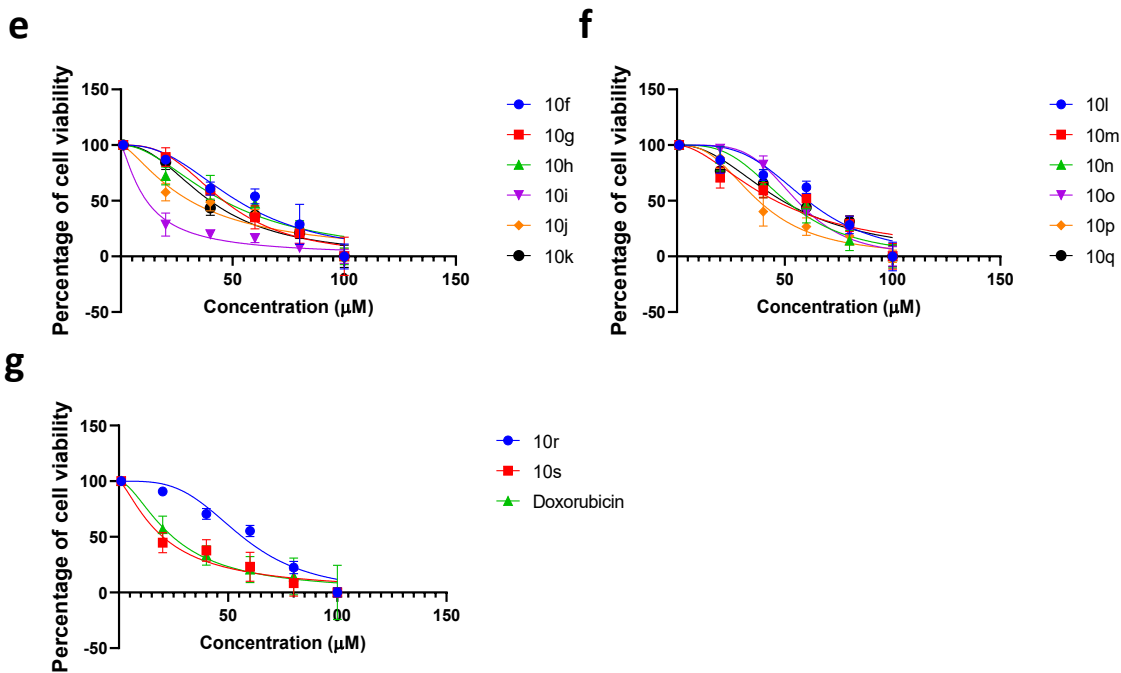

FIGURE S42: Cytotoxicity assay results of the synthesized compounds against BEAS-2B cell line.

7. Cytotoxicity (Alamar blue) assay results for compounds (9a-9s and 10a-10s)- COLO-205 cell line

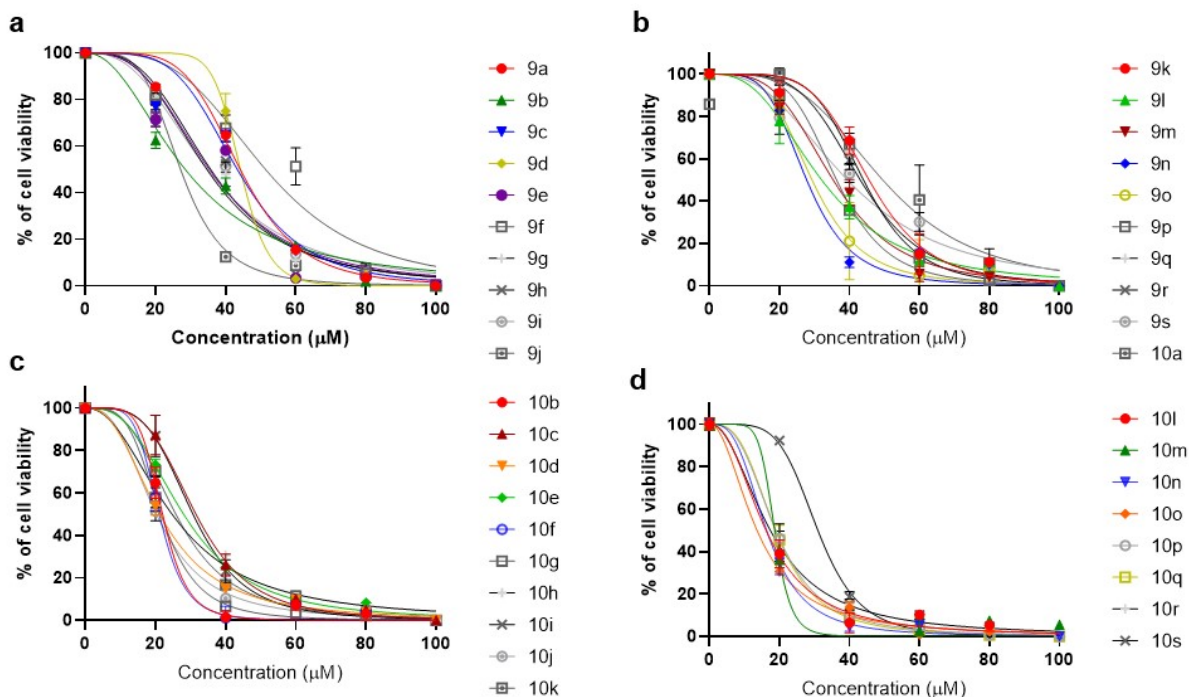

FIGURE S43: Cytotoxicity assay results of the synthesized compounds against COLO-205 cell line.

## 8. Cytotoxicity (Alamar blue) assay results for compounds (9a-9s and 10a-10s)- MCF-7 cell line

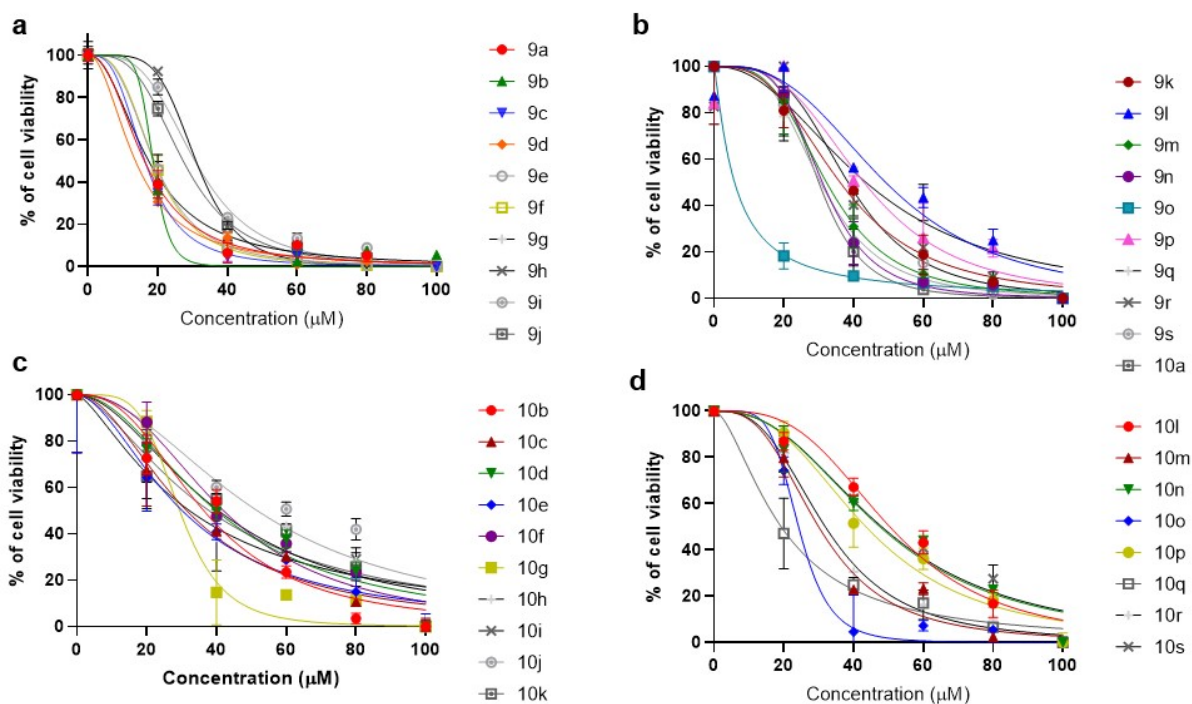

FIGURE S44: Cytotoxicity assay results of the synthesized compounds against MCF-7 cell line.

## 9. Cytotoxicity (Alamar blue) assay results for compounds (9a-9s and 10a-10s)- CAL-7 cell line

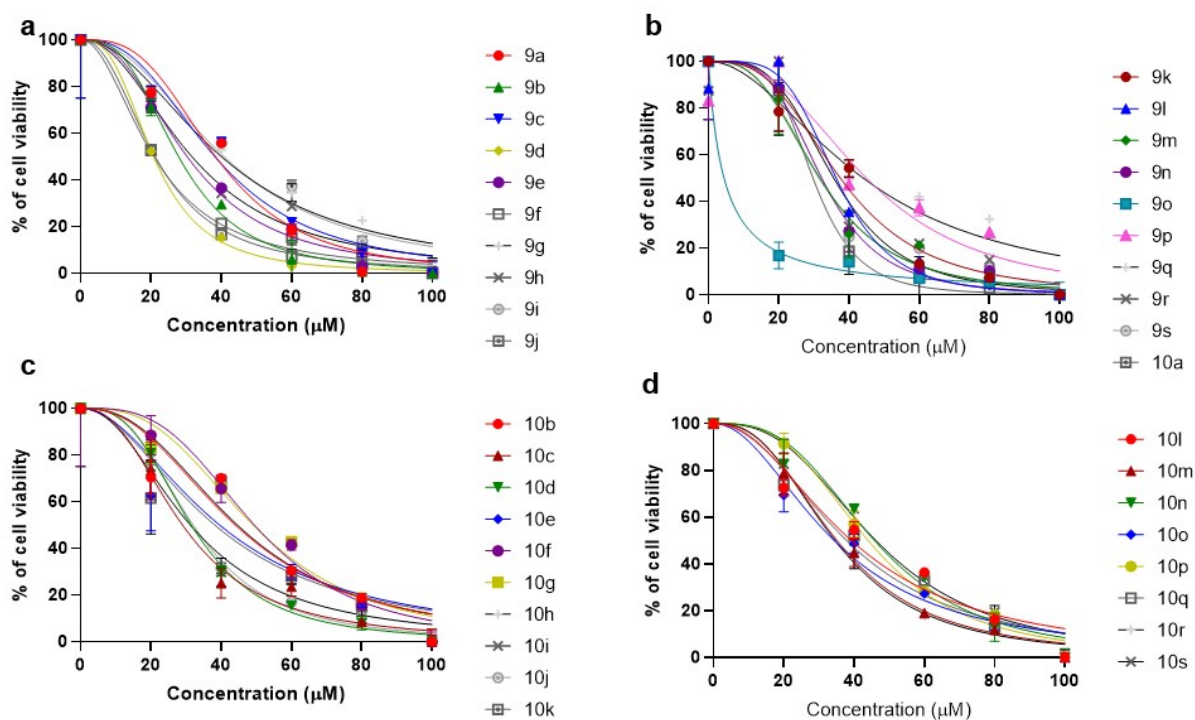

**FIGURE S45: Cytotoxicity assay results of the synthesized compounds against CAL-27 cell line.**

### 10. FE-SEM and EDAX data for compound 10q

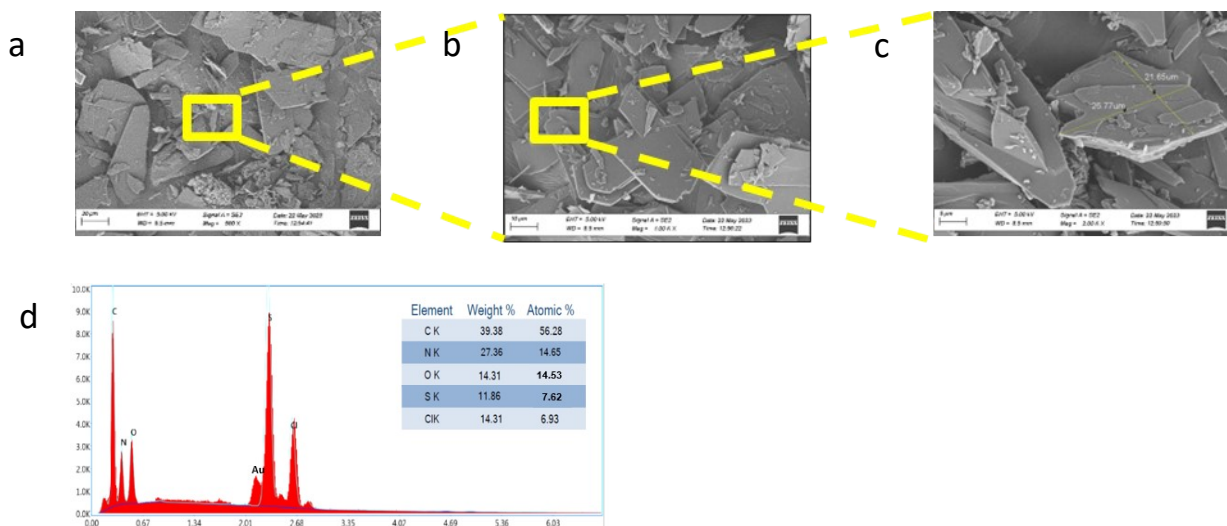

**FIGURE S46: Field Emission Scanning Electron Microscopy (FE-SEM) micrographs of compound 10q at different concentrations: a) 20 μM, b) 10 μM, and c) 5 μM. Additionally, d) Energy Dispersive X-Ray Analysis (EDX) reveals the elemental composition present in compound 10q.**

Field emission scanning electron microscopy (FE-SEM) provides topographical and elemental information with an almost limitless depth of field at magnifications ranging from 10x to 300,000x. With spatial resolution down to 1.5 nanometers, FE-SEM provides images that are three to six times clearer and less electrostatically distorted than those produced by traditional scanning electron microscopy (SEM). We developed a novel series of imidazopyri(mi)dine-based sulfonamides and were curious to observe the 3D structure and morphology. The compound 10q was preferred for FE-SEM and Energy-dispersive X-ray analysis (EDAX), as we could generate crystals of this very compound that was utilized for X-RD. Therefore, 10q was chosen for these studies to establish a correlation between each of the studies undertaken (Figure S43 a-c). This FE-SEM analysis helped determine whether the compound is amorphous or crystalline owing to its surface morphology. When FE-SEM images of 10q were analyzed, it was found that the representative synthesized compound particle had dimensions of 21.65 μm and 25.77 μm, respectively. As work went on, it became clear that the morphological analysis was focused on the manufactured molecule's uniform size and crystal-like surface shape. The surface morphology of the molecule was sheet-like.

EDAX confirmed the presence of elements with accurate percentages further simplifying and aiding in correct structural elucidation. It showed that 10q had Carbon (weight% of 39.38 and atomic% of 56.28), Nitrogen (weight% of 27.36 and atomic% of 14.65), Oxygen (weight% of 14.31 and atomic% of 7.62), Sulfur (weight% of 11.86 and atomic% of 14.53) and Chlorine (weight% of 7.10 and atomic% of 6.93) are at par with the chemical formula  $C_{17}H_{17}ClN_4O_3S_2$  of 10q (Figure S43 d).

## 11. Molecular dynamic simulation data for 9b-PKM2 interaction

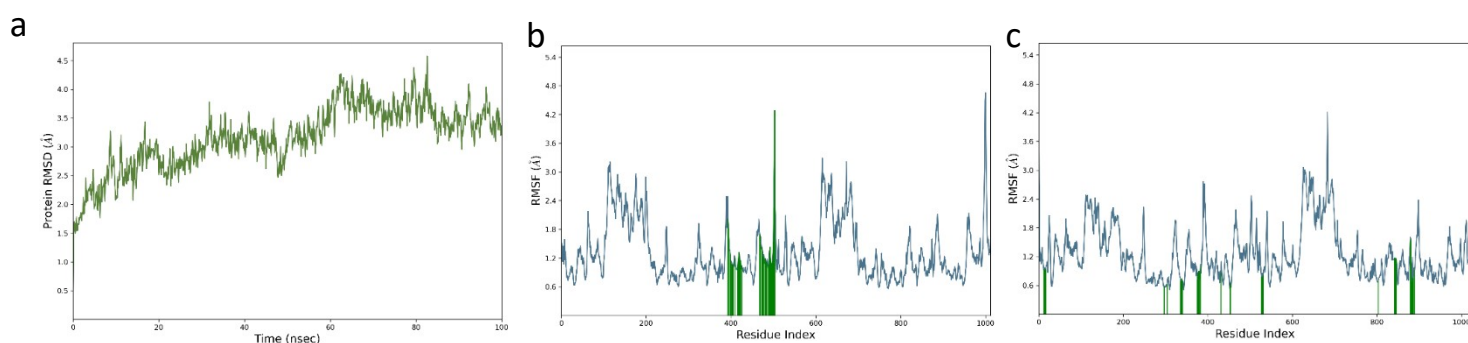

FIGURE S47: d) The RMSD graph of only PKM2 (apo), f) the RMSF graph of only PKM2, g) the RMSF graph of 9b at the activator binding site of PKM2 protein (PDB id 3GR4) after a molecular dynamics simulation of 100 ns.

## 12. Data related to single crystal X-ray diffraction analysis of compound 10q

Table S1. Crystal data and structure refinement for compound 10q.

|                                        |                                                                              |
|----------------------------------------|------------------------------------------------------------------------------|
| <b>Empirical formula</b>               | <b>C<sub>17</sub>H<sub>17</sub>ClN<sub>4</sub>O<sub>3</sub>S<sub>2</sub></b> |
| <b>Formula weight</b>                  | <b>424.91</b>                                                                |
| <b>Temperature/K</b>                   | <b>299.0</b>                                                                 |
| <b>Crystal system</b>                  | <b>triclinic</b>                                                             |
| <b>Space group</b>                     | <b>P-1</b>                                                                   |
| <b>a/Å</b>                             | <b>6.6727(9)</b>                                                             |
| <b>b/Å</b>                             | <b>10.1859(14)</b>                                                           |
| <b>c/Å</b>                             | <b>14.367(2)</b>                                                             |
| <b>α/°</b>                             | <b>85.903(5)</b>                                                             |
| <b>β/°</b>                             | <b>80.316(5)</b>                                                             |
| <b>γ/°</b>                             | <b>73.428(5)</b>                                                             |
| <b>Volume/Å<sup>3</sup></b>            | <b>922.3(2)</b>                                                              |
| <b>Z</b>                               | <b>2</b>                                                                     |
| <b>ρ<sub>calc</sub>/cm<sup>3</sup></b> | <b>1.530</b>                                                                 |
| <b>μ/mm<sup>-1</sup></b>               | <b>0.461</b>                                                                 |

|                                         |                                                                    |
|-----------------------------------------|--------------------------------------------------------------------|
| <b>F(000)</b>                           | <b>440.0</b>                                                       |
| <b>Crystal size/mm<sup>3</sup></b>      | <b>0.214 × 0.21 × 0.182</b>                                        |
| <b>Radiation</b>                        | <b>M<sub>o</sub>K<sub>α</sub> (λ = 0.71073)</b>                    |
| <b>2θ range for data collection/°</b>   | <b>2.876 to 58.58</b>                                              |
| <b>Index ranges</b>                     | <b>-8 ≤ h ≤ 8, -13 ≤ k ≤ 13, -19 ≤ l ≤ 18</b>                      |
| <b>Reflections collected</b>            | <b>25692</b>                                                       |
| <b>Independent reflections</b>          | <b>4319 [R<sub>int</sub> = 0.0615, R<sub>sigma</sub> = 0.0349]</b> |
| <b>Data/restraints/parameters</b>       | <b>4319/0/244</b>                                                  |
| <b>Goodness-of-fit on F<sup>2</sup></b> | <b>1.131</b>                                                       |
| <b>Final R indexes [I ≥ 2σ (I)]</b>     | <b>R1 = 0.0600, wR<sub>2</sub> = 0.1466</b>                        |
| <b>Final R indexes [all data]</b>       | <b>R1 = 0.0662, wR<sub>2</sub> = 0.1524</b>                        |
| <b>Largest diff. peak/hole / e Å</b>    | <b>0.63/-0.81</b>                                                  |



**Table S2. Fractional Atomic Coordinates ( $\times 10^4$ ) and Equivalent Isotropic Displacement Parameters ( $\text{\AA}^2 \times 10^3$ ) for compound 10q.  $U_{\text{eq}}$  is defined as 1/3 of the trace of the orthogonalised  $U_{ij}$  tensor.**

| Atom | $x$         | $y$         | $z$         | $U(\text{eq})$ |
|------|-------------|-------------|-------------|----------------|
| S2   | -531.8 (8)  | 5319.7 (4)  | 7349.4 (3)  | 40.41 (16)     |
| S1   | 2640.3 (10) | 4615.2 (7)  | 8698.0 (4)  | 55.22 (19)     |
| Cl1  | 4270.5 (13) | 3003.0 (10) | 10339.6 (5) | 92.5 (3)       |
| O3   | 7767 (2)    | 1057.0 (16) | 4665.4 (10) | 47.9 (4)       |
| O2   | -2696 (2)   | 5335.5 (18) | 7409.3 (12) | 56.5 (4)       |
| O1   | 56 (3)      | 6564.8 (15) | 7242.6 (12) | 58.5 (4)       |
| N3   | 9670 (2)    | 404.1 (14)  | 2730.2 (10) | 33.0 (3)       |
| N2   | 3461 (2)    | 2341.4 (15) | 5194.5 (10) | 33.6 (3)       |
| N1   | 786 (2)     | 4377.0 (15) | 6447.7 (11) | 35.8 (3)       |
| N4   | 8031 (3)    | 950 (2)     | 1451.2 (12) | 54.9 (5)       |
| C10  | 6671 (3)    | 1287.3 (18) | 4040.3 (12) | 33.6 (4)       |
| C6   | 1164 (3)    | 2551 (2)    | 5384.2 (14) | 38.9 (4)       |
| C12  | 6631 (3)    | 1356 (2)    | 2241.4 (14) | 45.8 (5)       |
| C11  | 7549 (3)    | 1045.4 (18) | 3054.6 (12) | 34.2 (4)       |
| C9   | 4275 (3)    | 1783 (2)    | 4256.1 (13) | 40.6 (4)       |
| C5   | 289 (3)     | 3074.3 (19) | 6371.4 (14) | 39.9 (4)       |
| C17  | 11356 (3)   | -121.3 (19) | 3206.0 (14) | 38.9 (4)       |
| C8   | 3073 (3)    | 4220 (2)    | 6244.6 (14) | 40.7 (4)       |
| C3   | -477 (4)    | 3564 (2)    | 8913.5 (16) | 54.7 (5)       |
| C13  | 9876 (3)    | 361 (2)     | 1755.2 (13) | 42.2 (4)       |
| C7   | 3919 (3)    | 3648 (2)    | 5263.7 (13) | 40.2 (4)       |
| C4   | 381 (3)     | 4460 (2)    | 8354.4 (13) | 41.6 (4)       |
| C16  | 13282 (3)   | -698 (2)    | 2702.3 (17) | 48.9 (5)       |
| C14  | 11882 (4)   | -240 (2)    | 1238.2 (16) | 54.1 (5)       |
| C2   | 704 (5)     | 2990 (3)    | 9646.7 (17) | 66.8 (7)       |
| C1   | 2402 (4)    | 3459 (3)    | 9607.2 (15) | 59.3 (7)       |
| C15  | 13557 (4)   | -752 (2)    | 1711.1 (18) | 56.6 (6)       |

**Table S3. Anisotropic Displacement Parameters ( $\text{\AA}^2 \times 10^3$ ) for compound 10q. The Anisotropic displacement factor exponent takes the form:  $-2\pi^2[h^2a^{*2}U_{11}+2hka^*b^*U_{12}+\dots]$ .**

| Atom | $U_{11}$ | $U_{22}$ | $U_{33}$ | $U_{23}$  | $U_{13}$  | $U_{12}$  |
|------|----------|----------|----------|-----------|-----------|-----------|
| S2   | 46.9(3)  | 33.6(2)  | 33.4(2)  | 1.50(17)  | -5.96(19) | -0.19(19) |
| S1   | 55.9(3)  | 69.1(4)  | 39.1(3)  | -2.6(2)   | -11.2(2)  | -12.4(3)  |
| C11  | 85.3(5)  | 123.6(7) | 42.0(3)  | -6.4(4)   | -25.9(3)  | 23.7(5)   |
| O3   | 42.5(7)  | 66.3(9)  | 32.4(7)  | -2.5(6)   | -13.4(6)  | -6.6(6)   |
| O2   | 41.7(8)  | 64.4(10) | 51.1(9)  | -5.0(7)   | -7.0(7)   | 5.5(7)    |
| O1   | 87.1(12) | 32.5(7)  | 50.6(9)  | 0.3(6)    | -9.5(8)   | -9.3(7)   |
| N3   | 36.4(7)  | 32.3(7)  | 30.2(7)  | 2.8(5)    | -5.6(6)   | -10.1(6)  |
| N2   | 34.4(7)  | 38.0(7)  | 29.7(7)  | -2.0(6)   | -3.7(6)   | -12.4(6)  |
| N1   | 40.1(8)  | 34.7(7)  | 31.0(7)  | 0.5(6)    | -0.6(6)   | -10.9(6)  |
| N4   | 52.3(10) | 76.6(13) | 29.0(8)  | 5.4(8)    | -7.5(7)   | -8.2(9)   |
| C10  | 36.5(8)  | 34.9(8)  | 29.8(8)  | 2.3(6)    | -8.5(7)   | -9.3(7)   |
| C6   | 36.1(9)  | 44.1(9)  | 39.1(9)  | -5.5(7)   | -4.6(7)   | -15.1(7)  |
| C12  | 40.5(10) | 61.3(12) | 31.2(9)  | 6.3(8)    | -9.4(7)   | -6.9(9)   |
| C11  | 34.2(8)  | 38.3(9)  | 29.7(8)  | 4.7(6)    | -6.8(7)   | -10.1(7)  |
| C9   | 35.3(9)  | 52.8(11) | 32.7(9)  | -6.4(8)   | -7.0(7)   | -8.5(8)   |
| C5   | 39.2(9)  | 40.3(9)  | 40.8(10) | -2.0(7)   | 1.9(7)    | -16.5(7)  |
| C17  | 37.9(9)  | 37.8(9)  | 42.9(10) | 0.6(7)    | -11.4(7)  | -11.1(7)  |
| C8   | 45.1(10) | 43.5(10) | 37.2(9)  | -5.1(7)   | 0.8(8)    | -21.2(8)  |
| C3   | 58.5(13) | 55.3(12) | 43.2(11) | 8.8(9)    | -0.5(9)   | -11.2(10) |
| C13  | 47.8(10) | 45.0(10) | 31.2(9)  | 1.1(7)    | -3.3(8)   | -10.7(8)  |
| C7   | 45.9(10) | 42.3(9)  | 34.4(9)  | -0.8(7)   | 2.9(7)    | -20.8(8)  |
| C4   | 46.2(10) | 40.7(9)  | 31.1(9)  | 0.1(7)    | -3.5(7)   | -2.9(8)   |
| C16  | 38.6(10) | 44.4(10) | 61.6(13) | -6.0(9)   | -11.5(9)  | -4.8(8)   |
| C14  | 54.8(12) | 57.6(12) | 42.1(11) | -6.8(9)   | 5.1(9)    | -9.0(10)  |
| C2   | 78.1(17) | 62.2(14) | 41.0(12) | 15.2(10)  | 1.0(11)   | 1.3(12)   |
| C1   | 59.3(13) | 68.2(14) | 30.1(9)  | -4.2(9)   | -6.1(9)   | 15.0(11)  |
| C15  | 44.6(11) | 53.4(12) | 63.6(14) | -14.0(10) | 4.3(10)   | -4.8(9)   |

**Table S4. List of bond lengths for compound 10q.**

| <b>Atom</b> | <b>Atom</b> | <b>Length/Å</b> | <b>Atom</b> | <b>Atom</b> | <b>Length/Å</b> |
|-------------|-------------|-----------------|-------------|-------------|-----------------|
| S2          | O2          | 1.4280 (17)     | N1          | C8          | 1.469 (2)       |
| S2          | O1          | 1.4218 (16)     | N4          | C12         | 1.350 (3)       |
| S2          | N1          | 1.6390 (16)     | N4          | C13         | 1.338 (3)       |
| S2          | C4          | 1.7417 (19)     | C10         | C11         | 1.448 (2)       |
| S1          | C4          | 1.714 (2)       | C10         | C9          | 1.517 (2)       |
| S1          | C1          | 1.713 (3)       | C6          | C5          | 1.513 (3)       |
| Cl1         | C1          | 1.708 (2)       | C12         | C11         | 1.385 (2)       |
| O3          | C10         | 1.221 (2)       | C17         | C16         | 1.356 (3)       |
| N3          | C11         | 1.393 (2)       | C8          | C7          | 1.519 (3)       |
| N3          | C17         | 1.372 (2)       | C3          | C4          | 1.358 (3)       |
| N3          | C13         | 1.387 (2)       | C3          | C2          | 1.414 (3)       |
| N2          | C6          | 1.466 (2)       | C13         | C14         | 1.407 (3)       |
| N2          | C9          | 1.457 (2)       | C16         | C15         | 1.408 (3)       |
| N2          | C7          | 1.461 (2)       | C14         | C15         | 1.362 (3)       |
| N1          | C5          | 1.472 (2)       | C2          | C1          | 1.341 (4)       |

**Table S5. List of bond angles for compound 10q.**

| Atom | Atom | Atom | Angle/°     | Atom | Atom | Atom | Angle/°     |
|------|------|------|-------------|------|------|------|-------------|
| O2   | S2   | N1   | 106.82 (9)  | N3   | C11  | C10  | 124.15 (15) |
| O2   | S2   | C4   | 107.60 (10) | C12  | C11  | N3   | 104.22 (16) |
| O1   | S2   | O2   | 120.46 (11) | C12  | C11  | C10  | 131.63 (17) |
| O1   | S2   | N1   | 106.93 (9)  | N2   | C9   | C10  | 114.20 (15) |
| O1   | S2   | C4   | 107.66 (10) | N1   | C5   | C6   | 108.45 (15) |
| N1   | S2   | C4   | 106.64 (8)  | C16  | C17  | N3   | 118.61 (19) |
| C1   | S1   | C4   | 89.94 (12)  | N1   | C8   | C7   | 108.99 (16) |
| C17  | N3   | C11  | 131.15 (16) | C4   | C3   | C2   | 112.1 (2)   |
| C17  | N3   | C13  | 122.15 (16) | N3   | C13  | C14  | 118.84 (19) |
| C13  | N3   | C11  | 106.70 (15) | N4   | C13  | N3   | 111.39 (17) |
| C9   | N2   | C6   | 109.10 (14) | N4   | C13  | C14  | 129.8 (2)   |
| C9   | N2   | C7   | 110.93 (15) | N2   | C7   | C8   | 110.58 (15) |
| C7   | N2   | C6   | 109.19 (14) | S1   | C4   | S2   | 121.17 (12) |
| C5   | N1   | S2   | 116.30 (12) | C3   | C4   | S2   | 126.09 (18) |
| C8   | N1   | S2   | 116.52 (13) | C3   | C4   | S1   | 112.64 (17) |
| C8   | N1   | C5   | 111.92 (14) | C17  | C16  | C15  | 120.9 (2)   |
| C13  | N4   | C12  | 104.98 (17) | C15  | C14  | C13  | 118.9 (2)   |
| O3   | C10  | C11  | 122.65 (17) | C1   | C2   | C3   | 111.8 (2)   |
| O3   | C10  | C9   | 121.71 (16) | Cl1  | C1   | S1   | 119.46 (19) |
| C11  | C10  | C9   | 115.58 (15) | C2   | C1   | S1   | 113.57 (18) |
| N2   | C6   | C5   | 110.24 (15) | C2   | C1   | Cl1  | 127.0 (2)   |
| N4   | C12  | C11  | 112.71 (18) | C14  | C15  | C16  | 120.6 (2)   |

**Table S6. Hydrogen Atom Coordinates ( $\text{\AA}\times 10^4$ ) and Isotropic Displacement Parameters ( $\text{\AA}^2\times 10^3$ ) for compound 10q.**

| Atom | x        | y        | z       | U(eq) |
|------|----------|----------|---------|-------|
| H6A  | 847.24   | 1693.07  | 5320.2  | 47    |
| H6B  | 498.76   | 3207.62  | 4927.46 | 47    |
| H12  | 5203.71  | 1796.45  | 2239.89 | 55    |
| H9A  | 3769.48  | 2482.58  | 3789.89 | 49    |
| H9B  | 3704.51  | 1023.52  | 4193.14 | 49    |
| H5A  | -1231.54 | 3215.18  | 6493.44 | 48    |
| H5B  | 918.35   | 2409.98  | 6832.55 | 48    |
| H17  | 11180.84 | -82.37   | 3860.43 | 47    |
| H8A  | 3780.29  | 3602.29  | 6709.43 | 49    |
| H8B  | 3343.84  | 5100.49  | 6276.3  | 49    |
| H3   | -1697.78 | 3352.56  | 8824.72 | 66    |
| H7A  | 3273.09  | 4296.21  | 4798.12 | 48    |
| H7B  | 5436.52  | 3517.01  | 5130.51 | 48    |
| H16  | 14437.17 | -1063.45 | 3015.84 | 59    |
| H14  | 12060.94 | -286.62  | 584.17  | 65    |
| H2   | 346      | 2363.83  | 10101   | 80    |
| H15  | 14893.18 | -1141.31 | 1376.47 | 68    |

**Table S7. A compendium of the results obtained through docking, lactate dehydrogenase coupled enzyme assay and in vitro screening of A549 human adenocarcinoma cell line where PKM2 is overexpressed. All the compounds were evaluated against normal lung epithelial cell line BEAS-2B to establish their cancer specificity.\***

| S. No. | Compound Code | Isolated yield in % | IC <sub>50</sub> (μM)-A549 | IC <sub>50</sub> (μM)-BEAS-2B | Z | Y                     | AC <sub>50</sub> (PKM2) in μM <sup>#</sup> | IC <sub>50</sub> (PKM2) in μM <sup>#</sup> | Docking score -activator binding site (Kcal/mol) |
|--------|---------------|---------------------|----------------------------|-------------------------------|---|-----------------------|--------------------------------------------|--------------------------------------------|--------------------------------------------------|
| 1      | 9a            | 63                  | 1.00±0.365                 | 39.55±5.35                    | N | Ph-Me                 | 0.1049±0.058                               |                                            | -8.59                                            |
| 2      | 9b            | 68                  | 0.91±0.314                 | 59.46±4.53                    | N | Ph                    | 0.03007±0.083                              |                                            | -8.09                                            |
| 3      | 9c            | 72                  | 1.47±0.141                 | 44.99±6.76                    | N | Thiophene             | 0.0935±0.060                               |                                            | -7.80                                            |
| 4      | 9d            | 78                  | 1.23±1.217                 | 15.87±3.77                    | N | 4-CF <sub>3</sub> -Ph | 0.2109±0.071                               |                                            | -8.16                                            |
| 5      | 9e            | 71                  | 1.33±0.069                 | 20.81±4.57                    | N | 4-Br-Ph               | 0.5305±0.019                               |                                            | -8.24                                            |
| 6      | 9f            | 80                  | 1.48±0.140                 | 19.97±5.42                    | N | 4-F-Ph                | 0.7034±0.047                               |                                            | -8.83                                            |
| 7      | 9g            | 66                  | 1.48±0.054                 | 28.43±5.86                    | N | 4-OMe-Ph              | 0.5354±0.0081                              |                                            | -8.48                                            |
| 8      | 9h            | 74                  | 1.26±0.16                  | 26.46±8.21                    | N | 2,5-dichloro-Ph       | 0.6478±0.049                               |                                            | -8.20                                            |
| 9      | 9i            | 81                  | 1.06±0.267                 | 51.35±8.55                    | N | 2,4,6-trimethyl-Ph    | 0.7253±0.021                               |                                            | -9.33                                            |

|    |            |           |                   |                   |           |                       |                     |              |
|----|------------|-----------|-------------------|-------------------|-----------|-----------------------|---------------------|--------------|
| 10 | 9j         | 69        | 1.54±0.111        | 39.07±8.62        | N         | 5-Br,2-Ome-Ph         | 0.6428±0.041        | -7.18        |
| 11 | 9k         | 62        | 1.14±0.498        | 38.98±8.17        | N         | 3-Br-Ph               | 0.6340±0.076        | -8.75        |
| 12 | 9l         | 63        | 1.54±0.087        | 39.04±8.73        | N         | Cyclohexyl            | 0.7829±0.031        | -7.54        |
| 13 | 9m         | 60        | 1.60±0.048        | 36.47±7.00        | N         | 5-Br-thiophene        | 0.6806±0.030        | -7.87        |
| 14 | 9n         | 70        | 1.76±0.069        | 53.45±6.84        | N         | Cyclopropyl           | 0.0923±0.059        | -7.07        |
| 15 | 9o         | 61        | 1.72±0.059        | 46.32±5.04        | N         | 2-cyano-Ph            | 0.5153±0.002        | -8.53        |
| 16 | 9p         | 75        | 1.72±0.070        | 16.78±5.3         | N         | 2-Cl,4-F-Ph           | 0.6121±0.415        | -8.87        |
| 17 | 9q         | 77        | 1.75±0.043        | 9.29±3.76         | N         | 5-Cl-thiophene        | 0.4372±0.089        | -7.81        |
| 18 | 9r         | 79        | 1.60±0.061        | 9.13±4.81         | N         | 4'-OMe-Biphenyl       | 0.4347±0.566        | -8.26        |
| 19 | 9s         | 66        | 1.66±0.048        | 66.92±6.01        | N         | 4-NO <sub>2</sub> -Ph | 0.0388±0.089        | NA           |
| 20 | 10a        | 75        | 1.67±0.113        | 51.15±5.82        | CH        | Ph-Me                 | 0.7955±0.055        | -7.24        |
| 21 | 10b        | 74        | 1.69±0.074        | 44.68±4.49        | CH        | Ph                    | 0.1410±0.630        | -7.18        |
| 22 | <b>10c</b> | <b>69</b> | <b>1.14±0.277</b> | <b>30.47±8.41</b> | <b>CH</b> | <b>Thiophene</b>      | <b>0.1340±0.079</b> | <b>-8.75</b> |
| 23 | 10d        | 69        | 1.30±0.145        | 61.36±9.97        | CH        | 4-CF <sub>3</sub> -Ph | 0.550±0.044         | -7.54        |
| 24 | 10e        | 64        | 1.74±0.074        | 64.24±5.33        | CH        | 4-Br-Ph               | 0.1462±0.060        | -7.87        |
| 25 | 10f        | 69        | 1.68±0.065        | 52.22±8.50        | CH        | 4-F-Ph                | 0.382±0.056         | -7.07        |
| 26 | 10g        | 79        | 1.83±0.053        | 46.05±5.58        | CH        | 4-OMe-Ph              | 0.0416±0.048        | -8.53        |
| 27 | 10h        | 72        | 1.50±0.084        | 45.95±9.06        | CH        | 2,5-dichloro-Ph       | 0.6158±0.065        | -7.81        |
| 28 | 10i        | 80        | 1.68±0.039        | 11.47±3.59        | CH        | 2,4,6-trimethyl-Ph    | 0.1806±0.021        | -9.10        |
| 29 | 10j        | 70        | 1.44±0.084        | 30.92±8.10        | CH        | 5-Br,2-OMe-Ph         | 0.3285±0.035        | -6.50        |
| 30 | 10k        | 77        | 1.67±0.120        | 39.90±5.16        | CH        | 3-Br-Ph               | 0.6060±0.064        | -8.73        |
| 31 | 10l        | 78        | 1.65±0.068        | 60.57±7.60        | CH        | Cyclohexyl            | 0.889±0.049         | -5.14        |
| 32 | 10m        | 62        | 1.67±0.049        | 45.69±10.74       | CH        | 5-Br-thiophene        | 0.1382±0.063        | -8.17        |
| 33 | 10n        | 78        | 1.24±0.171        | 50.54±7.04        | CH        | Cyclopropyl           | 0.432±0.017         | -7.40        |
| 34 | 10o        | 66        | 1.51±0.105        | 55.67±2.88        | CH        | 2-cyano-Ph            | 0.1465±0.071        | -8.64        |
| 35 | <b>10p</b> | <b>62</b> | <b>0.95±0.366</b> | <b>37.80±4.73</b> | <b>CH</b> | <b>2-Cl,4-F-Ph</b>    | <b>0.2046±0.071</b> | <b>-9.35</b> |
| 36 | 10q        | 77        | 1.32±0.170        | 48.90±7.90        | CH        | 5-Cl-thiophene        | 0.5517±0.017        | -6.12        |
| 37 | 10r        | 73        | 1.23±0.216        | 56.52±5.19        | CH        | 4'-OMe-Biphenyl       | 0.341±0.036         | -8.13        |

|    |                                             |    |            |            |    |                       |              |        |
|----|---------------------------------------------|----|------------|------------|----|-----------------------|--------------|--------|
| 38 | 10s                                         | 65 | 1.46±0.118 | 20.09±6.58 | CH | 4-NO <sub>2</sub> -Ph | 0.6492±0.089 | NA     |
| 39 | Doxorubicin                                 |    | 1.64±0.101 | 24.67±7.36 |    |                       |              |        |
| 40 | DASA-58<br>(Std. PKM2<br>activator)         |    | 1.46±0.27  | 35.23±3.36 |    |                       | 0.020±0.010  | -8.279 |
| 41 | L-phenylalanine<br>(Std. PKM2<br>inhibitor) |    |            |            |    |                       | 0.055±0.042  |        |

\*This combined data set was analyzed for compound selection from the entire series, in case of further studies. The results of the LDH coupled enzyme assay and the cytotoxicity assay are expressed as mean ± SEM done in triplicate.

### 13. Chemical Structures of the synthesized compounds

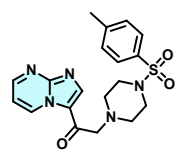

AC<sub>50</sub> (PKM2) : 104.9 ± 0.058 nM  
 IC<sub>50</sub> (A549) : 1000.0 ± 0.365 nM  
 IC<sub>50</sub> (BEAS-2B) : 39550.0 ± 5.35 nM

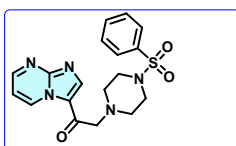

AC<sub>50</sub> (PKM2) : 30.07 ± 0.083 nM  
 IC<sub>50</sub> (A549) : 910.0 ± 0.314 nM  
 IC<sub>50</sub> (BEAS-2B) : 59460.0 ± 4.53 nM

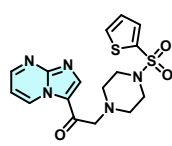

AC<sub>50</sub> (PKM2) : 93.5 ± 0.060 nM  
 IC<sub>50</sub> (A549) : 1470.0 ± 0.141 nM  
 IC<sub>50</sub> (BEAS-2B) : 44990.0 ± 6.76 nM

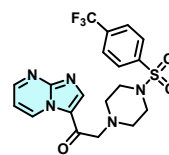

AC<sub>50</sub> (PKM2) : 210.9 ± 0.071 nM  
 IC<sub>50</sub> (A549) : 1230.0 ± 1.217 nM  
 IC<sub>50</sub> (BEAS-2B) : 15870.0 ± 3.77 nM

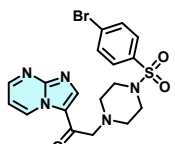

AC<sub>50</sub> (PKM2) : 530.5 ± 0.019 nM  
 IC<sub>50</sub> (A549) : 1330.0 ± 0.069 nM  
 IC<sub>50</sub> (BEAS-2B) : 20810.0 ± 4.57 nM

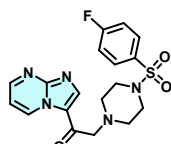

AC<sub>50</sub> (PKM2) : 703.4 ± 0.047 nM  
 IC<sub>50</sub> (A549) : 1480.0 ± 0.140 nM  
 IC<sub>50</sub> (BEAS-2B) : 19970.0 ± 5.42 nM

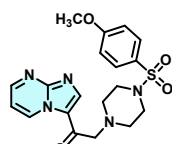

AC<sub>50</sub> (PKM2) : 535.4 ± 0.0081 nM  
 IC<sub>50</sub> (A549) : 1480.0 ± 0.054 nM  
 IC<sub>50</sub> (BEAS-2B) : 28430.0 ± 5.86 nM

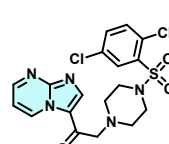

AC<sub>50</sub> (PKM2) : 647.8 ± 0.049 nM  
 IC<sub>50</sub> (A549) : 1260.0 ± 0.16 nM  
 IC<sub>50</sub> (BEAS-2B) : 26460.0 ± 8.21 nM

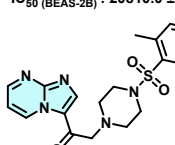

AC<sub>50</sub> (PKM2) : 725.3 ± 0.021 nM  
 IC<sub>50</sub> (A549) : 1060.0 ± 0.267 nM  
 IC<sub>50</sub> (BEAS-2B) : 51350.0 ± 8.55 nM

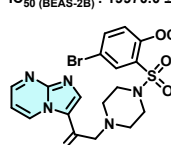

AC<sub>50</sub> (PKM2) : 642.8 ± 0.041 nM  
 IC<sub>50</sub> (A549) : 1540.0 ± 0.111 nM  
 IC<sub>50</sub> (BEAS-2B) : 39070.0 ± 8.62 nM

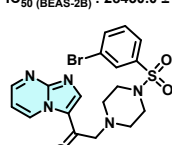

AC<sub>50</sub> (PKM2) : 634.0 ± 0.076 nM  
 IC<sub>50</sub> (A549) : 1140.0 ± 0.498 nM  
 IC<sub>50</sub> (BEAS-2B) : 38980.0 ± 8.17 nM

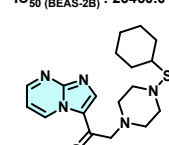

AC<sub>50</sub> (PKM2) : 782.9 ± 0.031 nM  
 IC<sub>50</sub> (A549) : 1540.0 ± 0.087 nM  
 IC<sub>50</sub> (BEAS-2B) : 39040.0 ± 8.73 nM

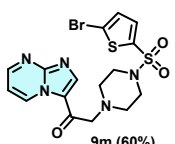

IC<sub>50</sub> (PKM2) : 680.6 ± 0.030 nM  
 IC<sub>50</sub> (A549) : 1600.0 ± 0.048 nM  
 IC<sub>50</sub> (BEAS-2B) : 36470.0 ± 7.00 nM

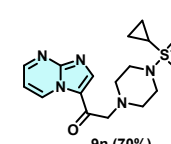

AC<sub>50</sub> (PKM2) : 923.0 ± 0.059 nM  
 IC<sub>50</sub> (A549) : 1760.0 ± 0.069 nM  
 IC<sub>50</sub> (BEAS-2B) : 53450.0 ± 6.84 nM

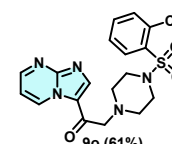

AC<sub>50</sub> (PKM2) : 515.3 ± 0.002 nM  
 IC<sub>50</sub> (A549) : 1720.0 ± 0.059 nM  
 IC<sub>50</sub> (BEAS-2B) : 46320.0 ± 5.04 nM

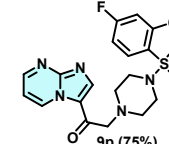

AC<sub>50</sub> (PKM2) : 612.1 ± 0.415 nM  
 IC<sub>50</sub> (A549) : 1720.0 ± 0.070 nM  
 IC<sub>50</sub> (BEAS-2B) : 16780.0 ± 5.3 nM

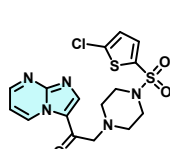

AC<sub>50</sub> (PKM2) : 437.2 ± 0.089 nM  
 IC<sub>50</sub> (A549) : 1750.0 ± 0.043 nM  
 IC<sub>50</sub> (BEAS-2B) : 9290.0 ± 3.76 nM

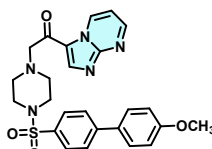

AC<sub>50</sub> (PKM2) : 434.7 ± 0.566 nM  
 IC<sub>50</sub> (A549) : 1600.0 ± 0.061 nM  
 IC<sub>50</sub> (BEAS-2B) : 9130.0 ± 4.81 nM

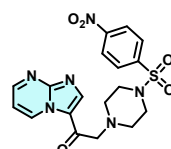

IC<sub>50</sub> (PKM2) : 38.8 ± 0.089 nM  
 IC<sub>50</sub> (A549) : 1660.0 ± 0.048 nM  
 IC<sub>50</sub> (BEAS-2B) : 66920.0 ± 6.01 nM



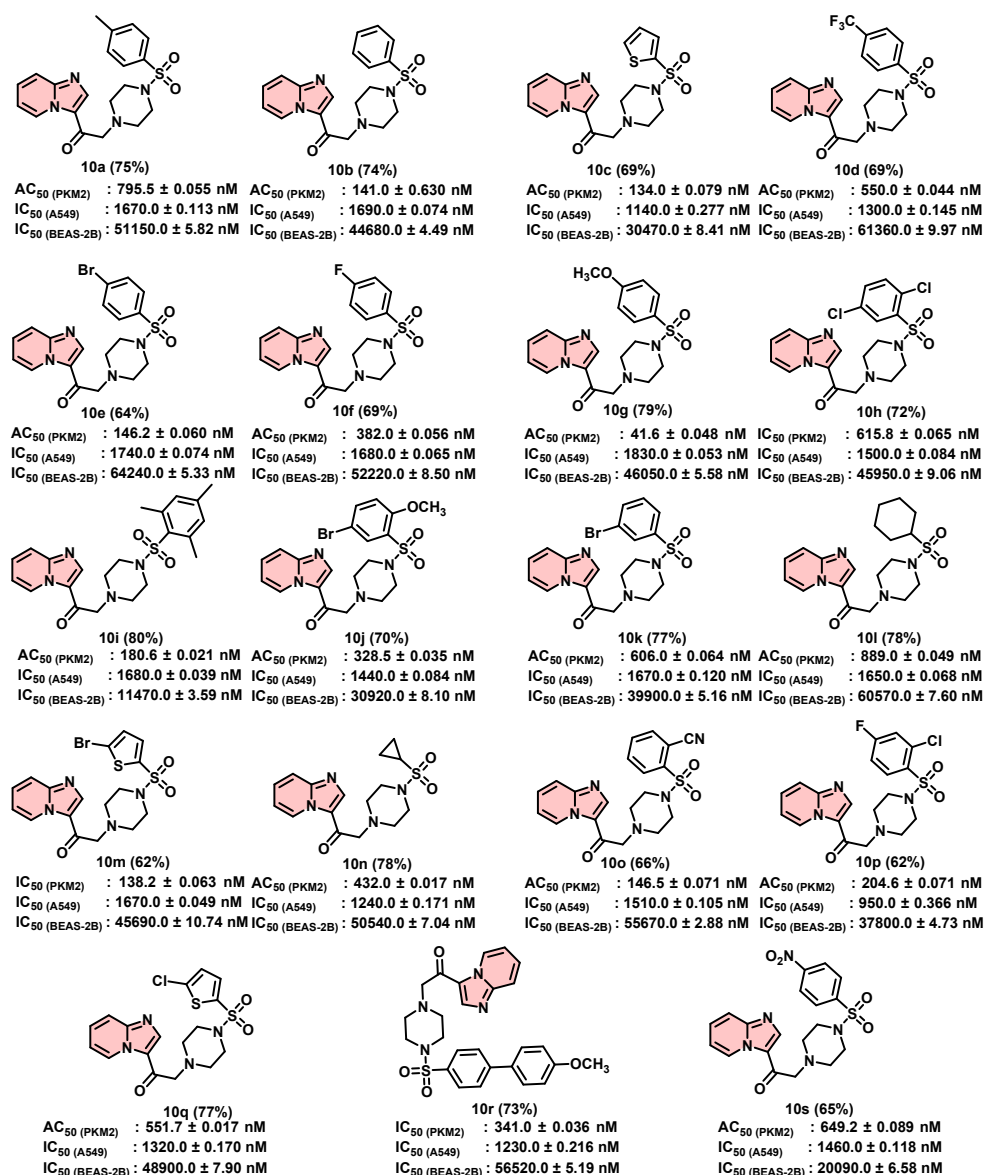

**Figure S48.** Chemical structures of imidazopyrimidine-flanked sulfonamide derivatives (**9a-9s**) and imidazopyridine-flanked sulfonamide derivatives (**10a-10s**) along with their respective isolated yields. The  $AC_{50}(\text{PKM2})$  represents the concentration at which 50% of the maximum activity of PKM2 is observed, while the  $IC_{50}(\text{PKM2})$  indicates the concentration at which 50% of the maximum inhibition of PKM2 is achieved. The results from the lactate dehydrogenase-coupled enzyme assay and the cytotoxicity assay are expressed as the mean  $\pm$  SEM of triplicate measurements. Compound **9b** is the most promising candidate in the series due to its high potency and was consequently selected for further biological evaluation.
